# Supplementary material for: Using singular value decomposition to analyze drug/β-cyclodextrin mixtures: insights from X-ray powder diffraction patterns
Source: Royal Society of Chemistry journal article supplement (doi:10.1039/d3cp02737f), 2023-01-01
Supplement: d3cp02737f1.pdf [file d3cp02737f1.pdf]

# Using Singular Value Decomposition to Analyze Drug/beta-Cyclodextrin Mixtures: Insight from X-ray Powder Diffraction Patterns

Kanji Hasegawa; Satoru Goto\*; Chihiro Tsunoda ; Chihiro Kuroda; Yuta Okumura; Ryosuke Hiroshige; Ayako Wada-Hirai; Shota Shimizu; Hideshi Yokoyama; and Tomohiro Tsuchida

Faculty of Pharmaceutical Sciences, Tokyo University of Science

## Supplemental Materials

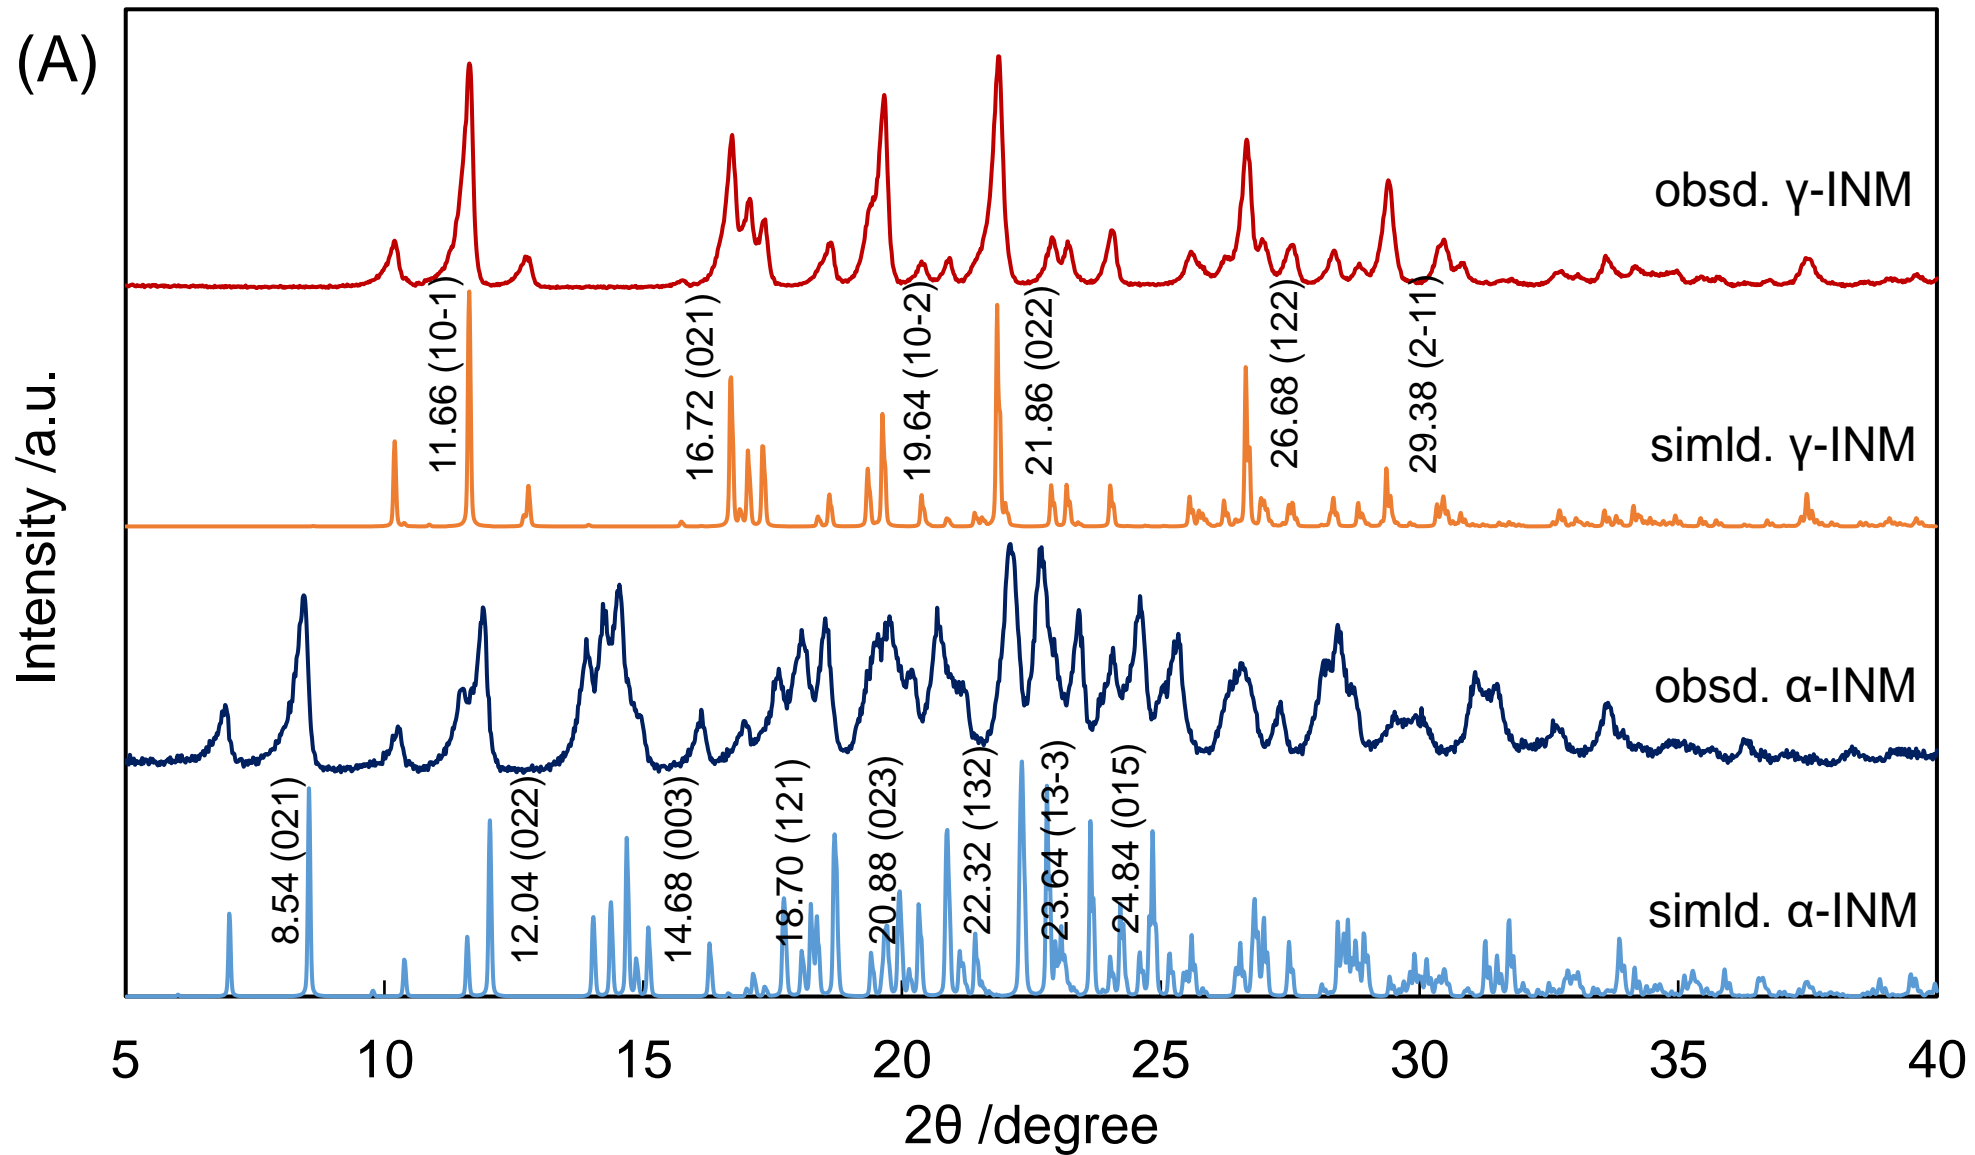

Figure S2(A) The simulated diffractograms of  $\gamma$ - (orange) and  $\alpha$ -INM (blue). The corresponding CCDC entries are INDMET (T.J. Kistemacher & R.E. Marsh, 1972) and INDMET04 (M. Arisawa, et al 2011). Numbers were presented 2 $\theta$  angles and Miller indexes  $h$ ,  $k$ , and  $l$  were in parenthesis.

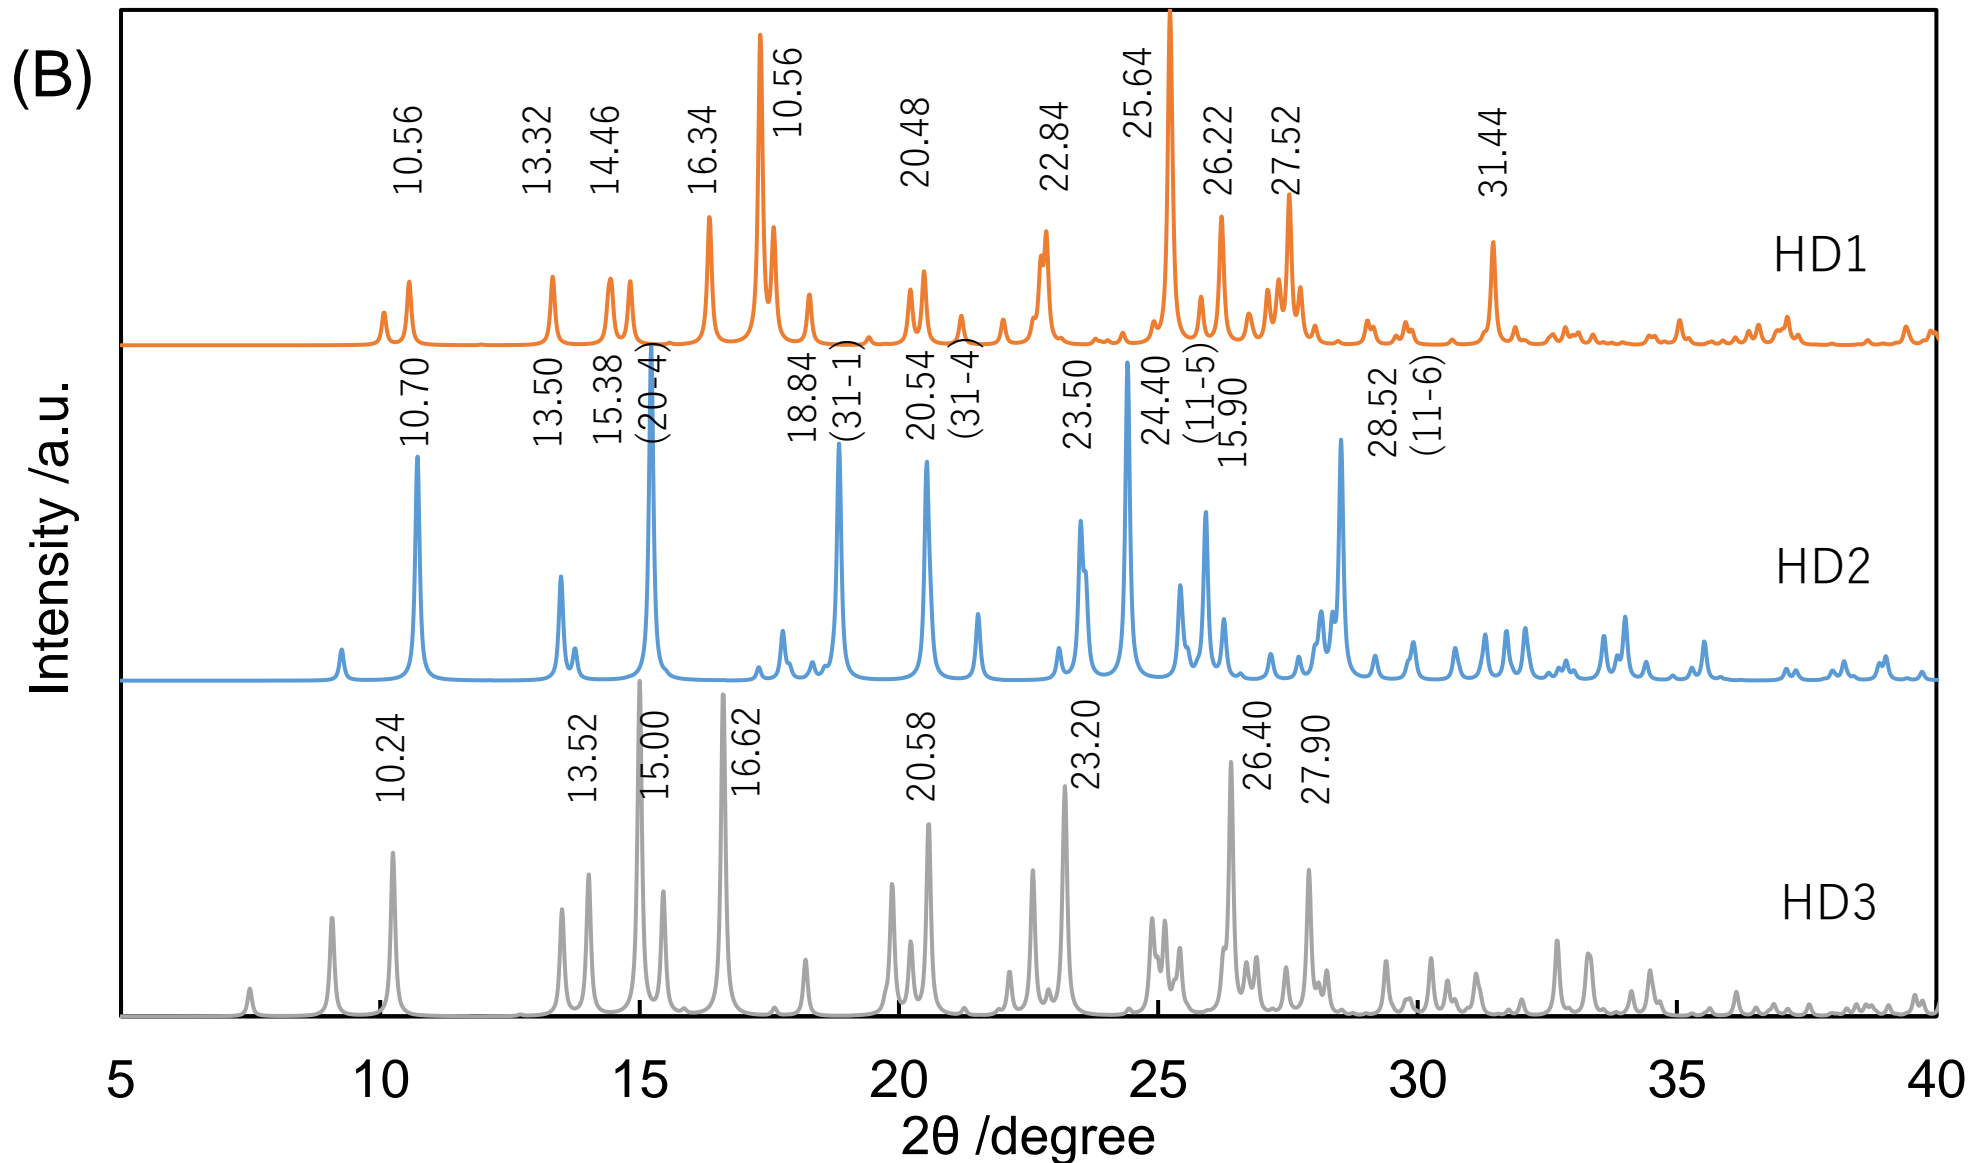

Figure S2(B) The simulated diffractograms of DCF. The corresponding CCDC entries are SIKLIH (P. Moster, et al. 1990) for HD1 crystal, SIKLIH02 (C. Castellari & A. Ottani, 1997) for HD1 , and SIKLIH04 (N. Jaiboon, et al. 2001) for HD3. Numbers were presented 2θ angles and Miller indexes  $h$ ,  $k$ , and  $l$  were in parenthesis.

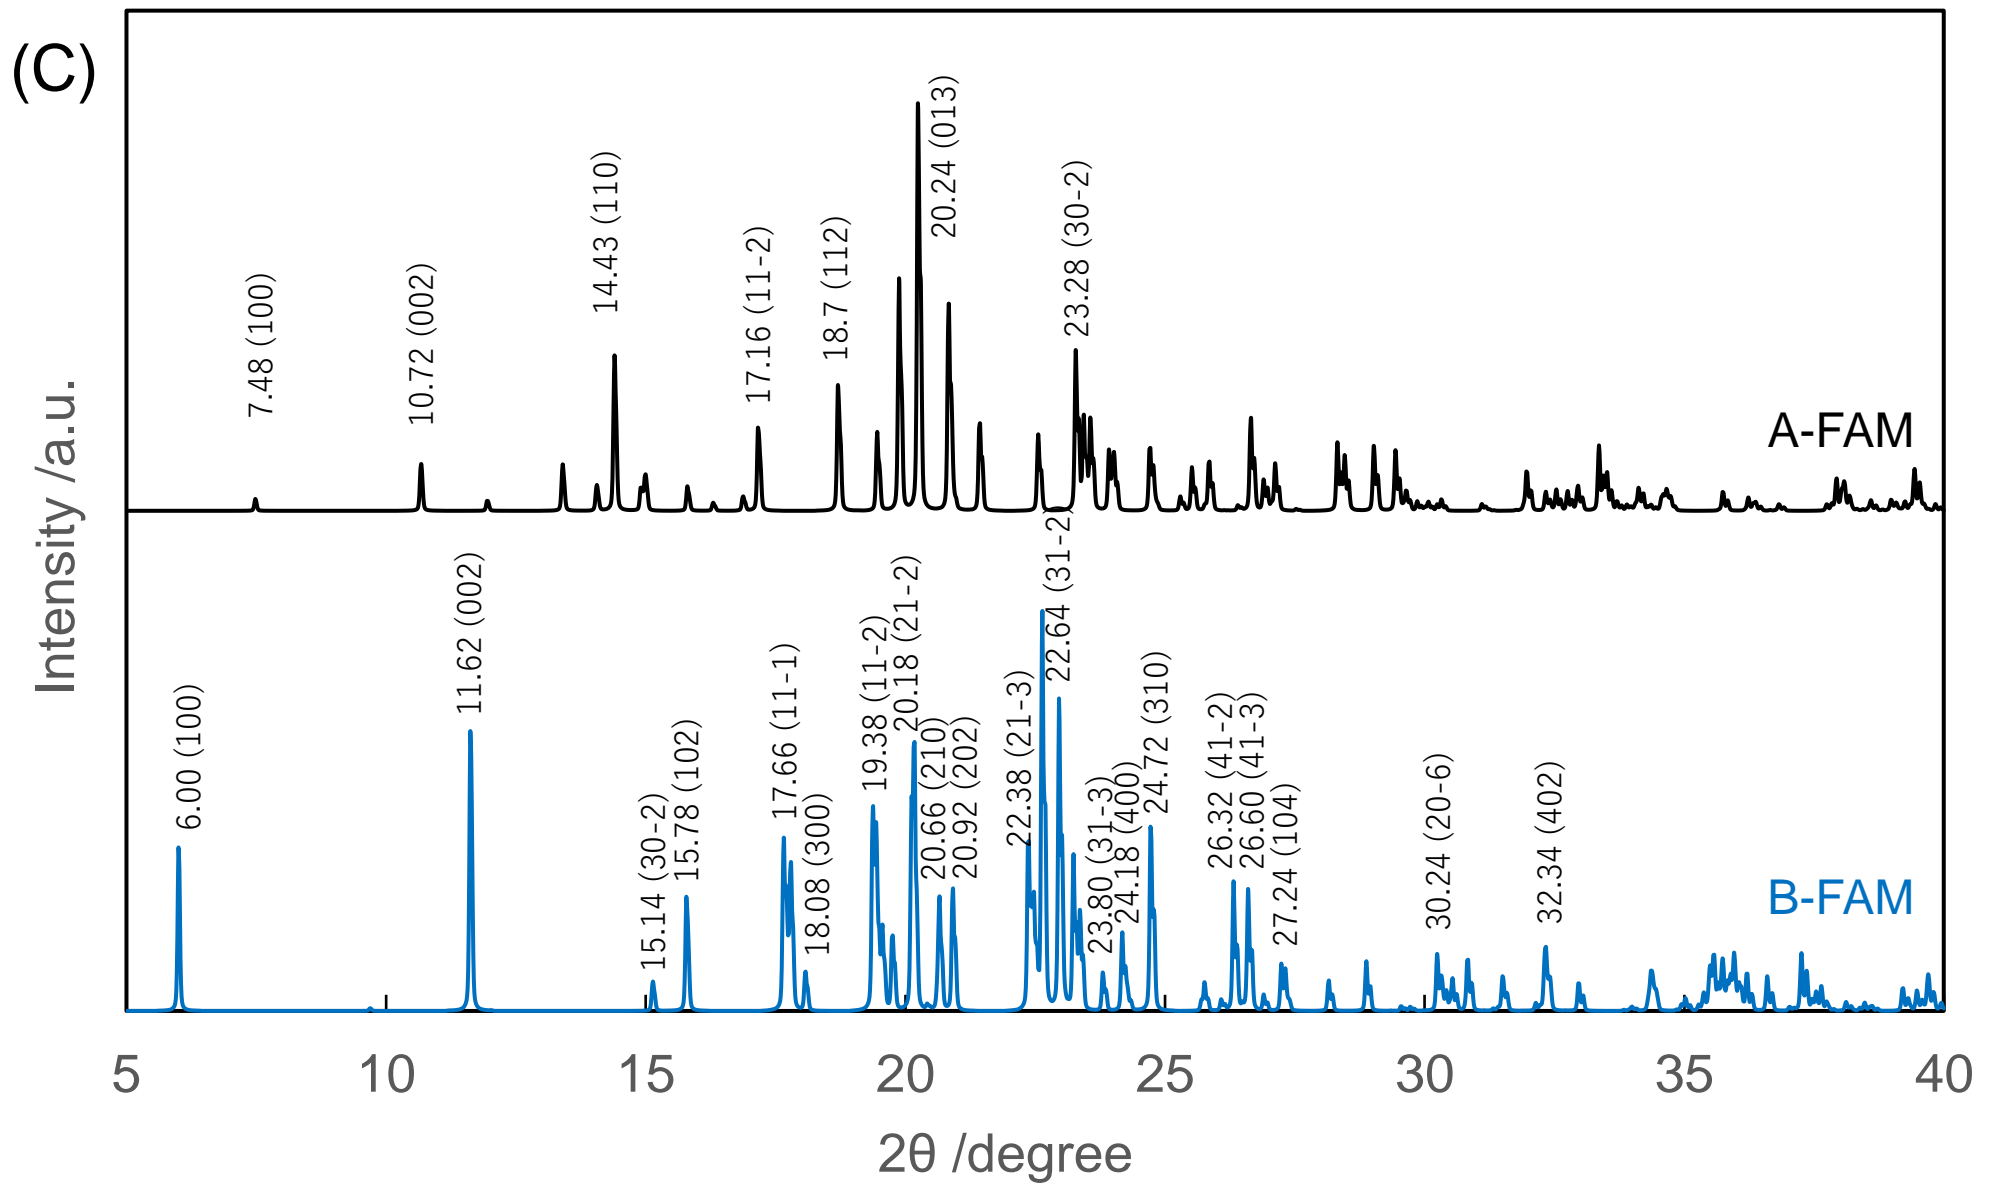

Figure S2(C) The simulated diffractograms of A- (black) and B-FAM (blue). The corresponding CCDC entries are FOGVIG01 (L. Golic, *et al.*, 1989) and FOGVIG02 (K. Shankland, *et al.*, 2002). Numbers were presented 2θ angles and Miller indexes  $h$ ,  $k$ , and  $l$  were in parenthesis.

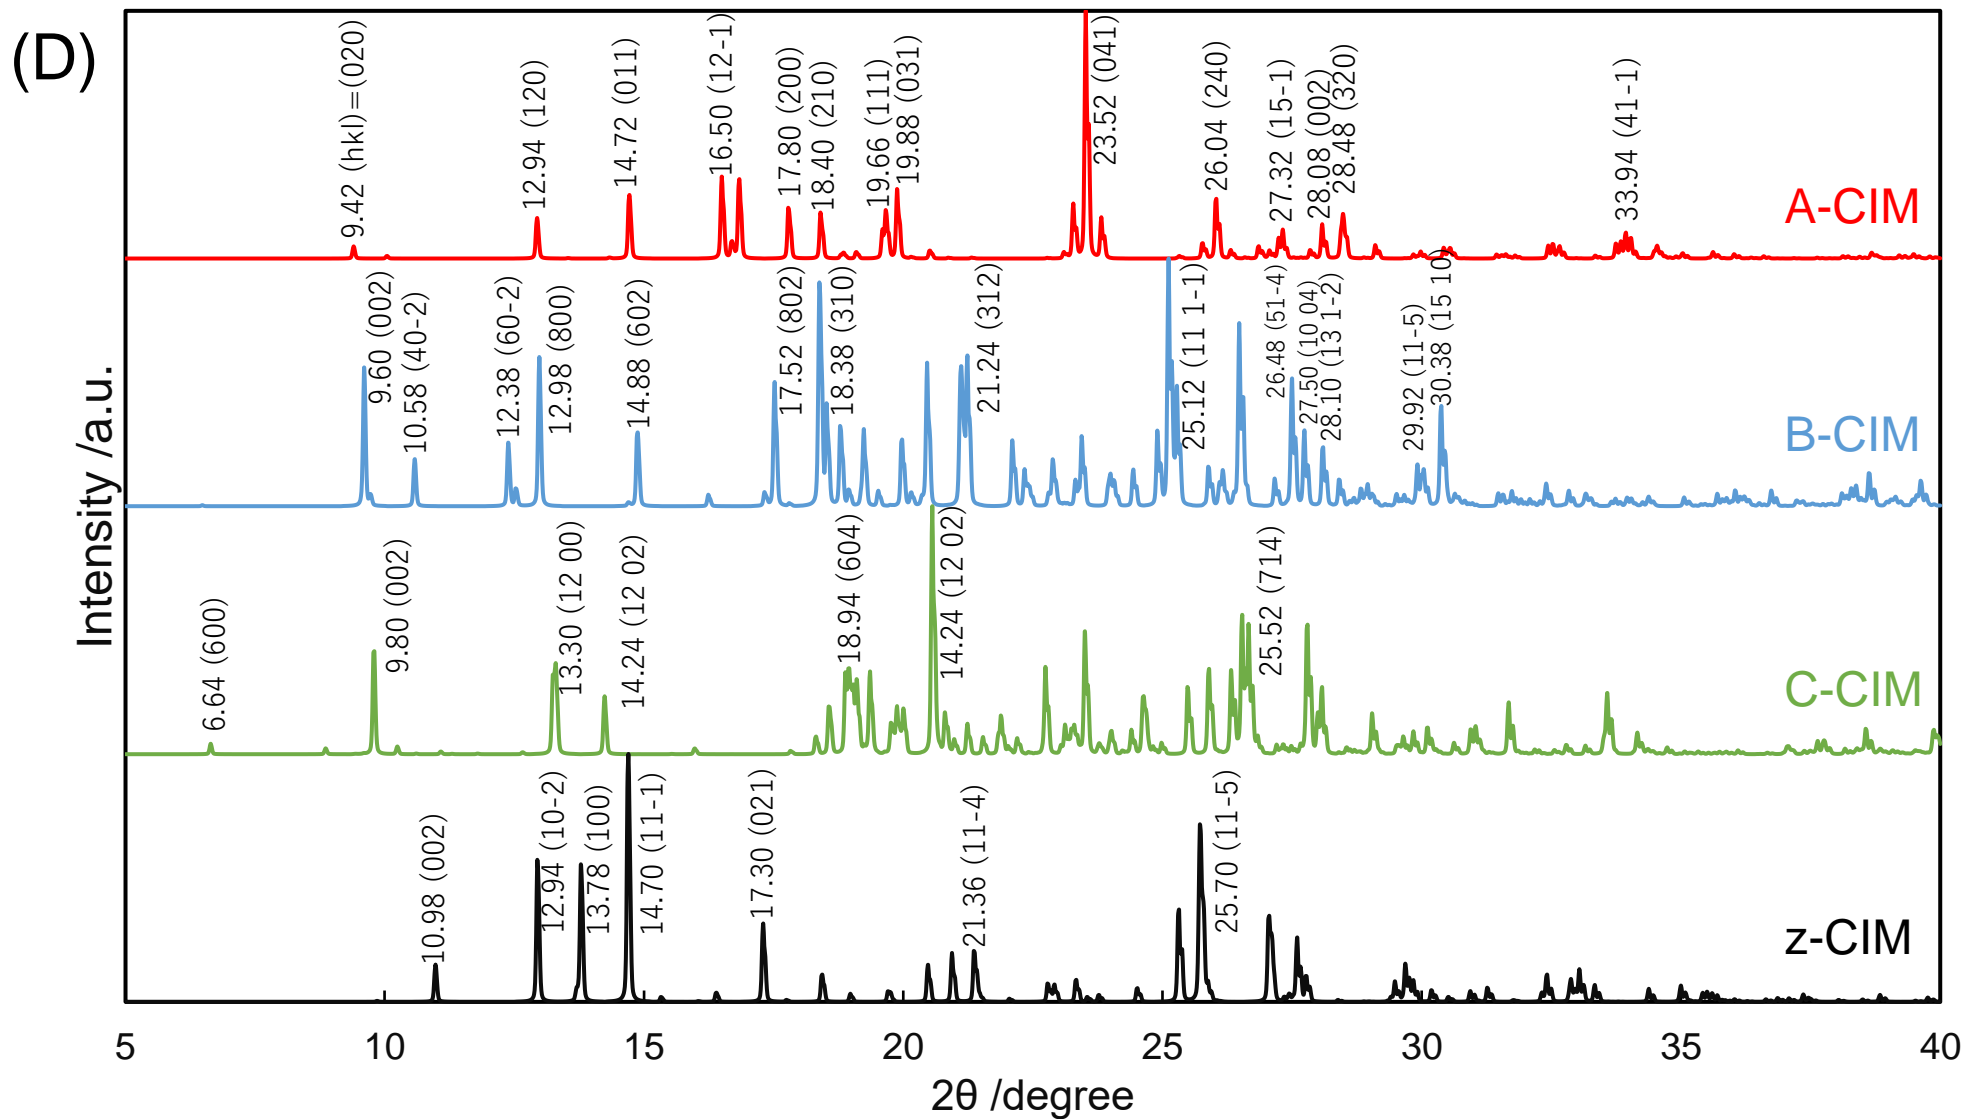

Figure S2(D) The simulated diffractograms of A- (red), B- (blue), C- (green) and z-CIM (black). The corresponding CCDC entries are CIMETD02 (S.R. Critchley, 1979), CIMETD06 (M.C.G. Afonso, *et al.*, 2019), CIMETD04 (A. Arakcheeva, *et al.*, 2013) and CIMETD01 (L.Parkanyi, *et al.*, 1984).

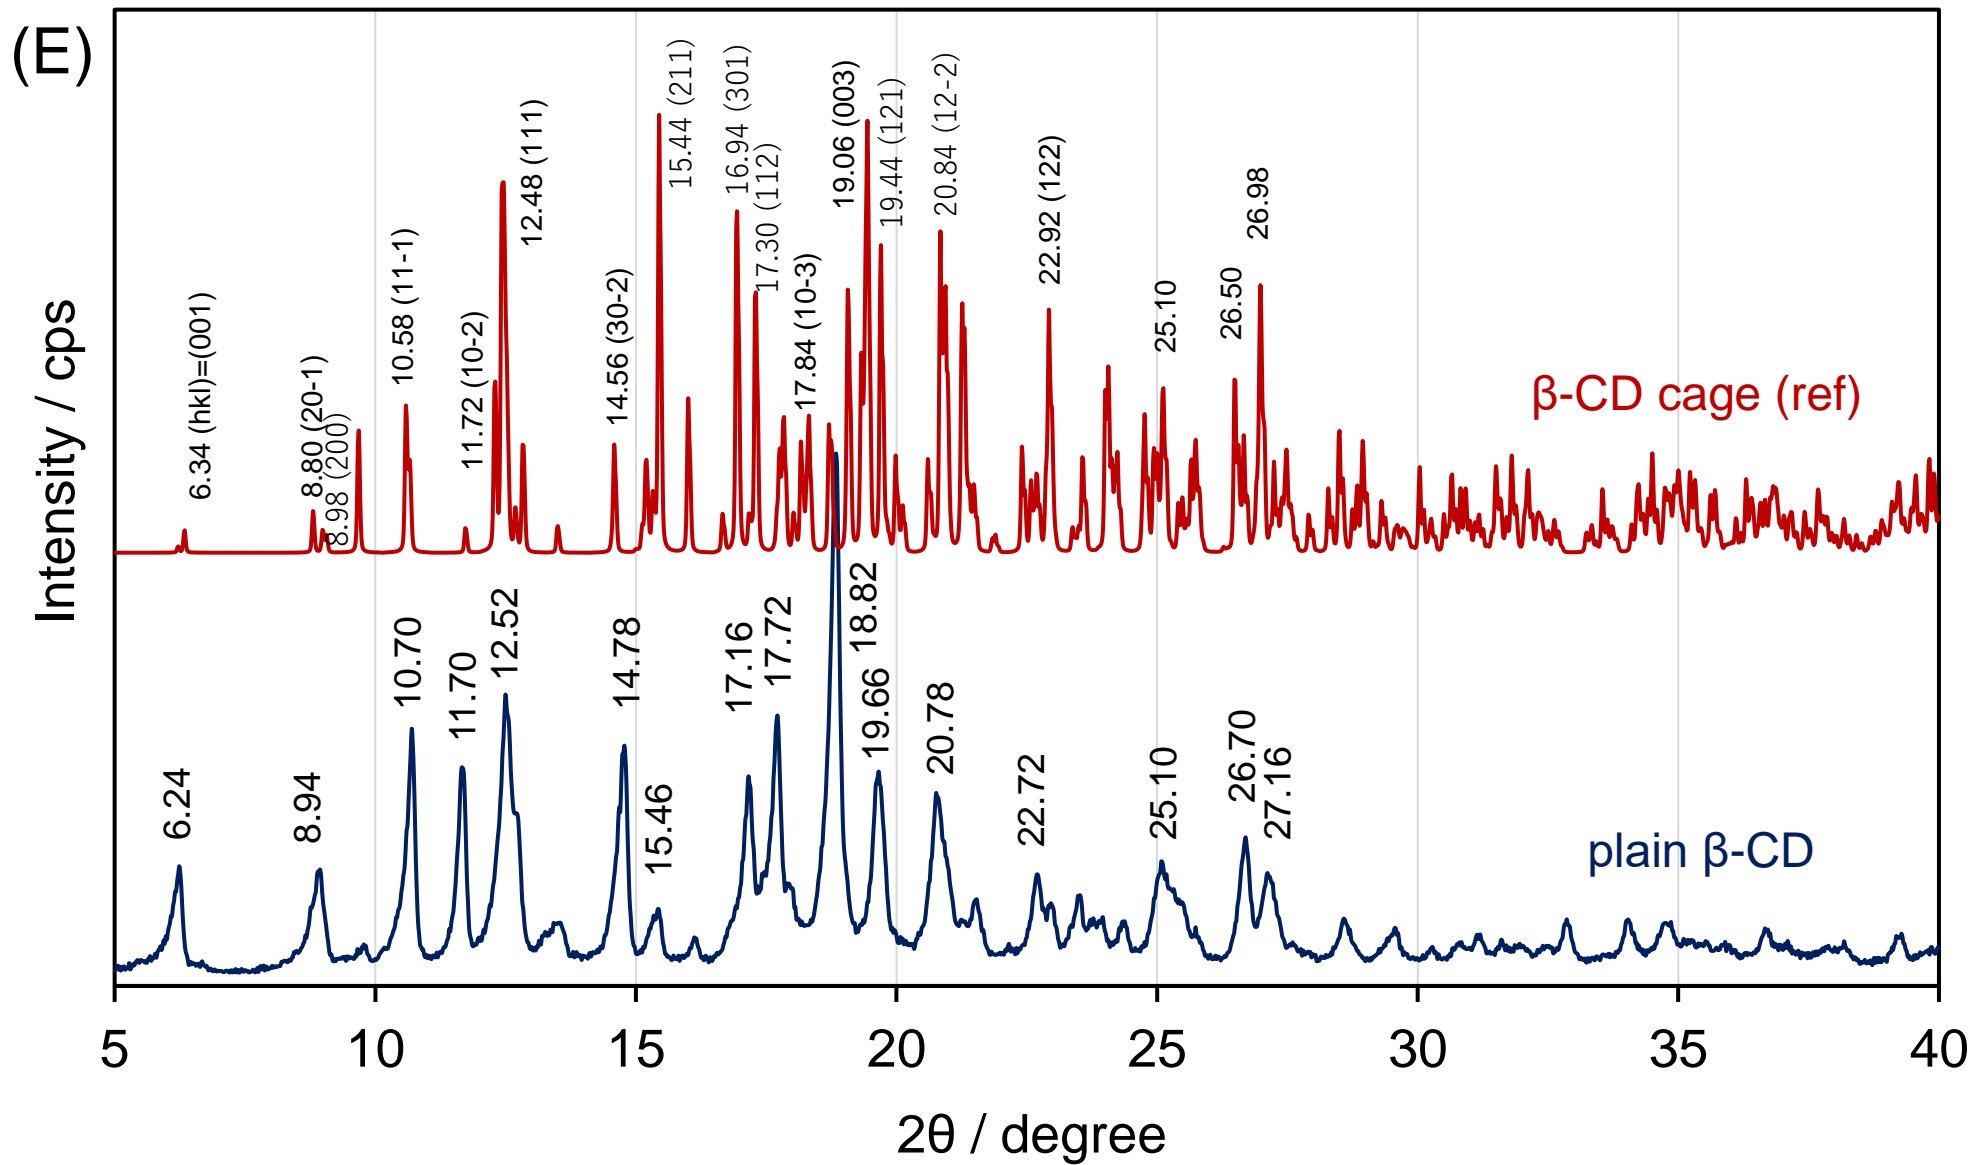

Figure S2(E) The simulated diffractograms of the  $\beta$ -CyD cage (burgundy), corresponding to the CCDC entry BCDEXD03 (T.Steiner *et al.*, 1994), and the observed pattern of the plain  $\beta$ -CD with a cage form.

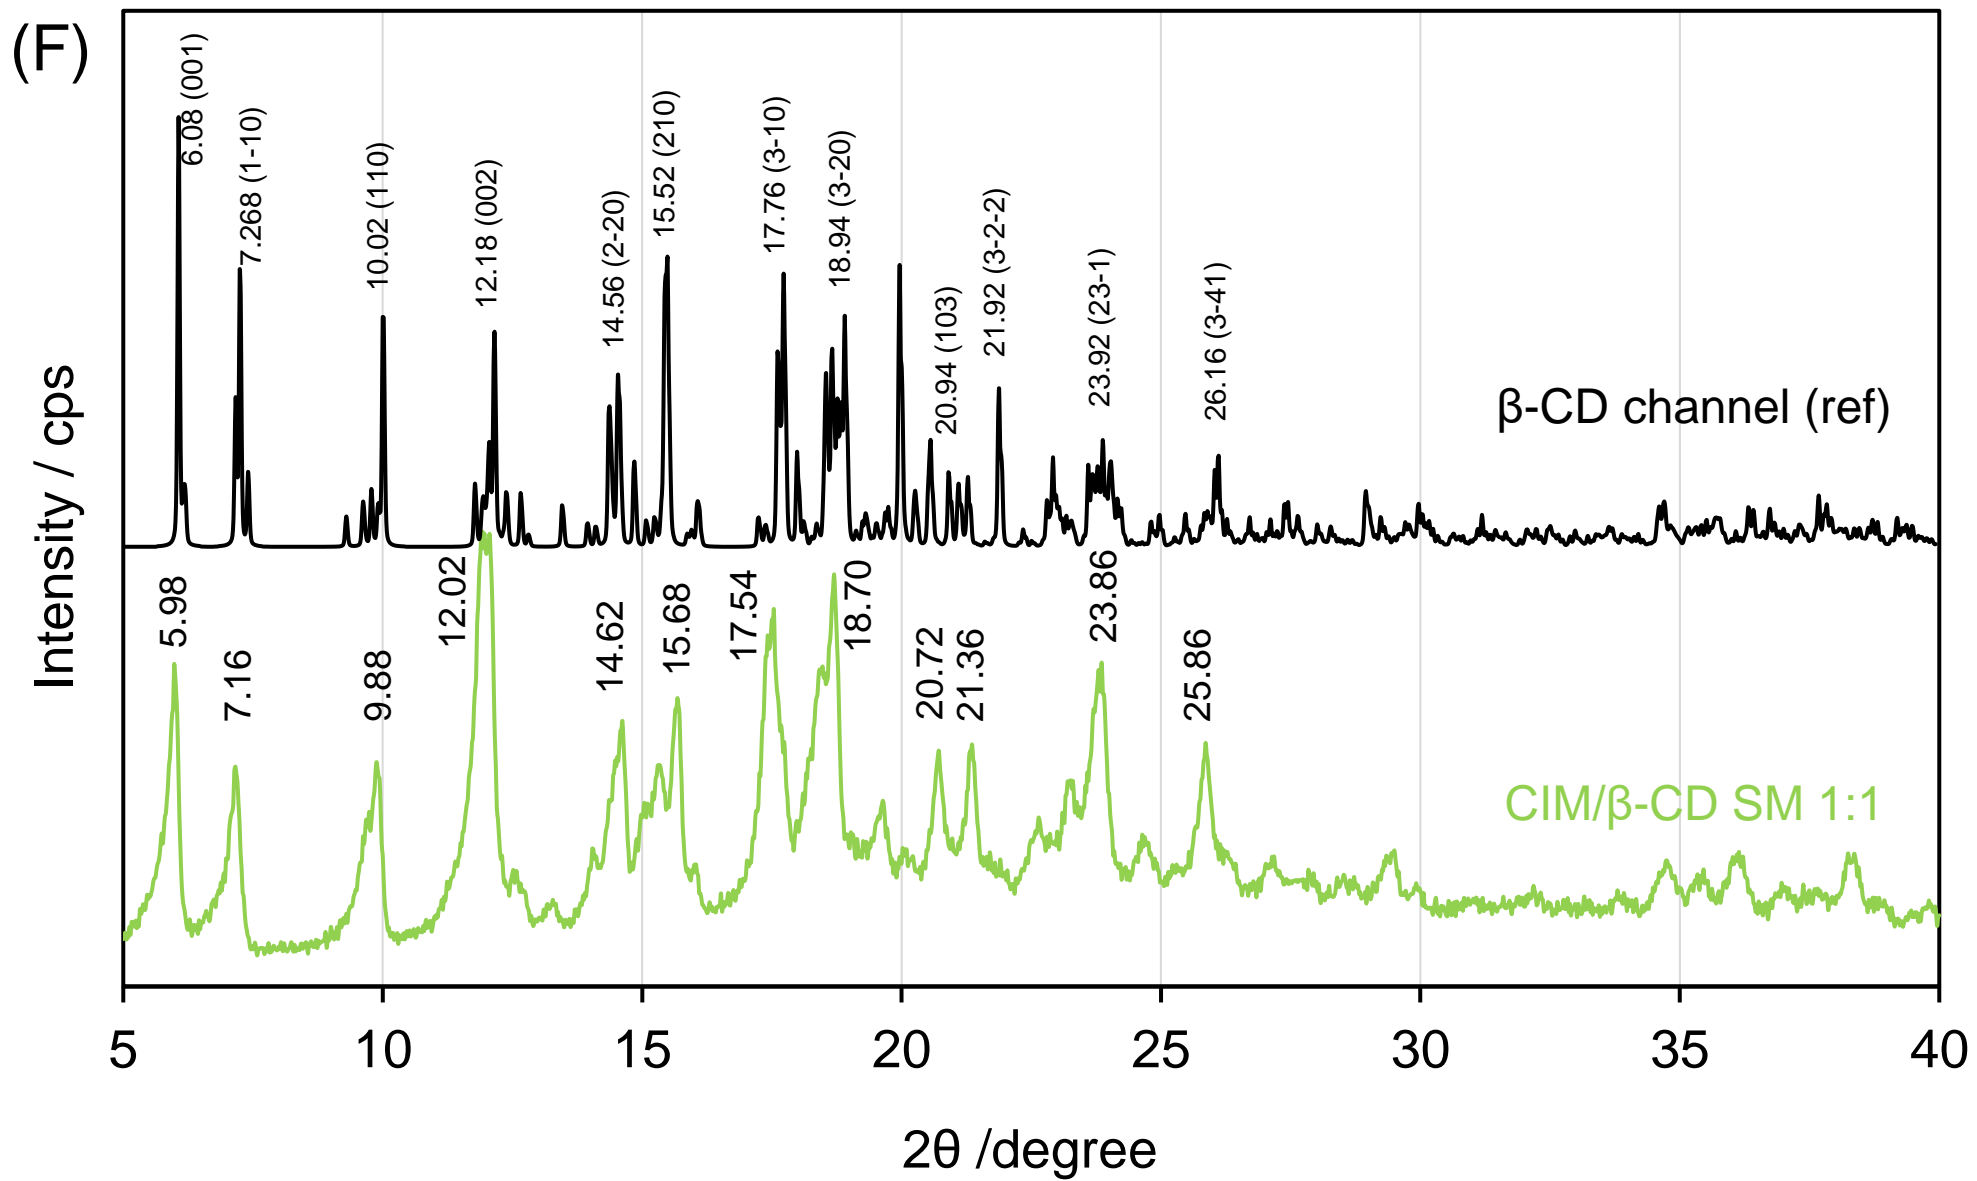

Figure S2(F) The simulated diffractograms of the  $\beta$ -CyD channel (black) corresponding to the CCDC entry OFAXID (E-J. Wang *et al.*, 2007), and the observed pattern of CIM/ $\beta$ -CD with a channel form?

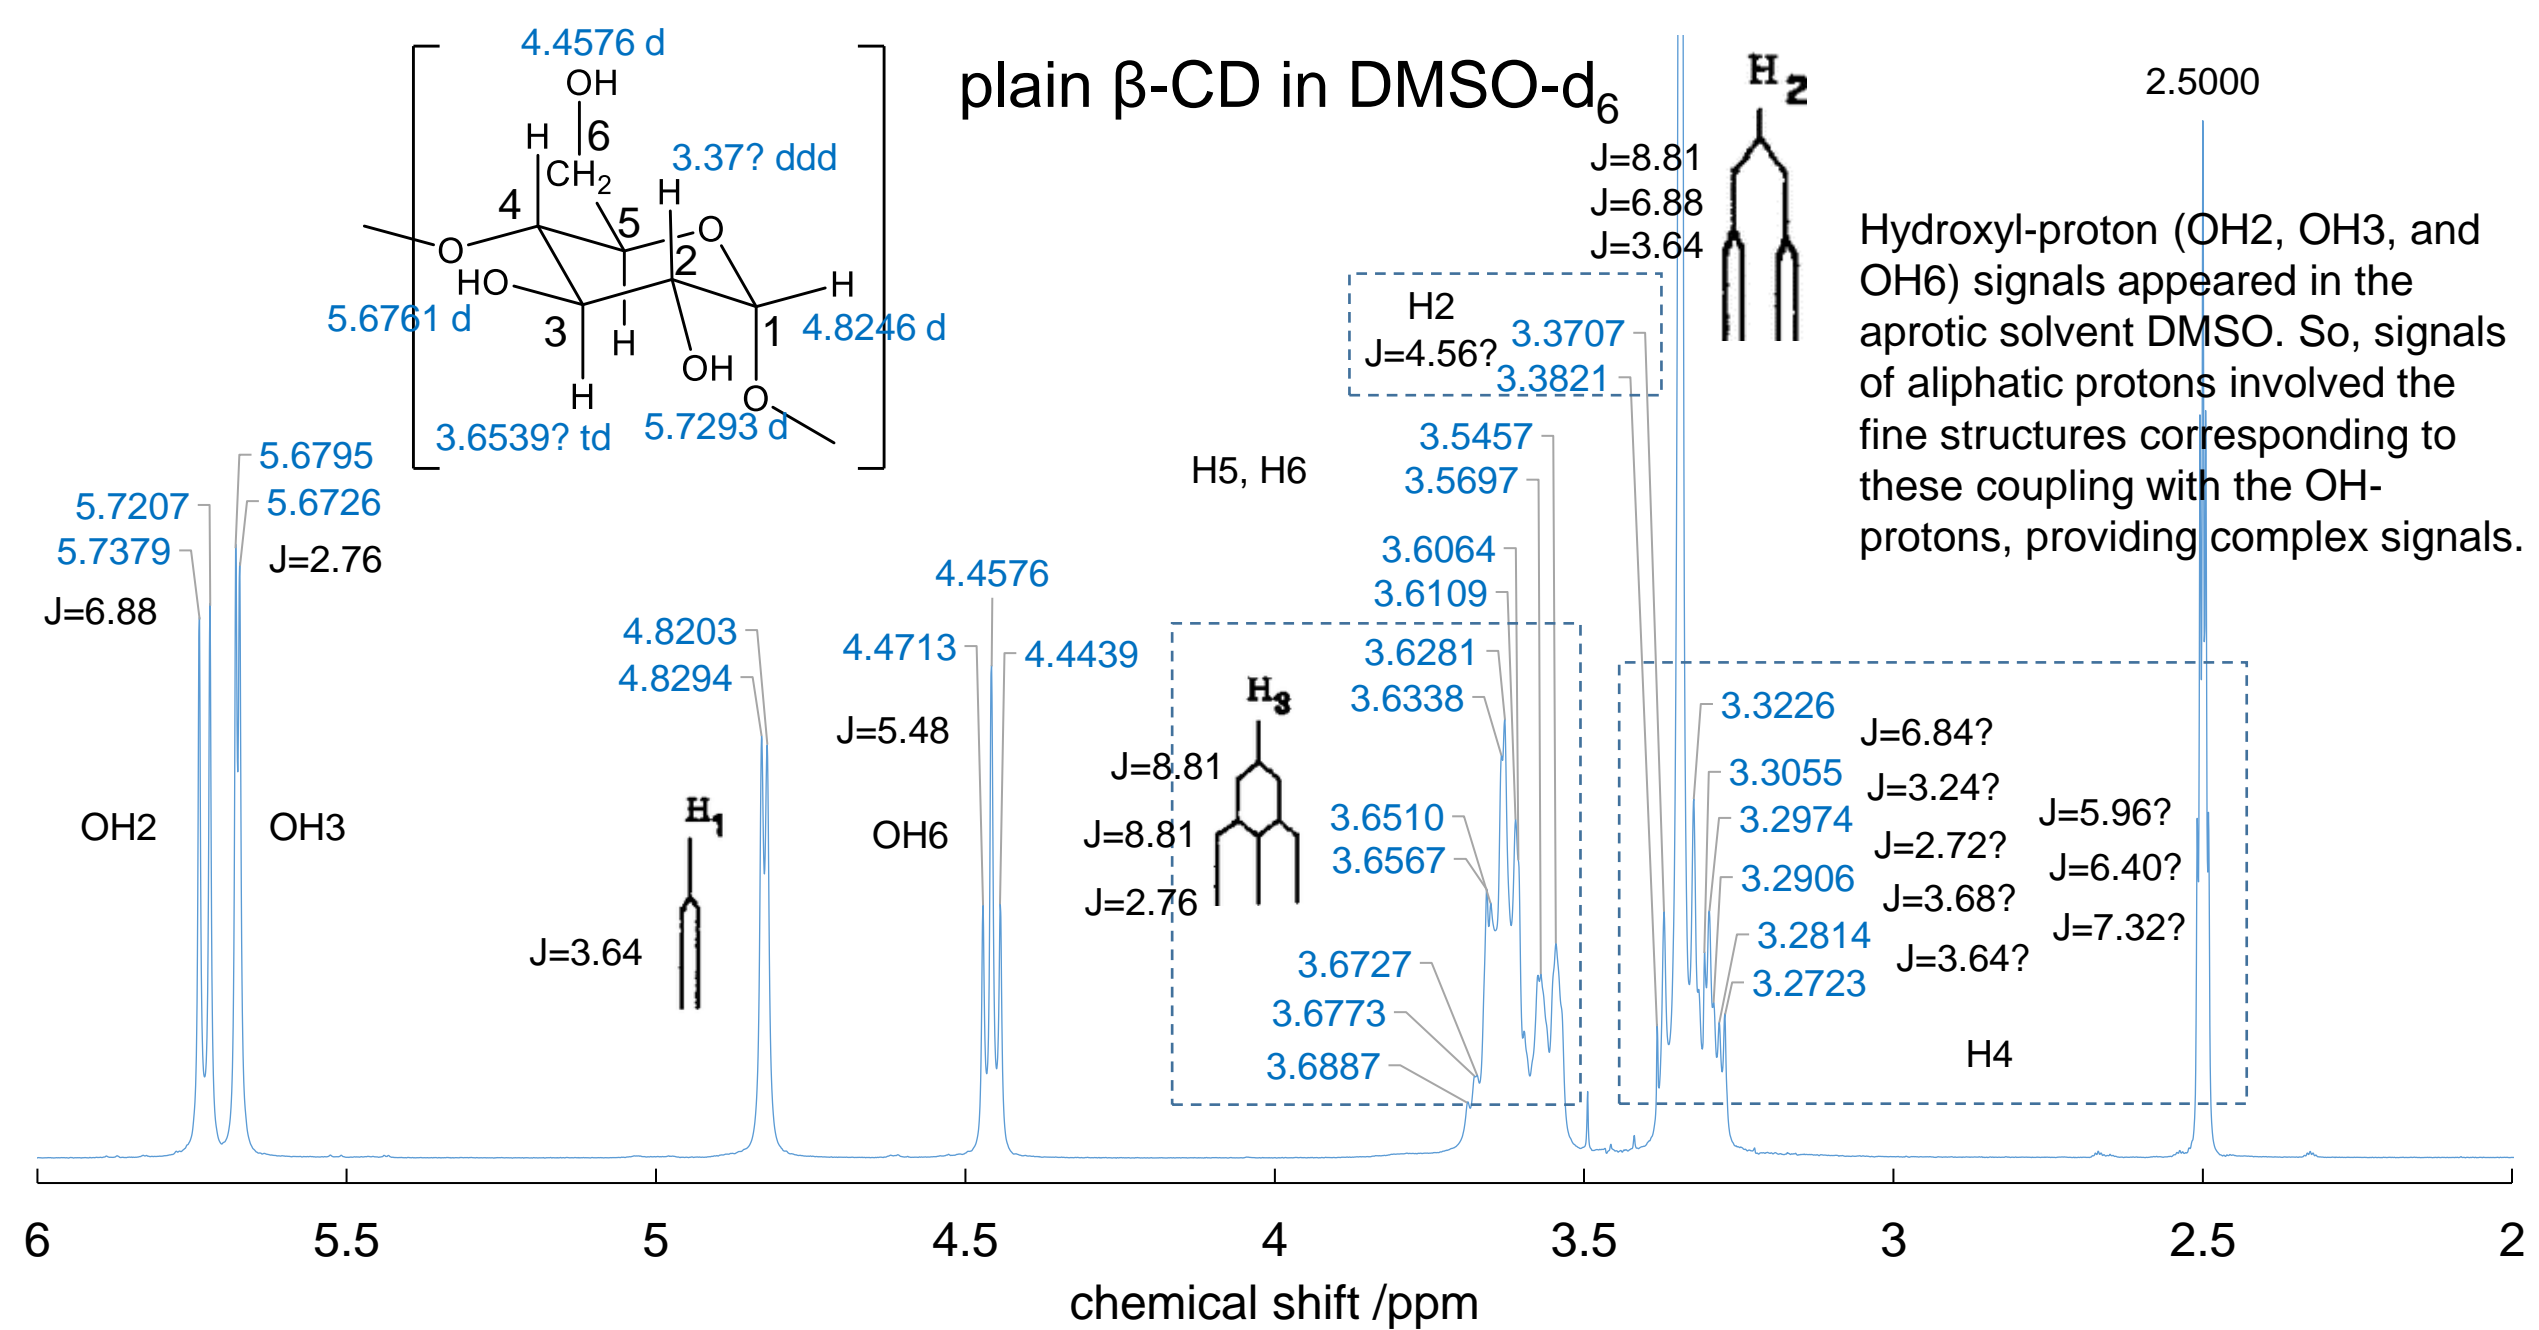

Figure S3(A) The 400 MHz  $^1\text{H}$ -NMR spectrum of the plain  $\beta$ -CD in DMSO- $d_6$



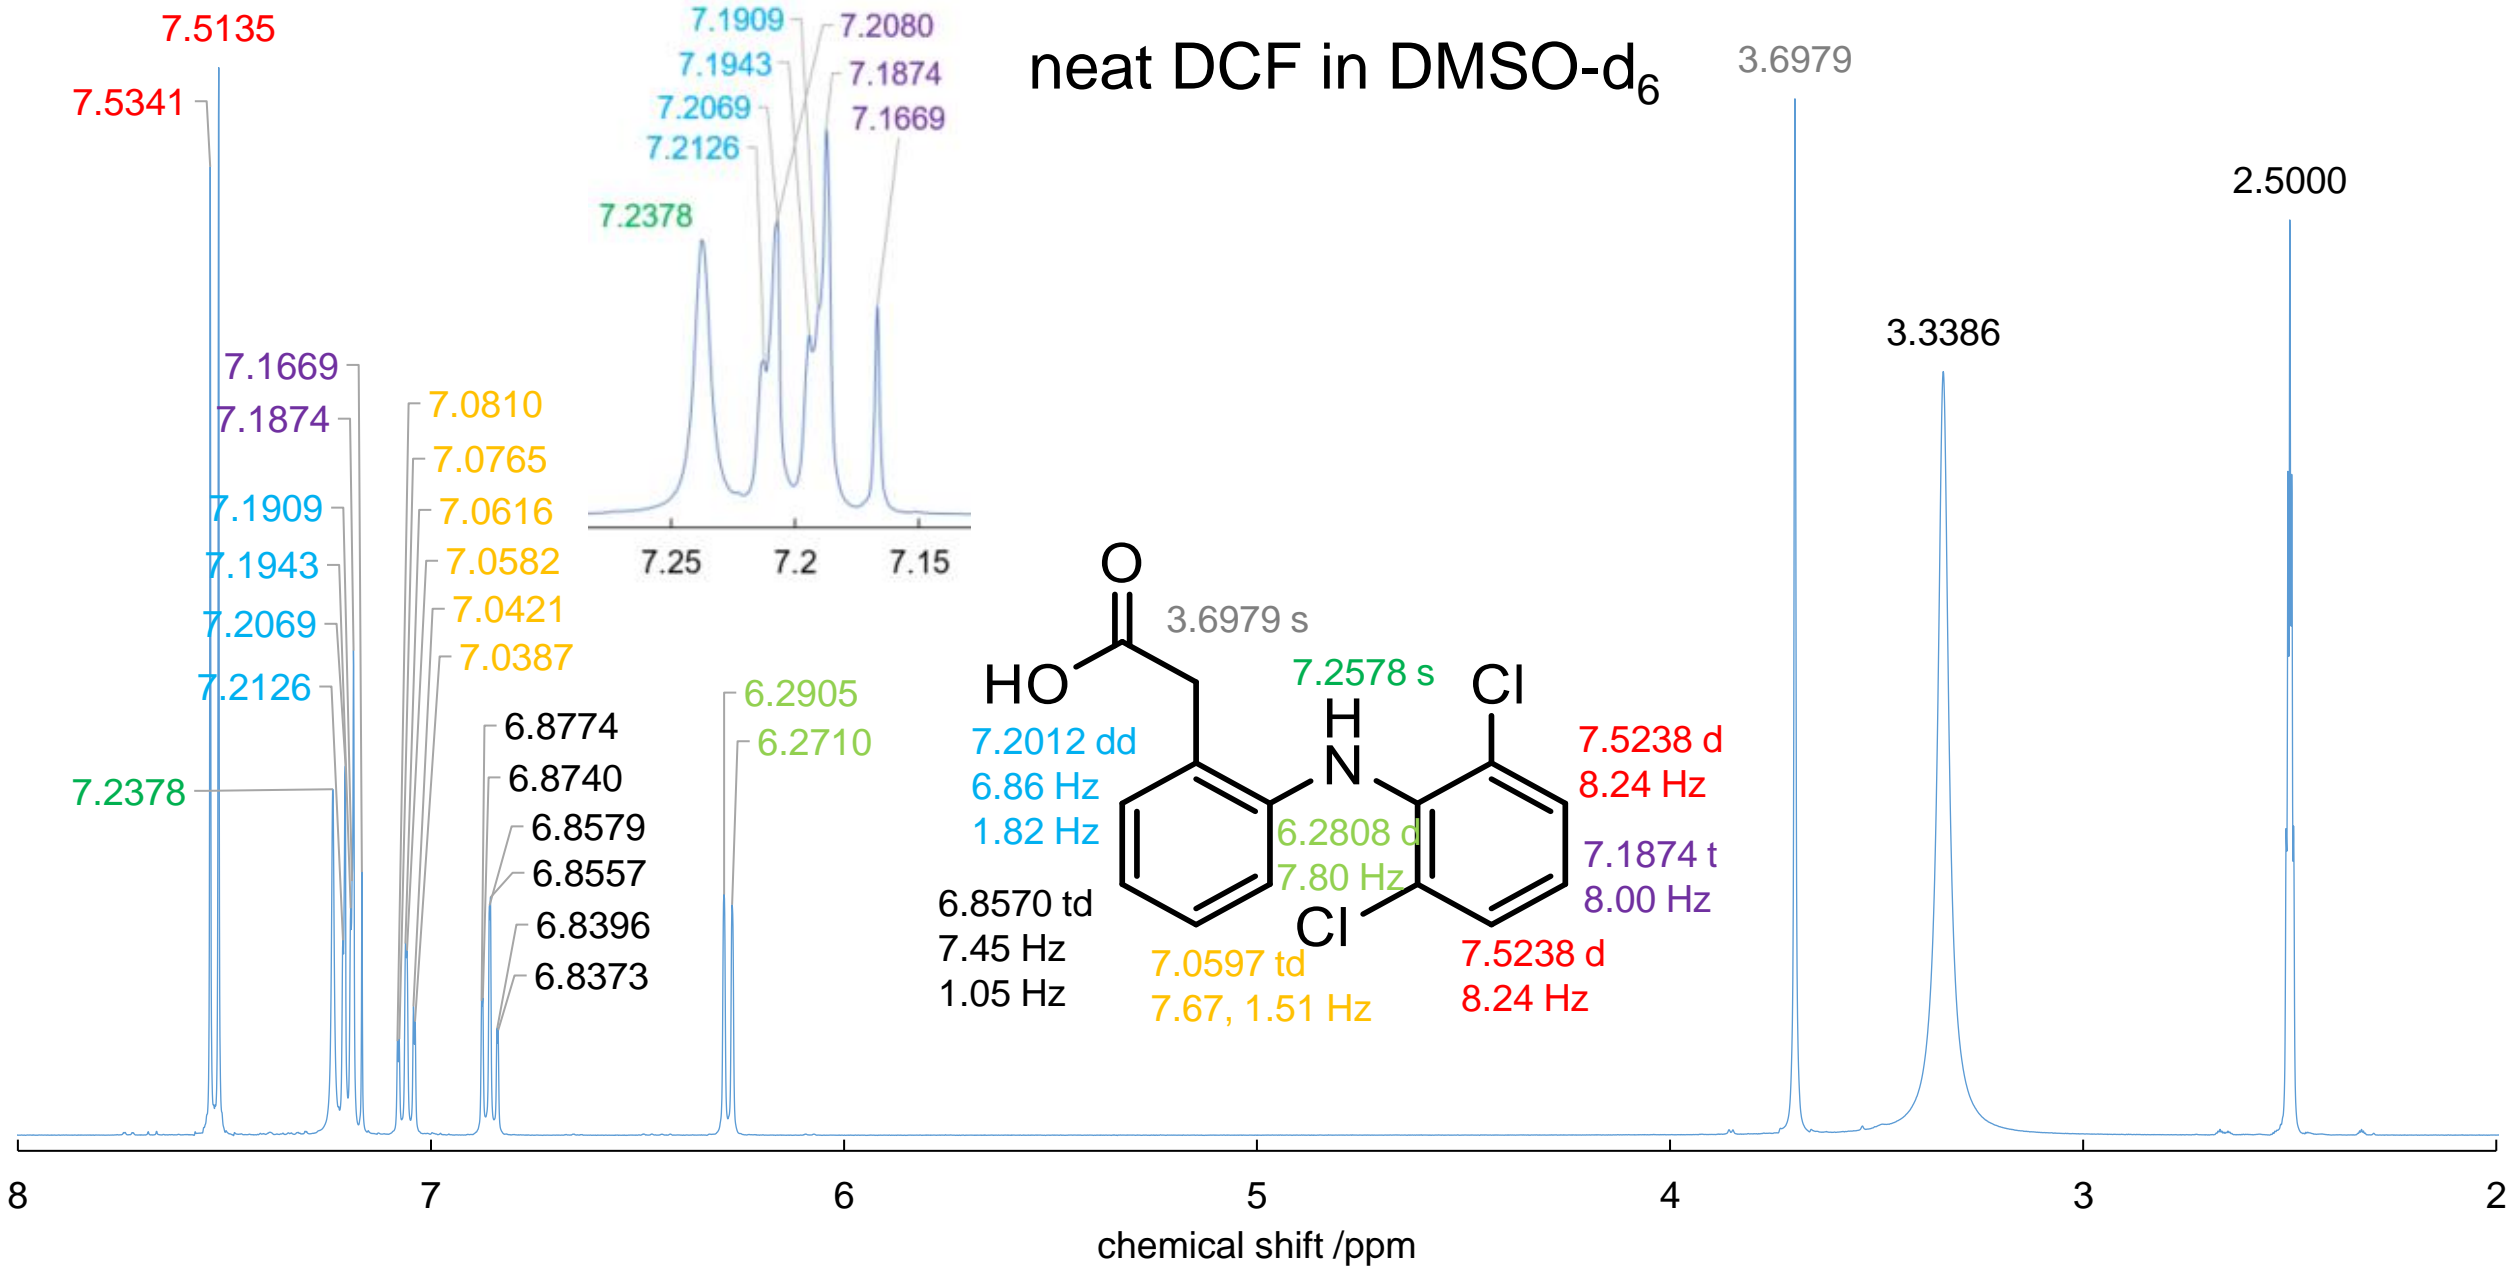

Figure S3(B) The 400 MHz <sup>1</sup>H-NMR spectrum of the neat DCF in DMSO-d<sub>6</sub>

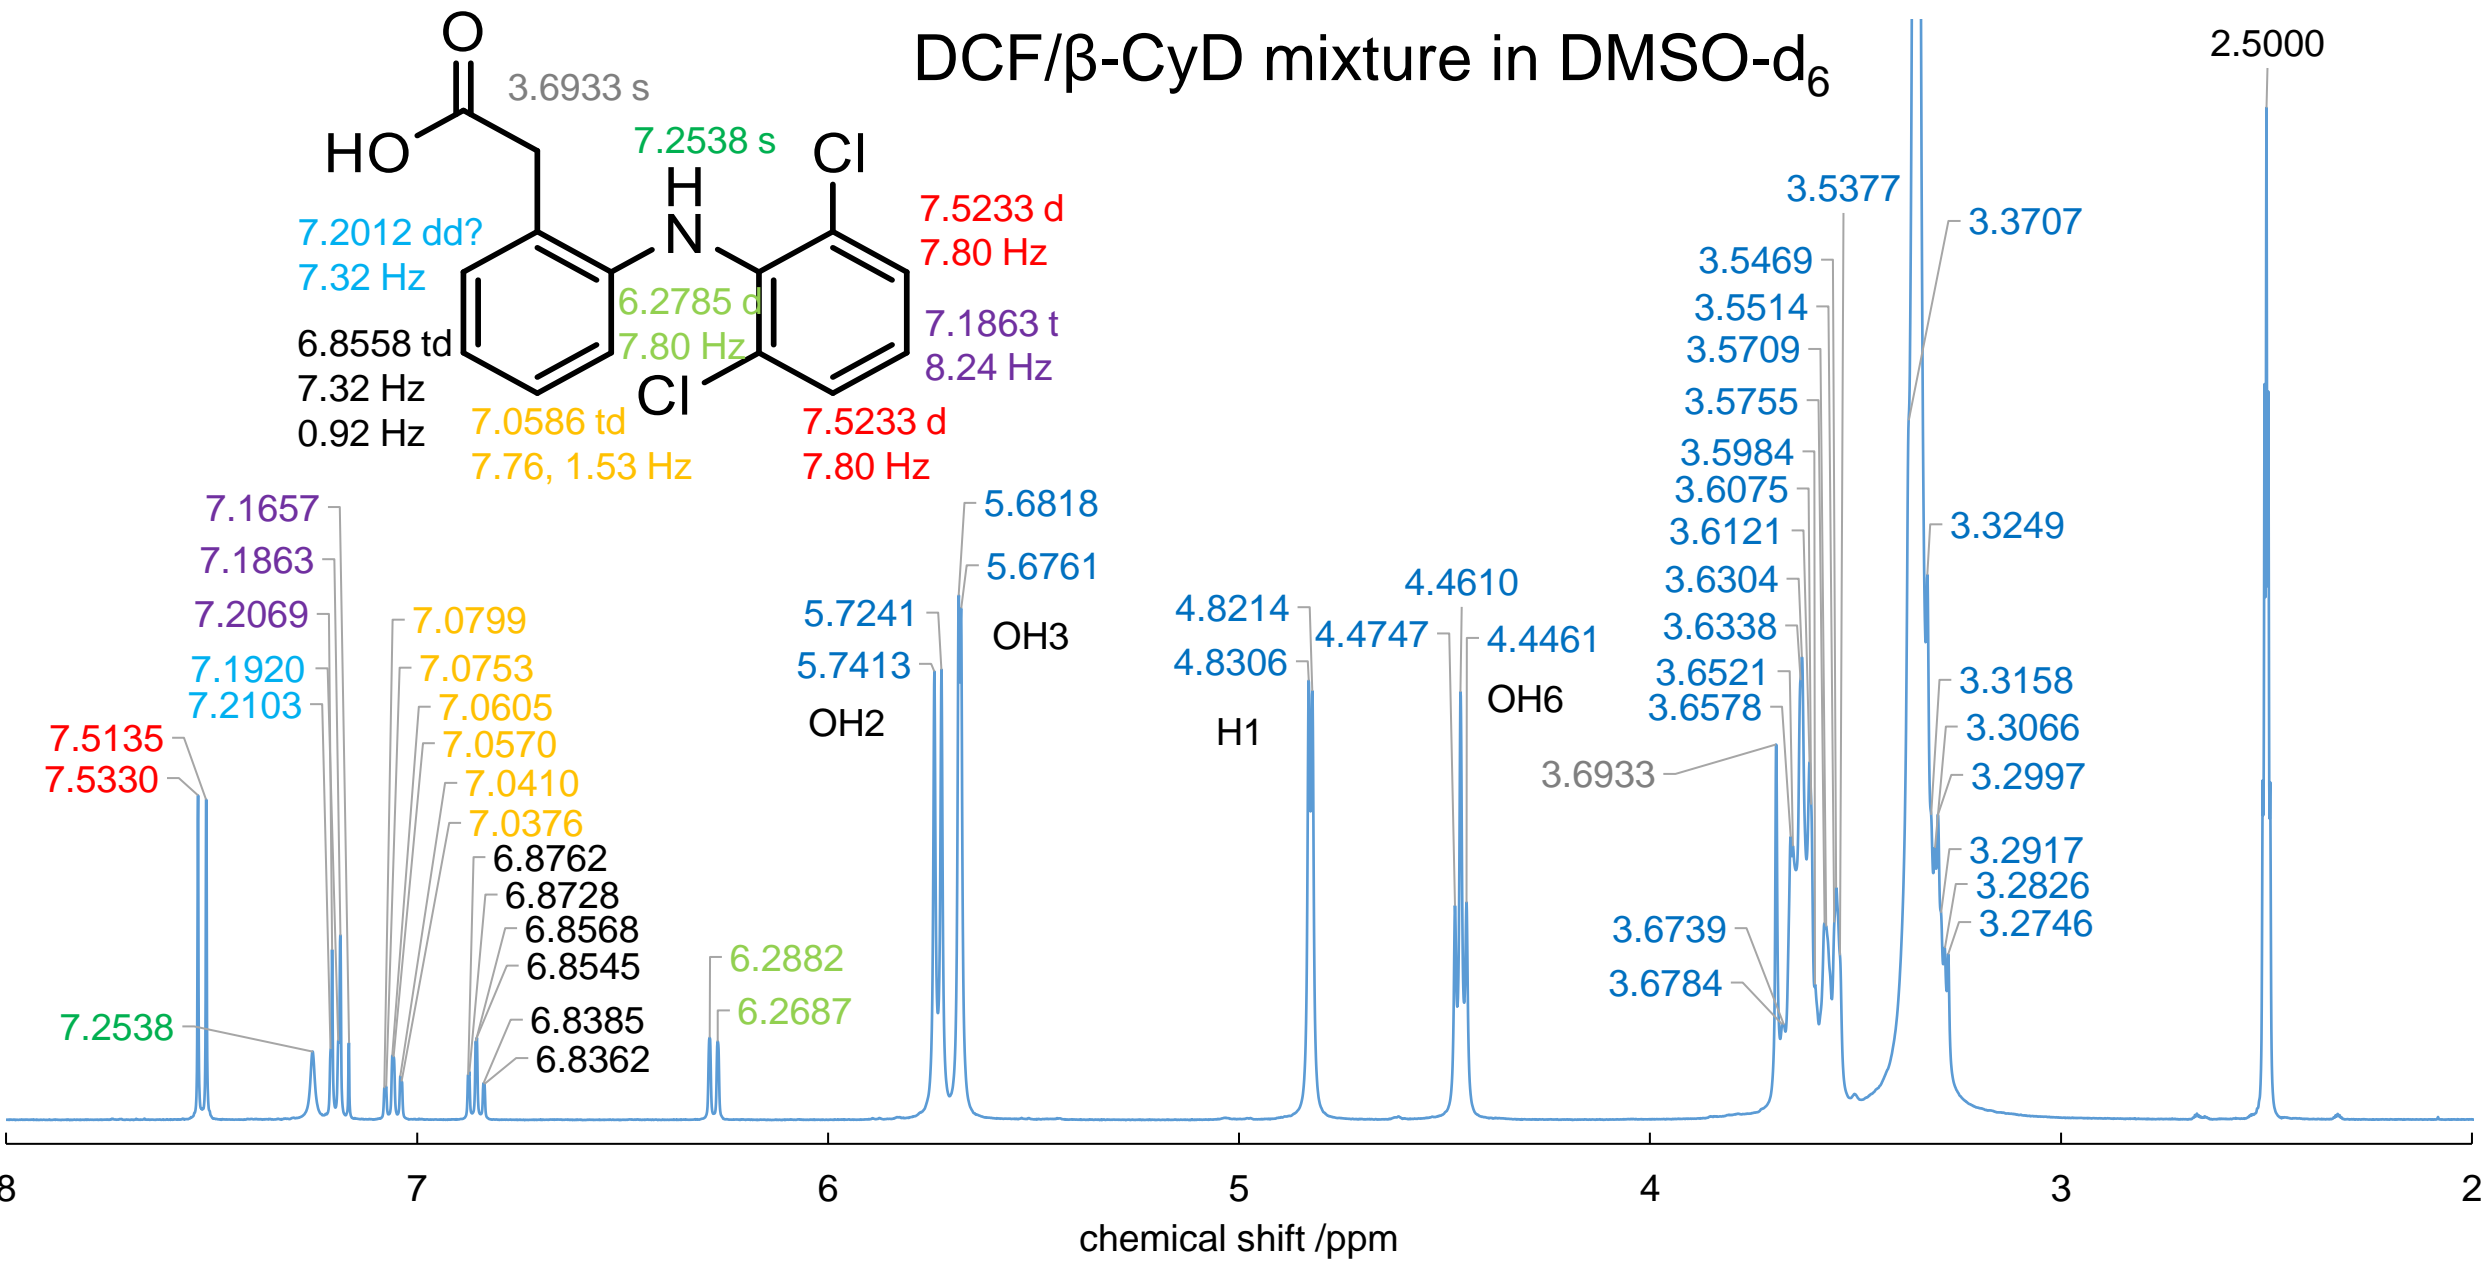

Figure S3(C) The 400 MHz <sup>1</sup>H-NMR spectrum of the DCF/ $\beta$ -CD mixture in DMSO-d<sub>6</sub>

neat FAM in DMSO-d<sub>6</sub>

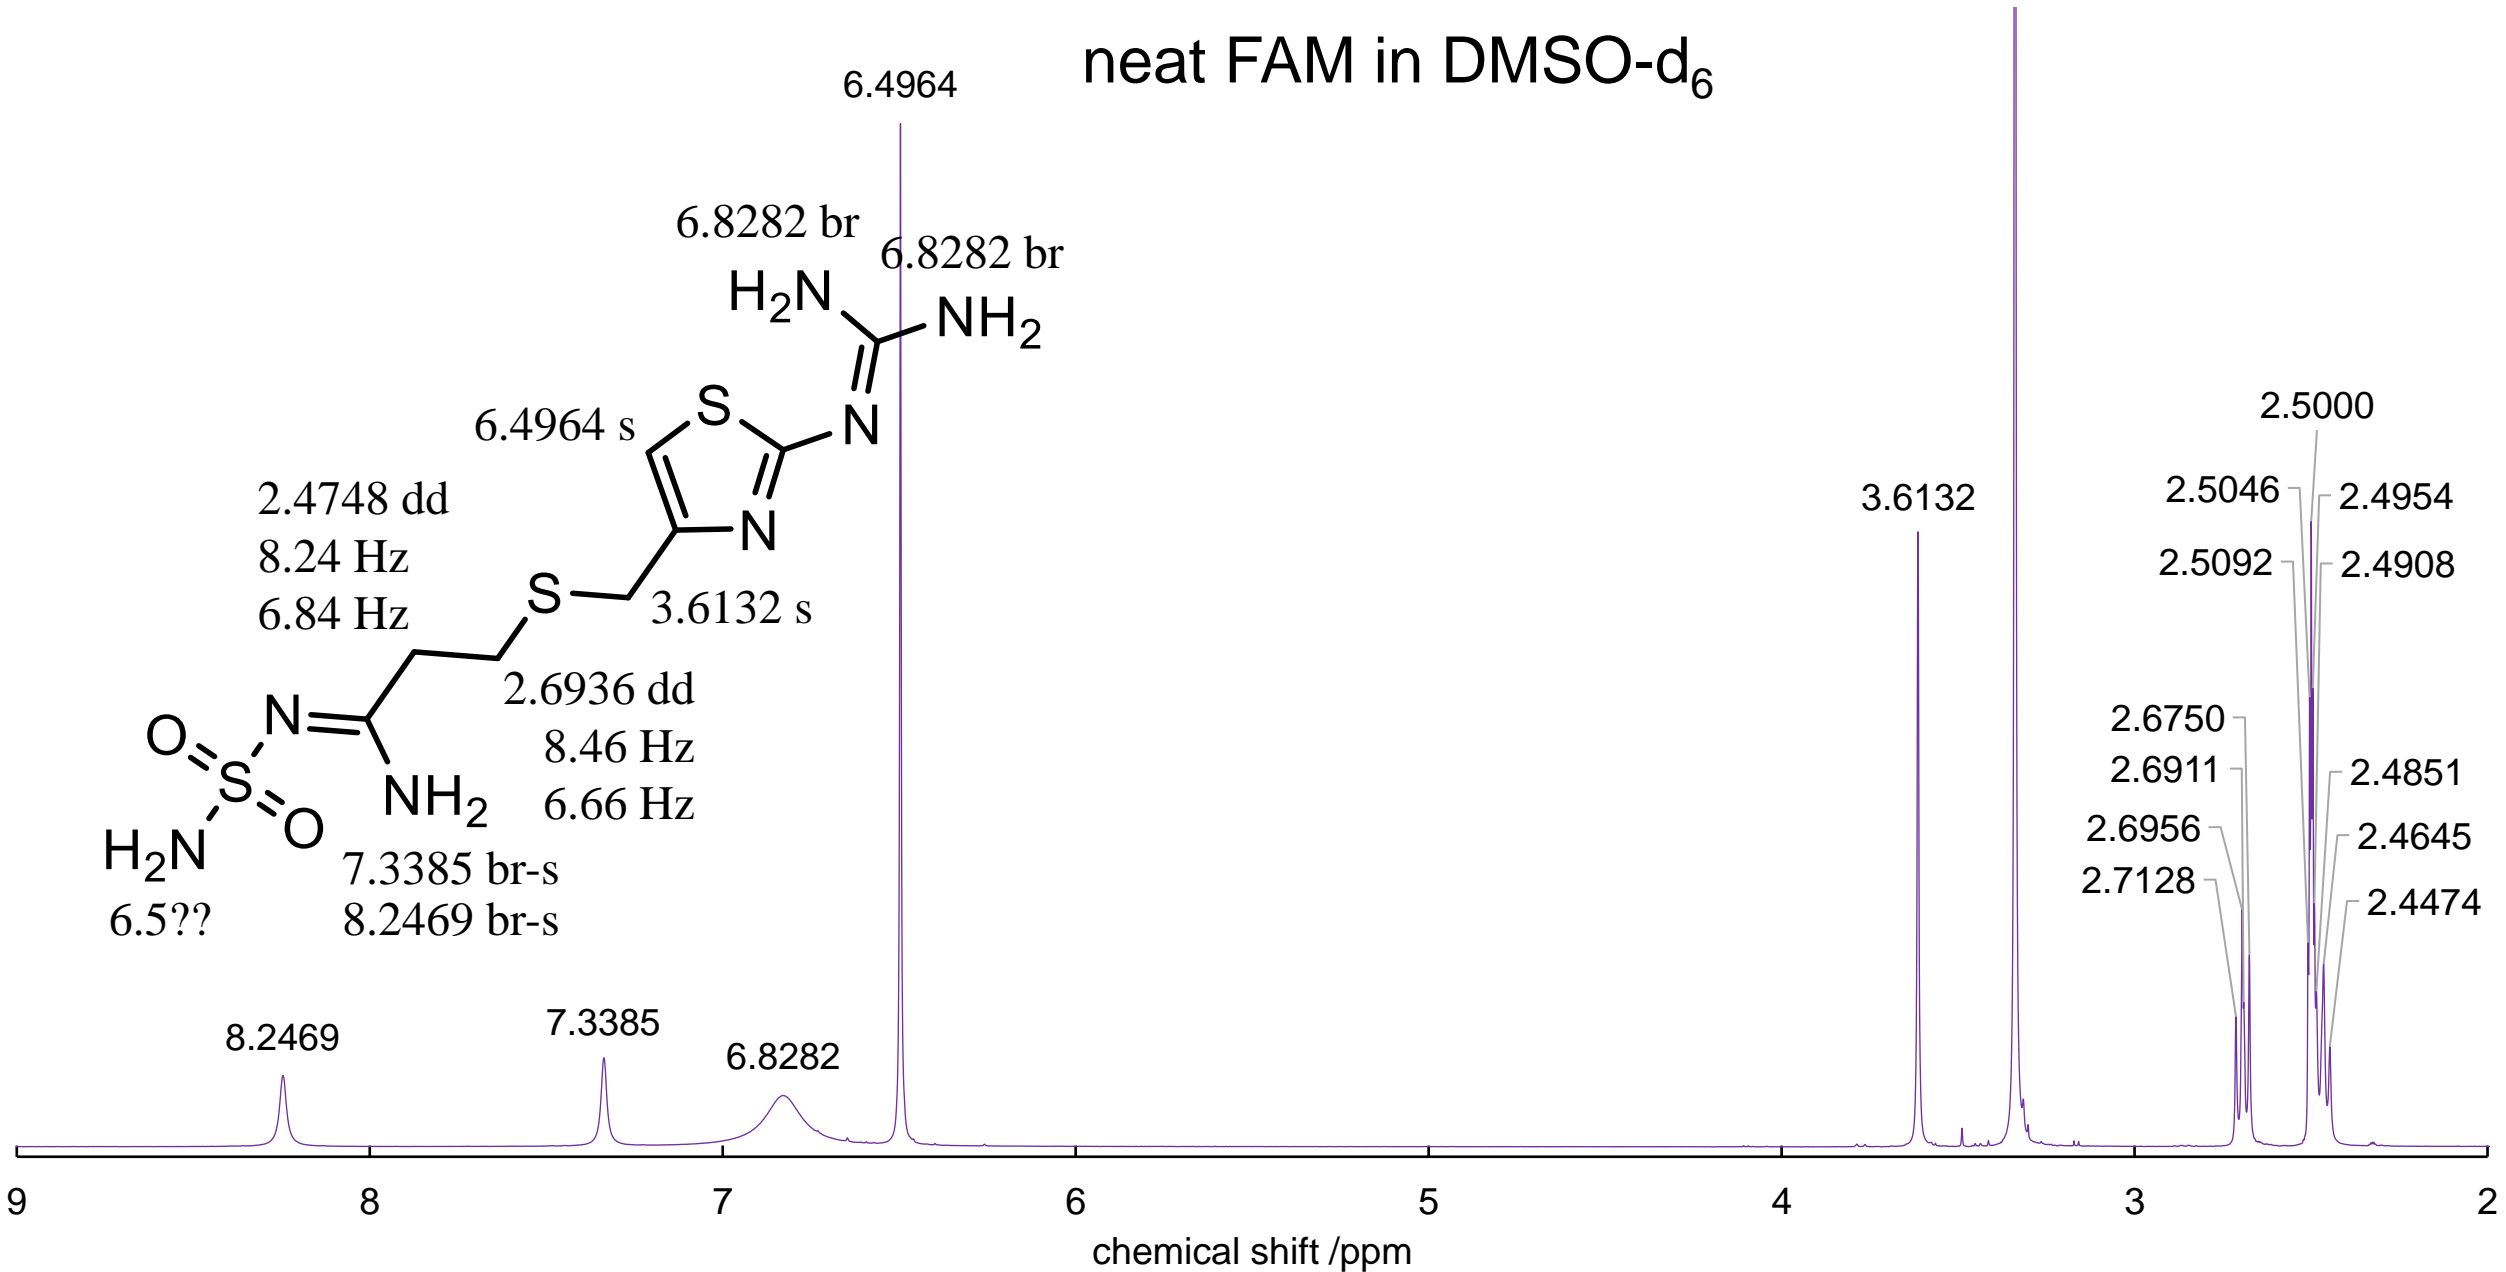

Figure S3(D) The 400 MHz <sup>1</sup>H-NMR spectrum of the neat FAM in DMSO-d<sub>6</sub>

# FAM/ $\beta$ -CD mixture in DMSO-d<sub>6</sub>

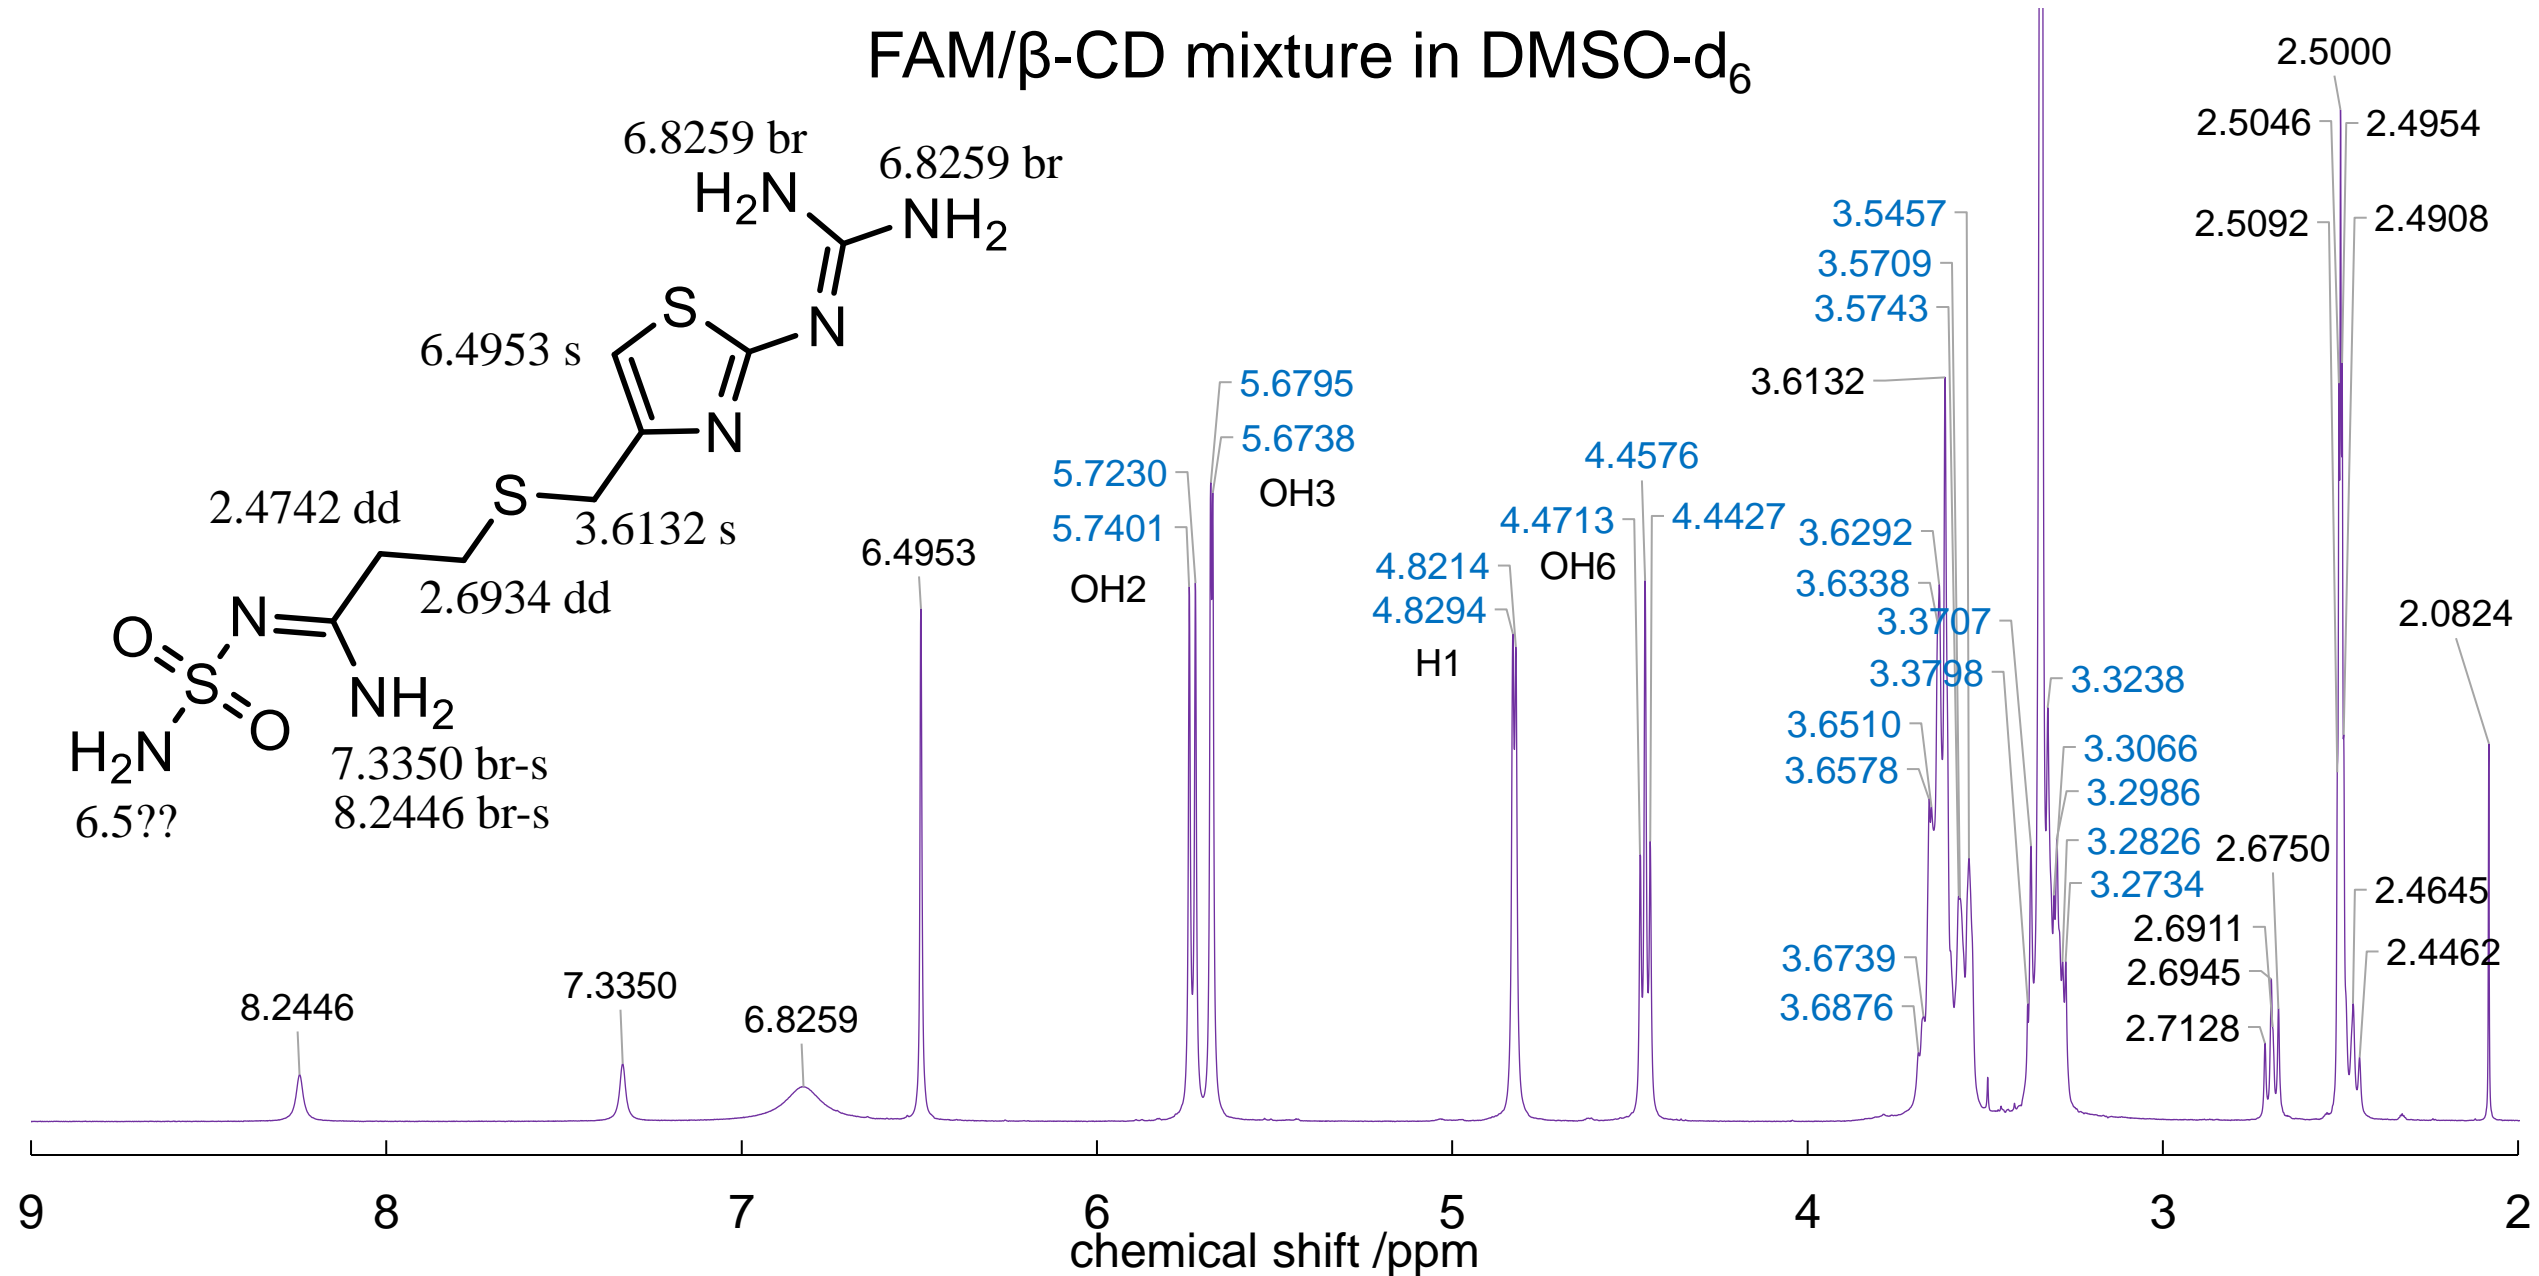

Figure S3(E) The 400 MHz <sup>1</sup>H-NMR spectrum of the FAM/ $\beta$ -CD mixture in DMSO-d<sub>6</sub>

plain  $\beta$ -CyD in D<sub>2</sub>O

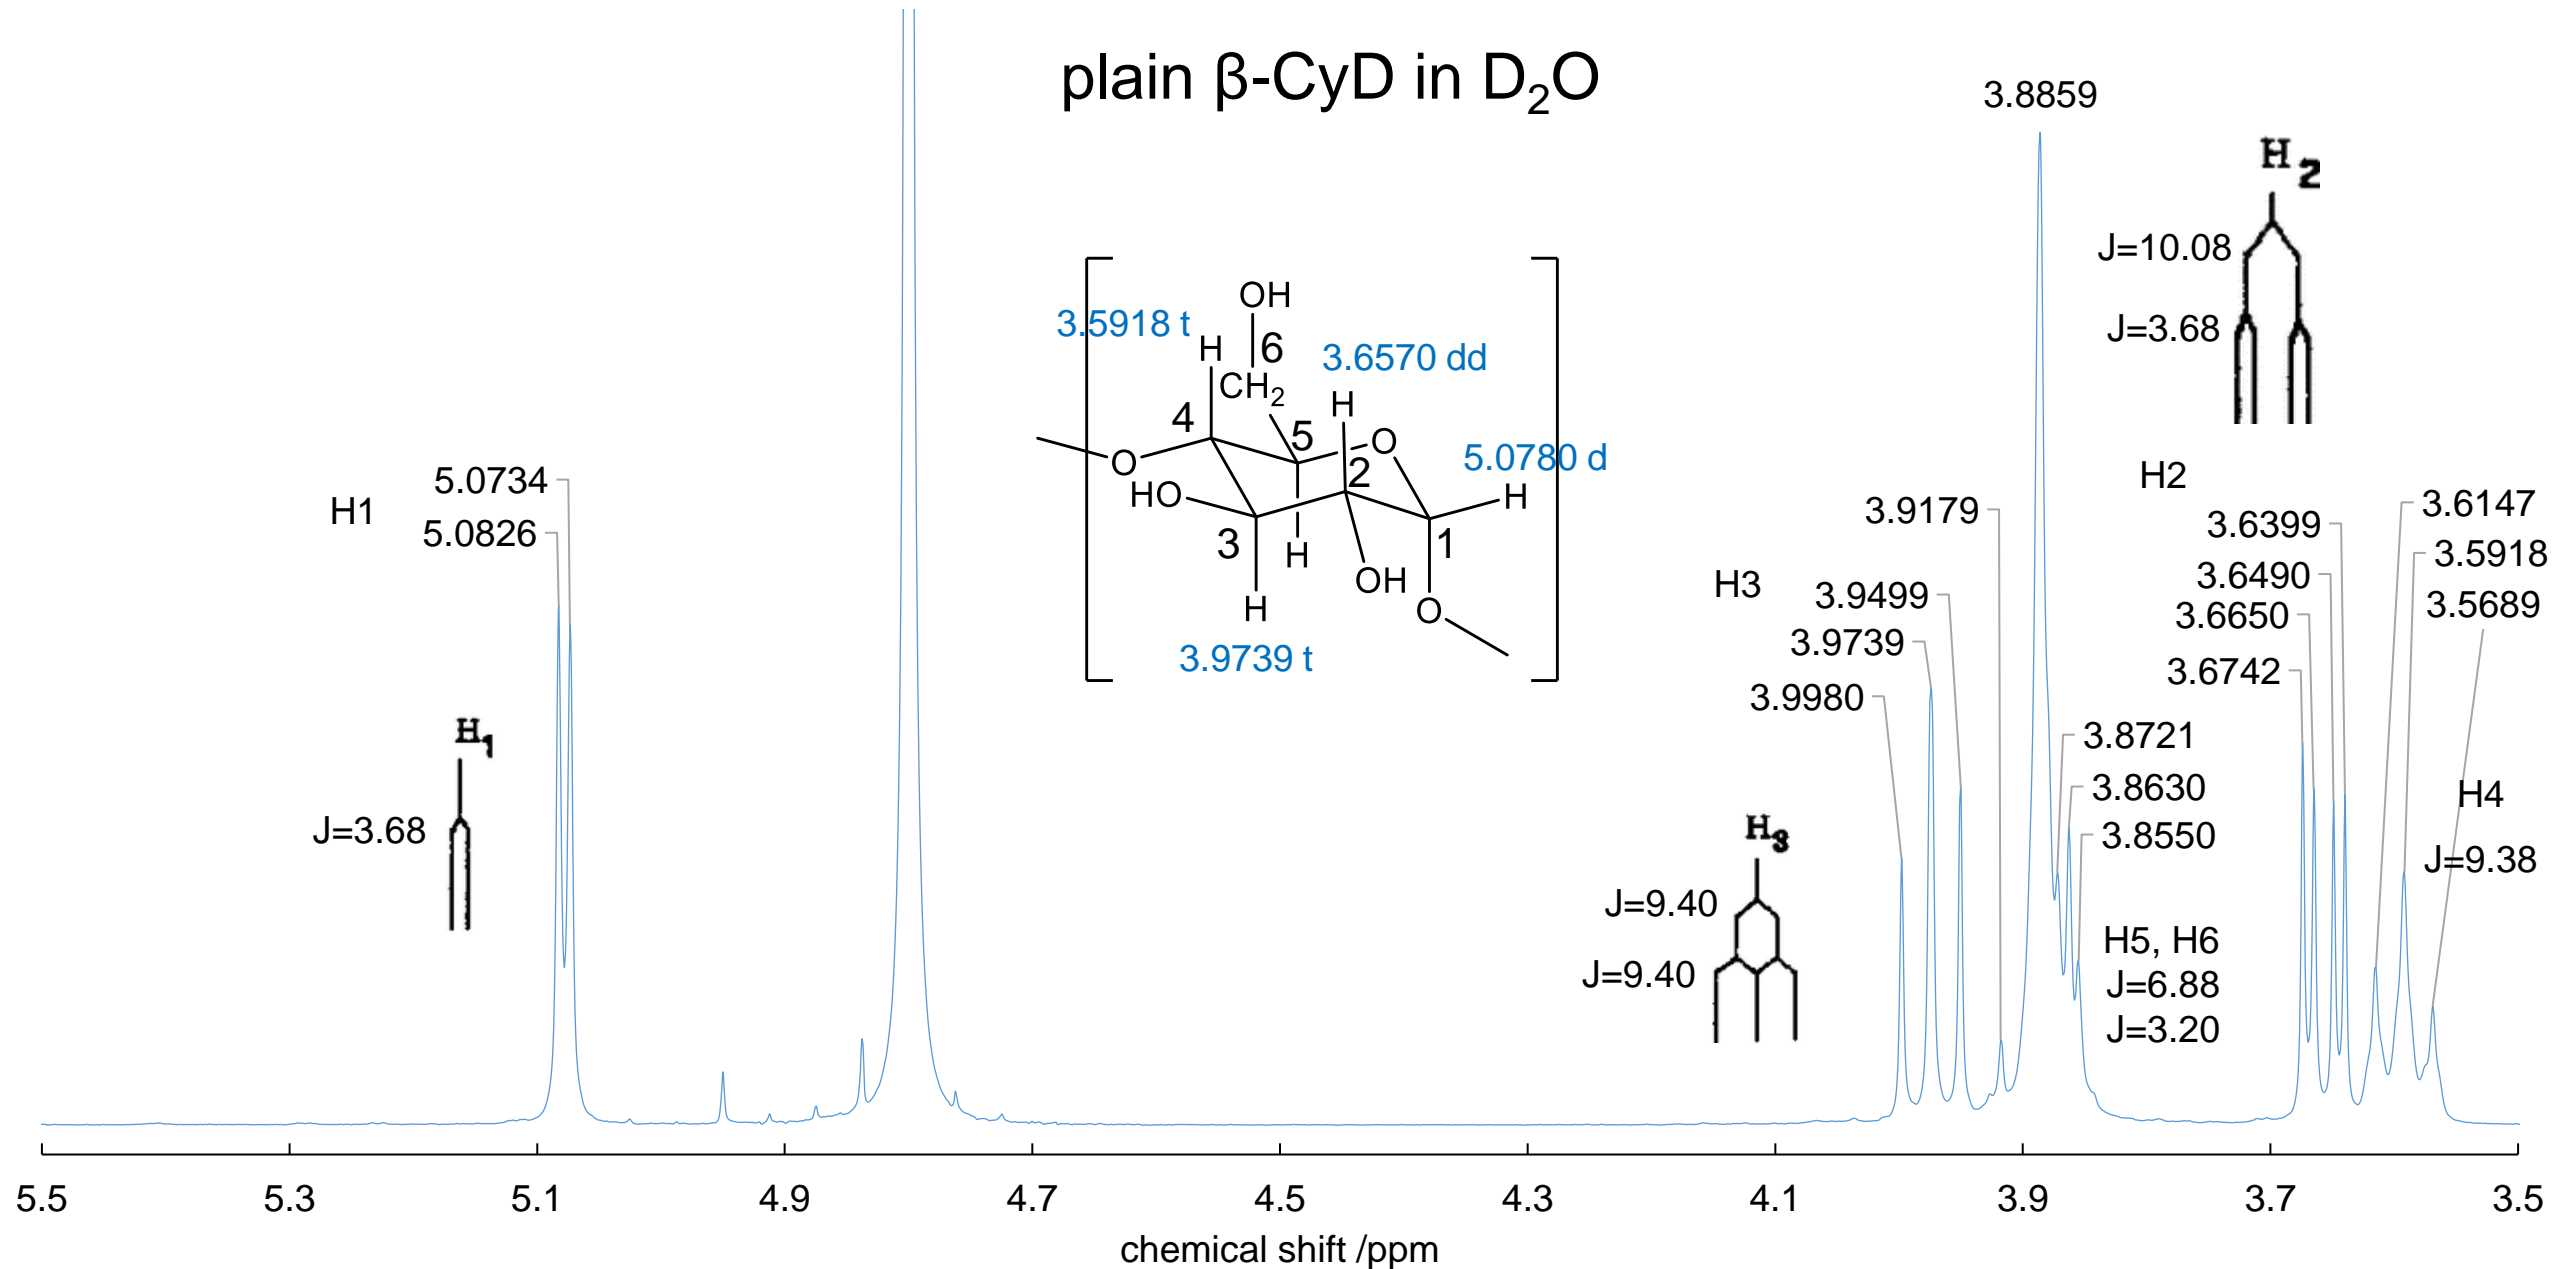

Figure S4(A) The 400 MHz <sup>1</sup>H-NMR spectrum of the plain  $\beta$ -CD in D<sub>2</sub>O (at 4.8000 ppm)

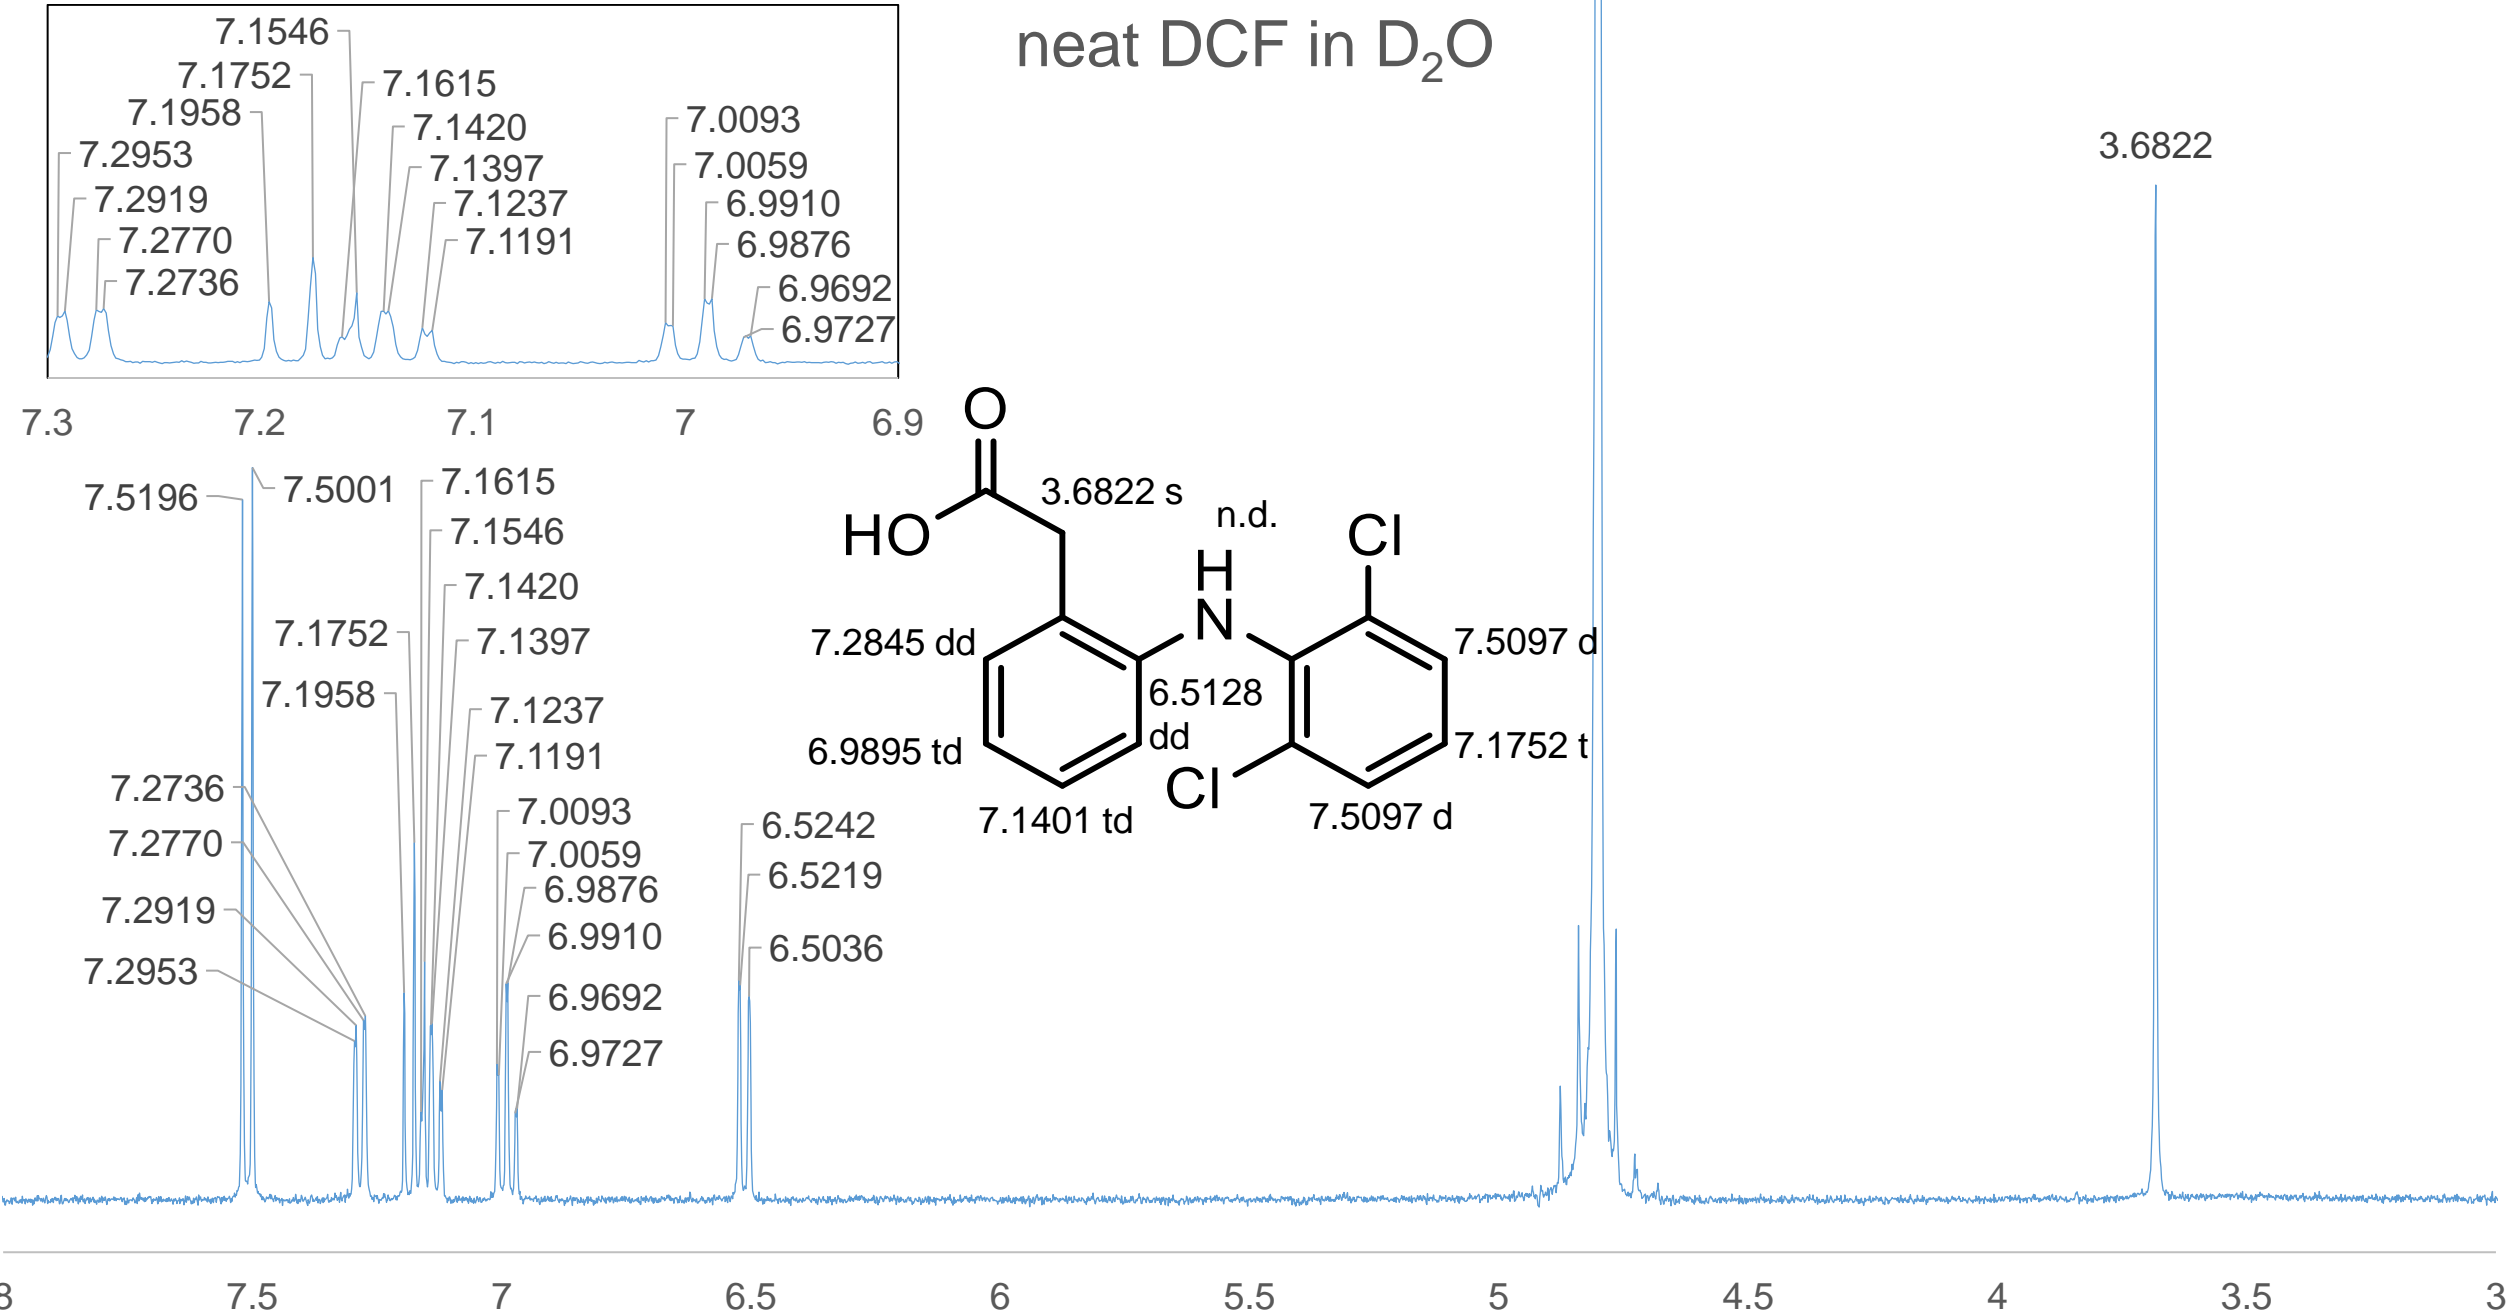

Figure S4(B) The 400 MHz <sup>1</sup>H-NMR spectrum of the neat DCF in D<sub>2</sub>O (at 4.8000 ppm)

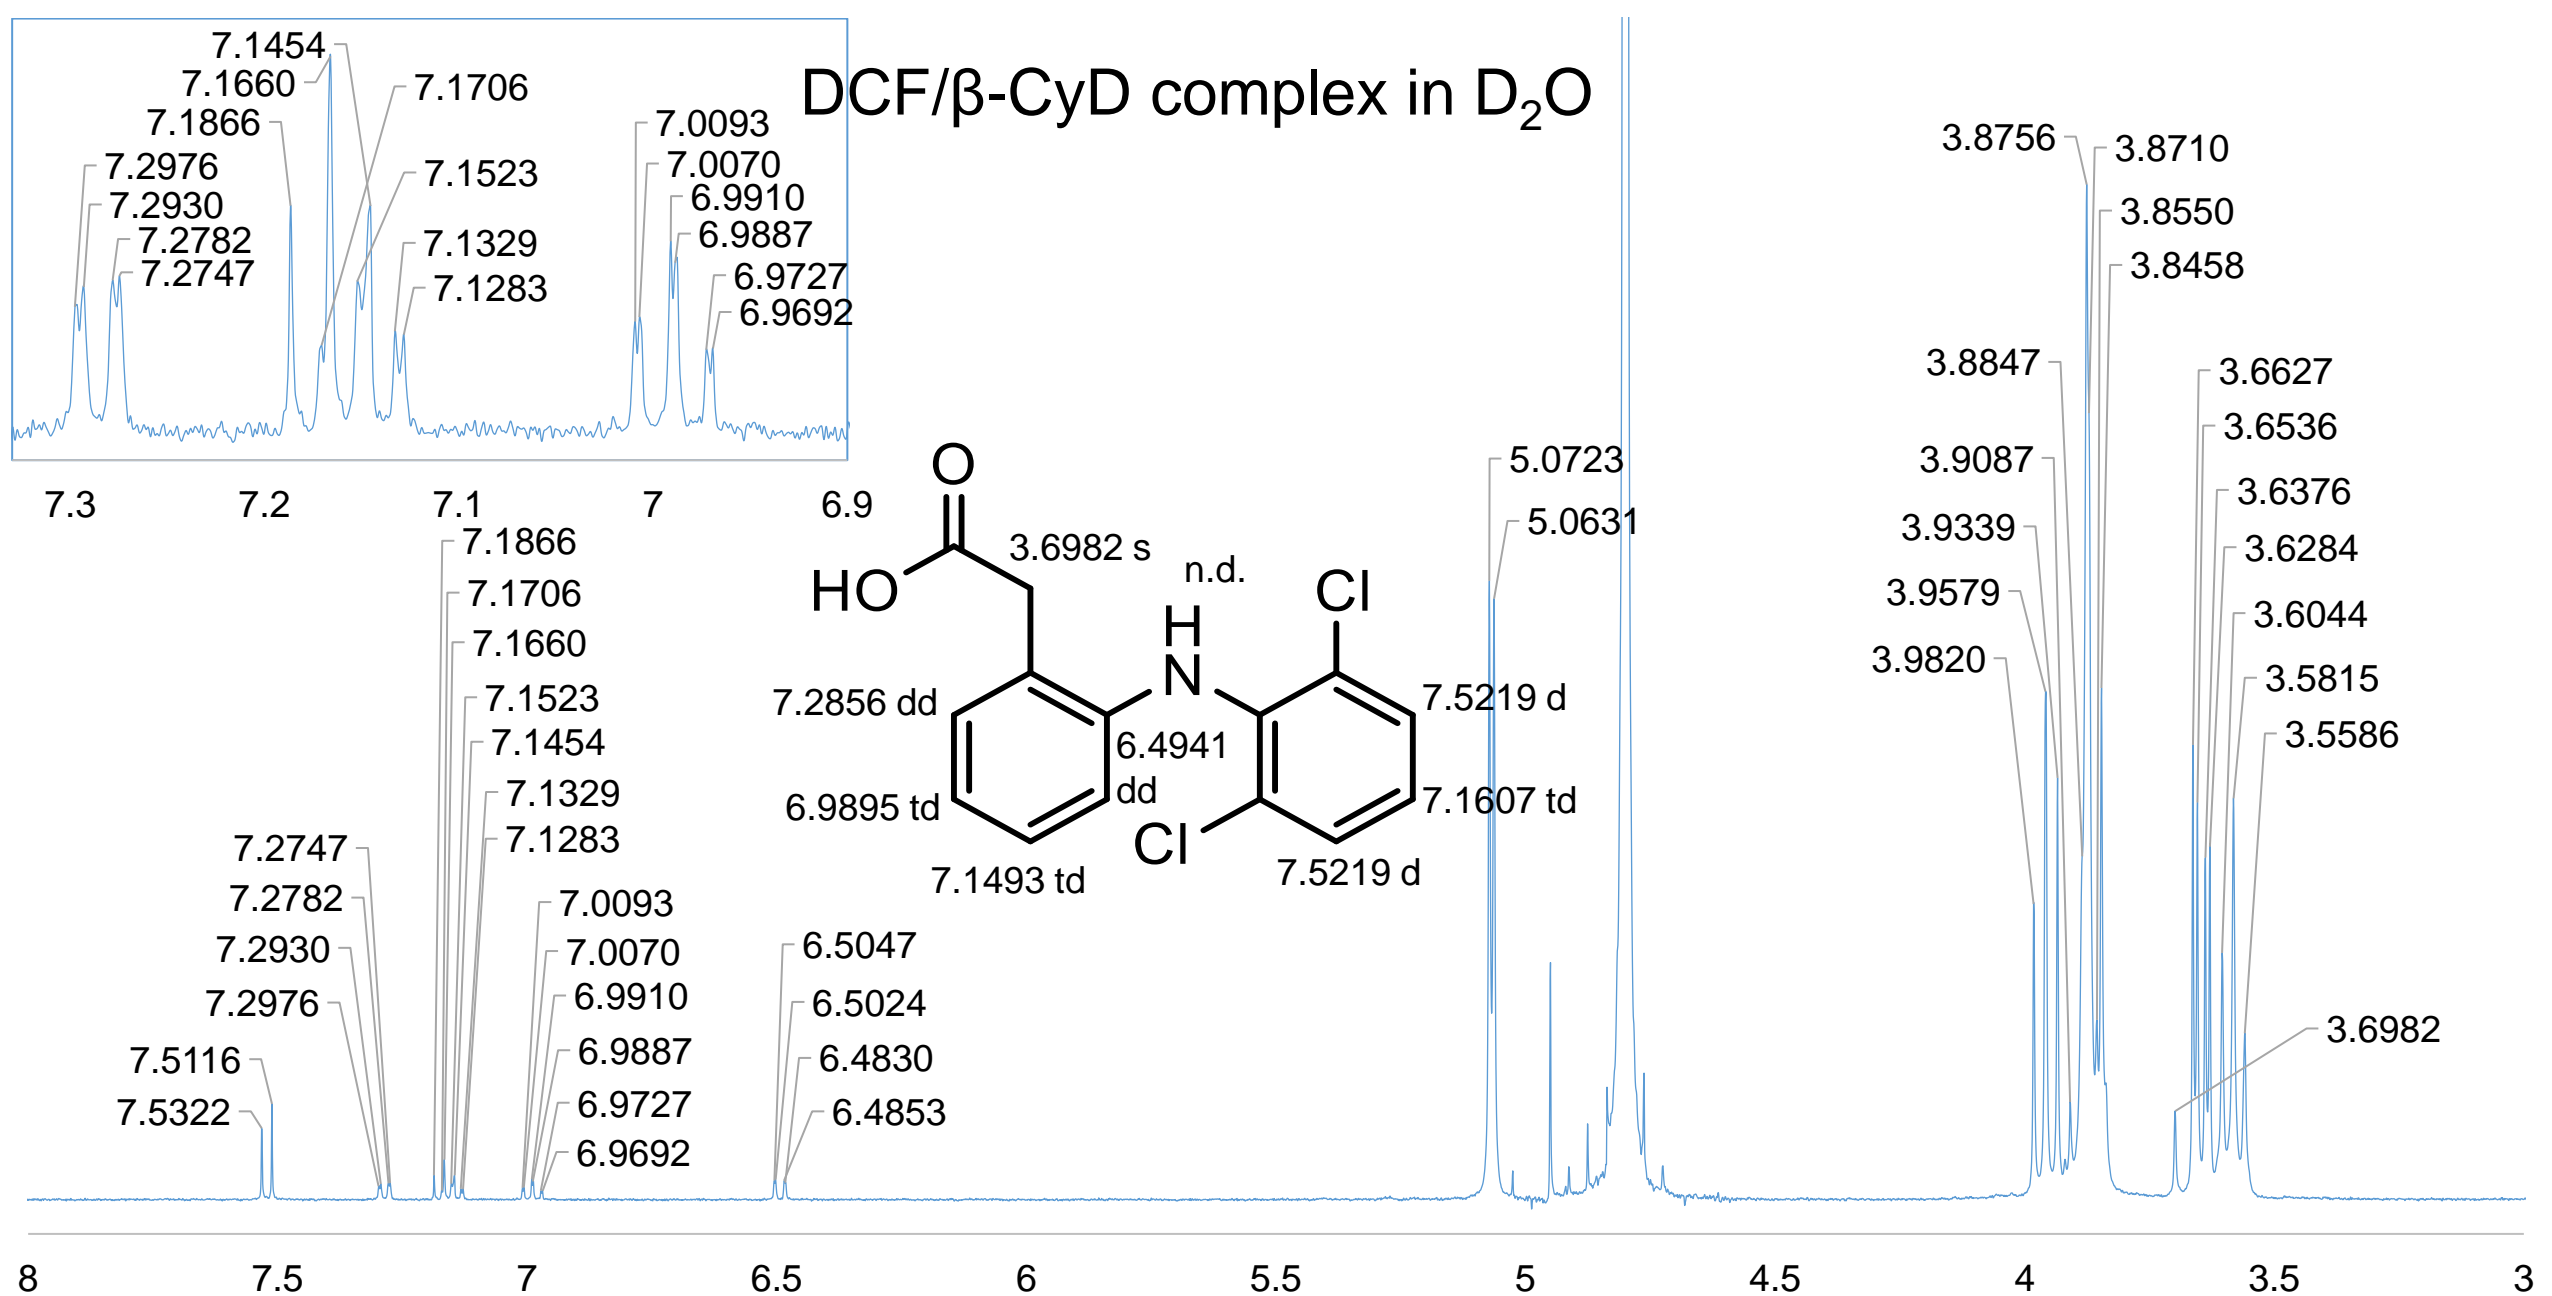

Figure S4(C) The 400 MHz <sup>1</sup>H-NMR spectrum of the DCF/ $\beta$ -CD complex in D<sub>2</sub>O (at 4.8000 ppm)<sup>15</sup>

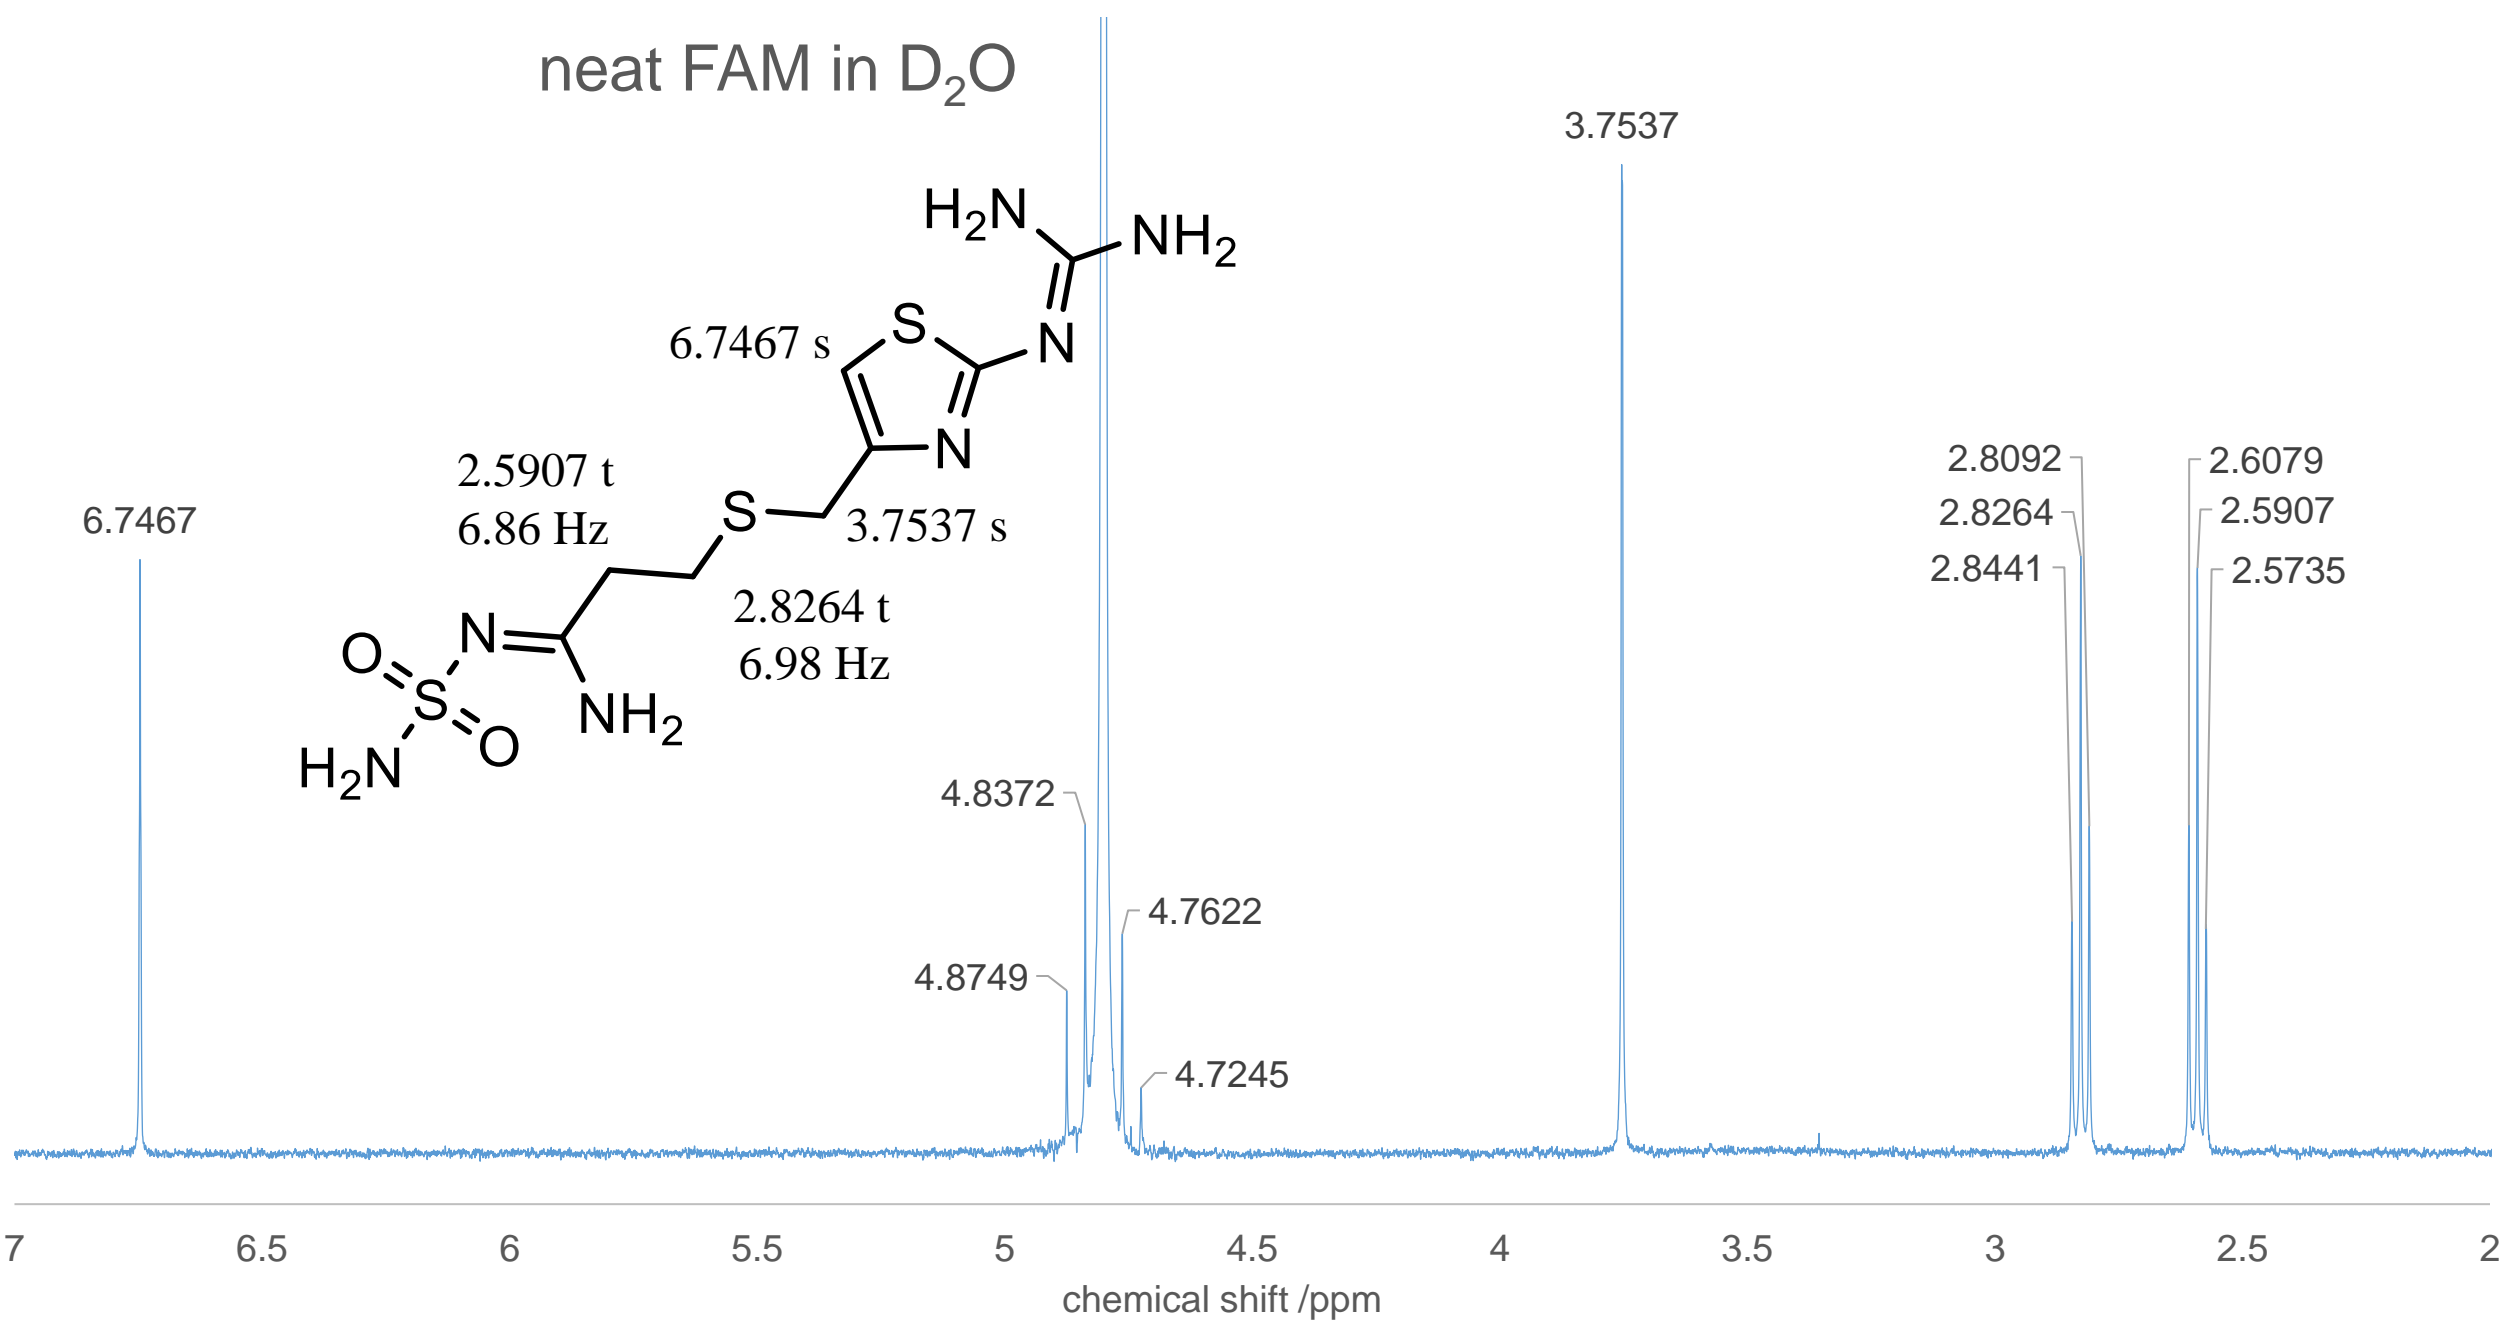

Figure S4(D) The 400 MHz <sup>1</sup>H-NMR spectrum of the neat FAM in D<sub>2</sub>O (at 4.8000 ppm)



# FAM/ $\beta$ -CyD complex in $D_2O$

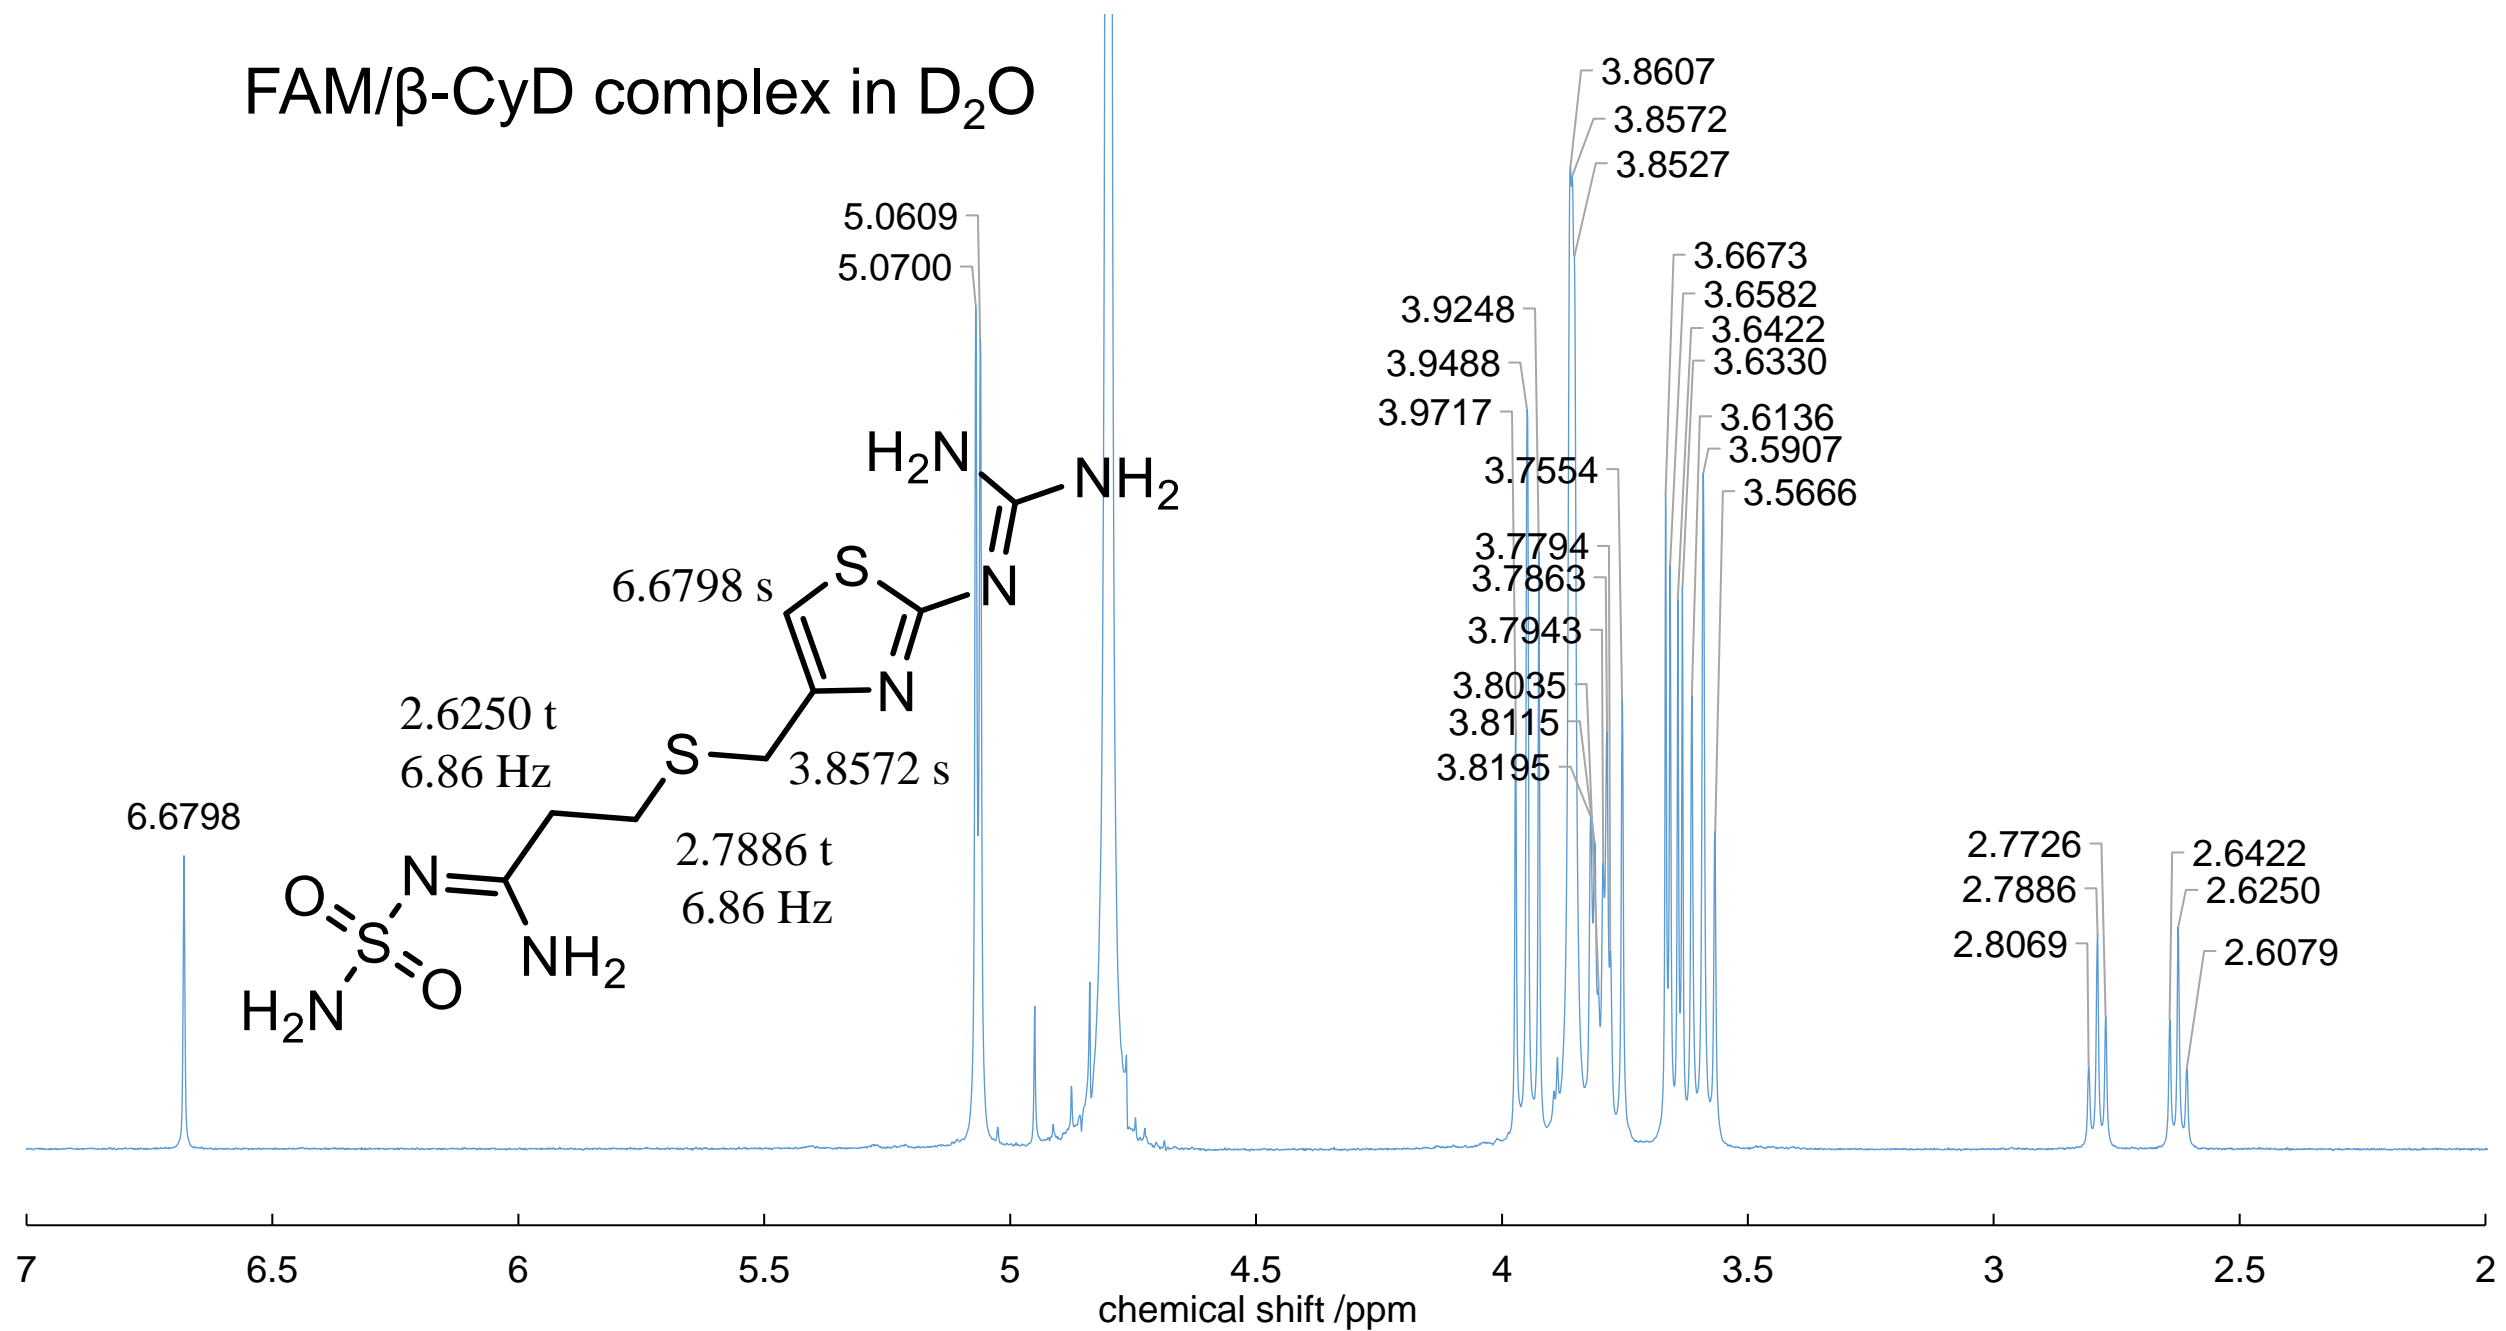

Figure S4(E) The 400 MHz  $^1H$ -NMR spectrum of the FAM/ $\beta$ -CD complex in  $D_2O$  (at 4.8000 ppm)<sup>17</sup>

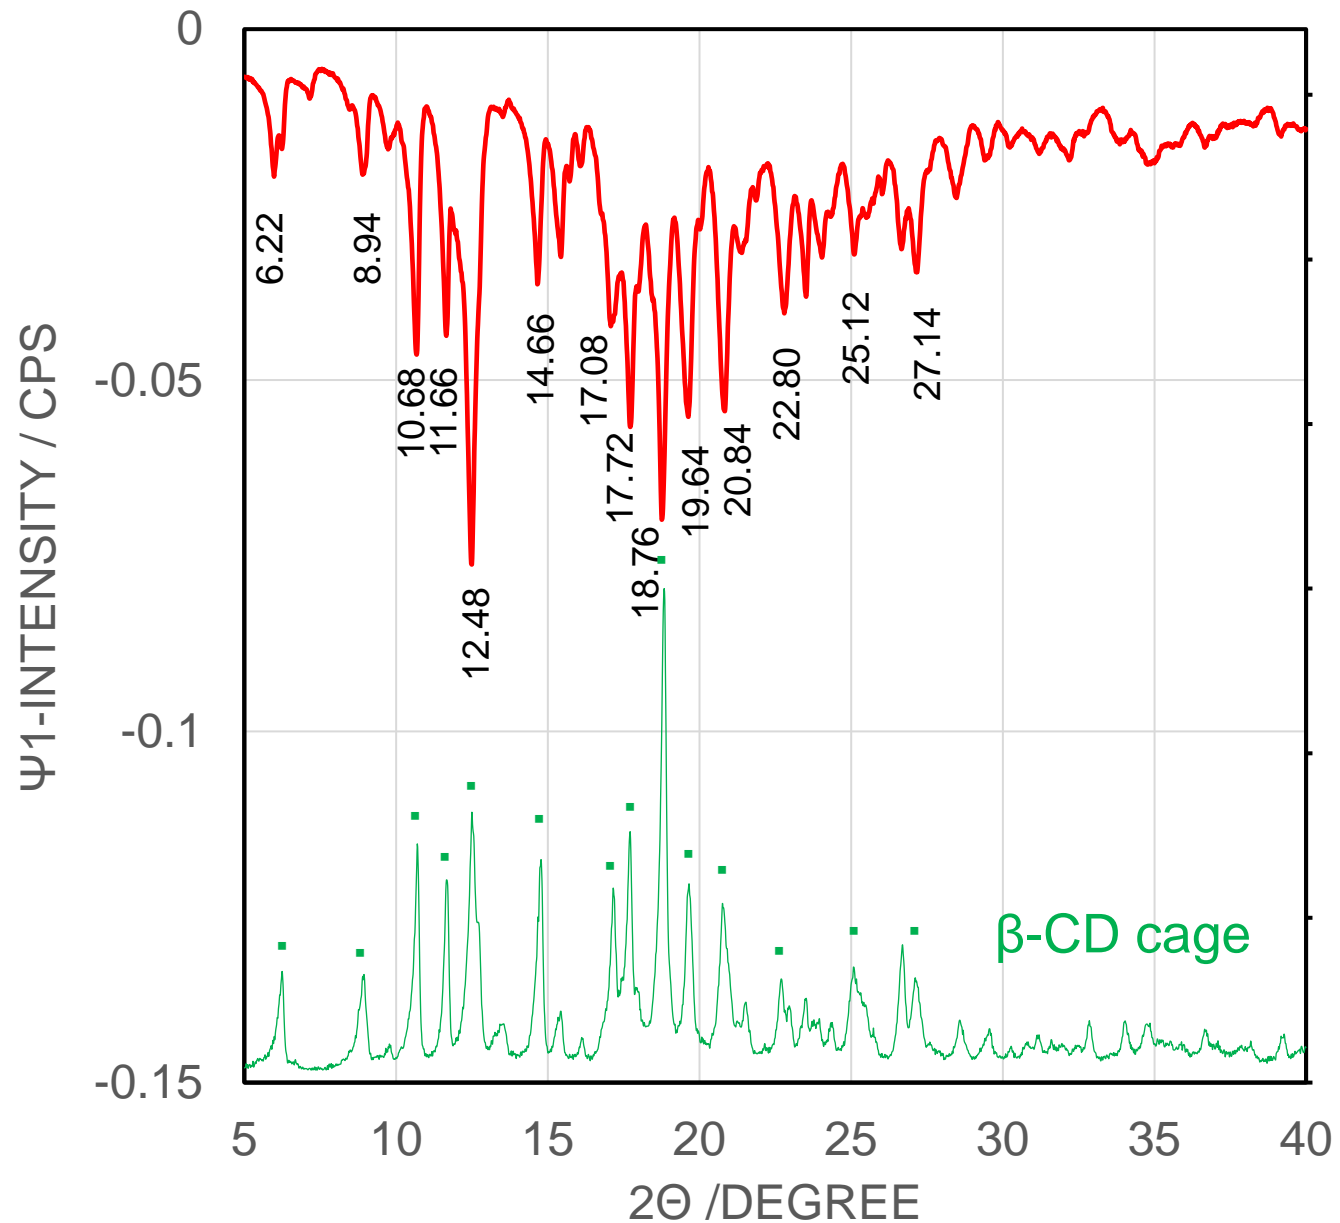

Figure S5(A) The 1-st singular vector (red) in the SVD for the diffractograms of API/ $\beta$ -CD mixtures, compared with the diffractogram of  $\beta$ -CD cage form (green)

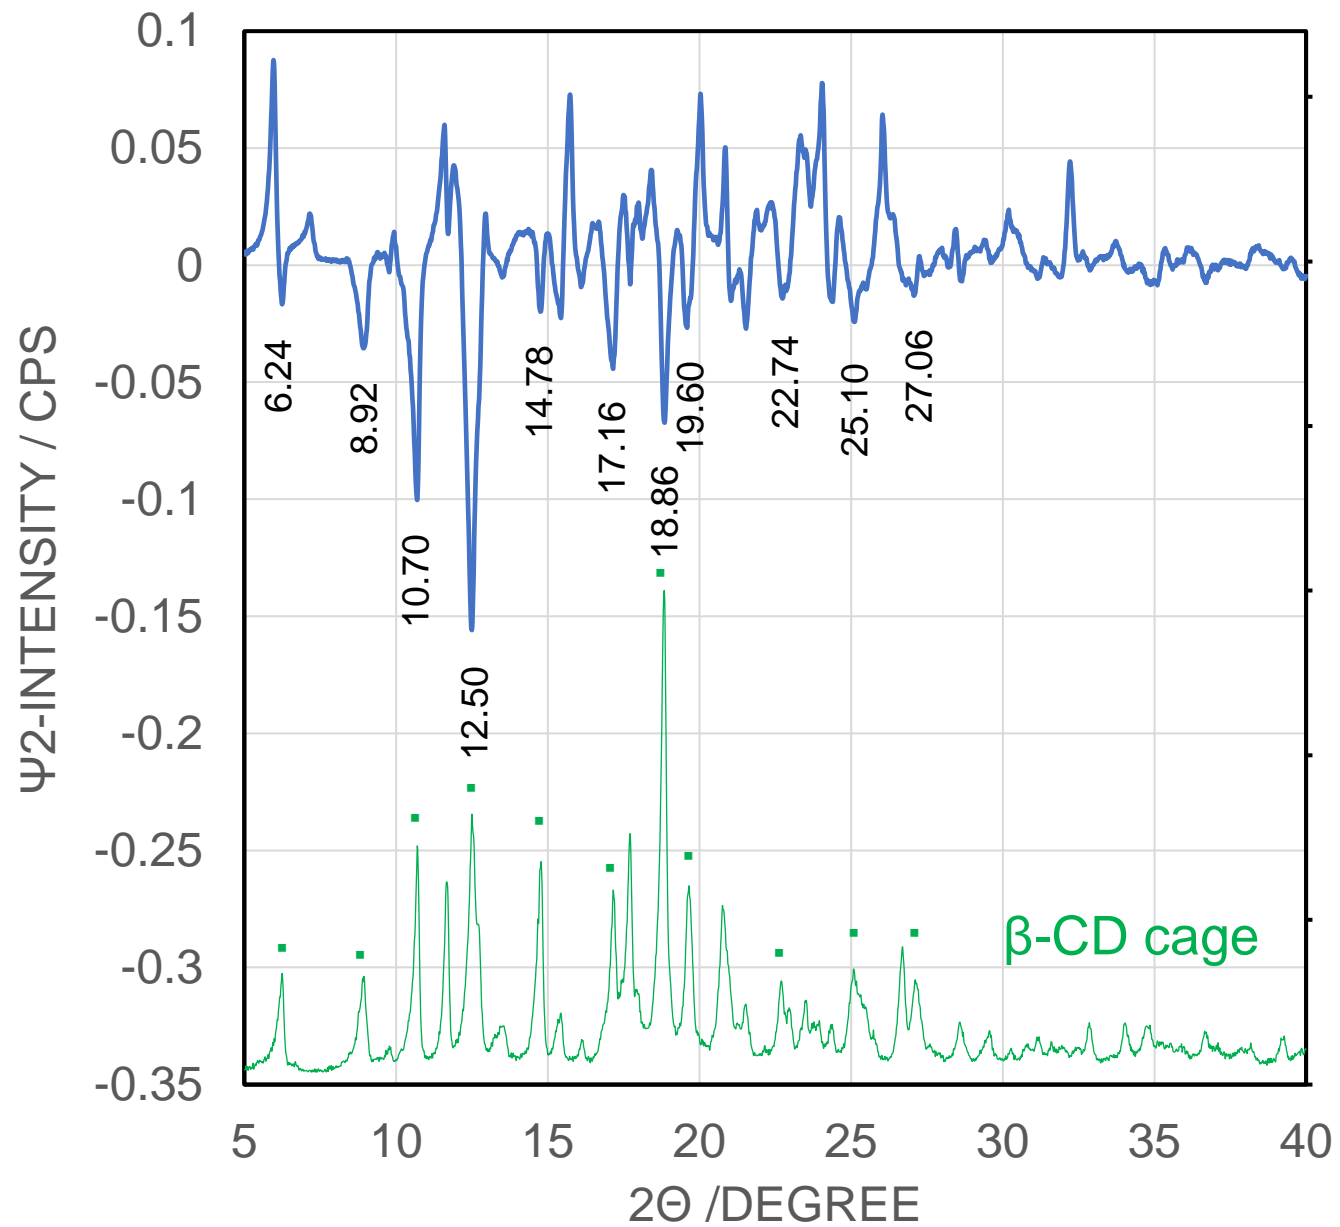

Figure S5(B) The 2<sup>nd</sup> singular vector (blue) compared with the diffractogram of  $\beta$ -CD cage form (green)

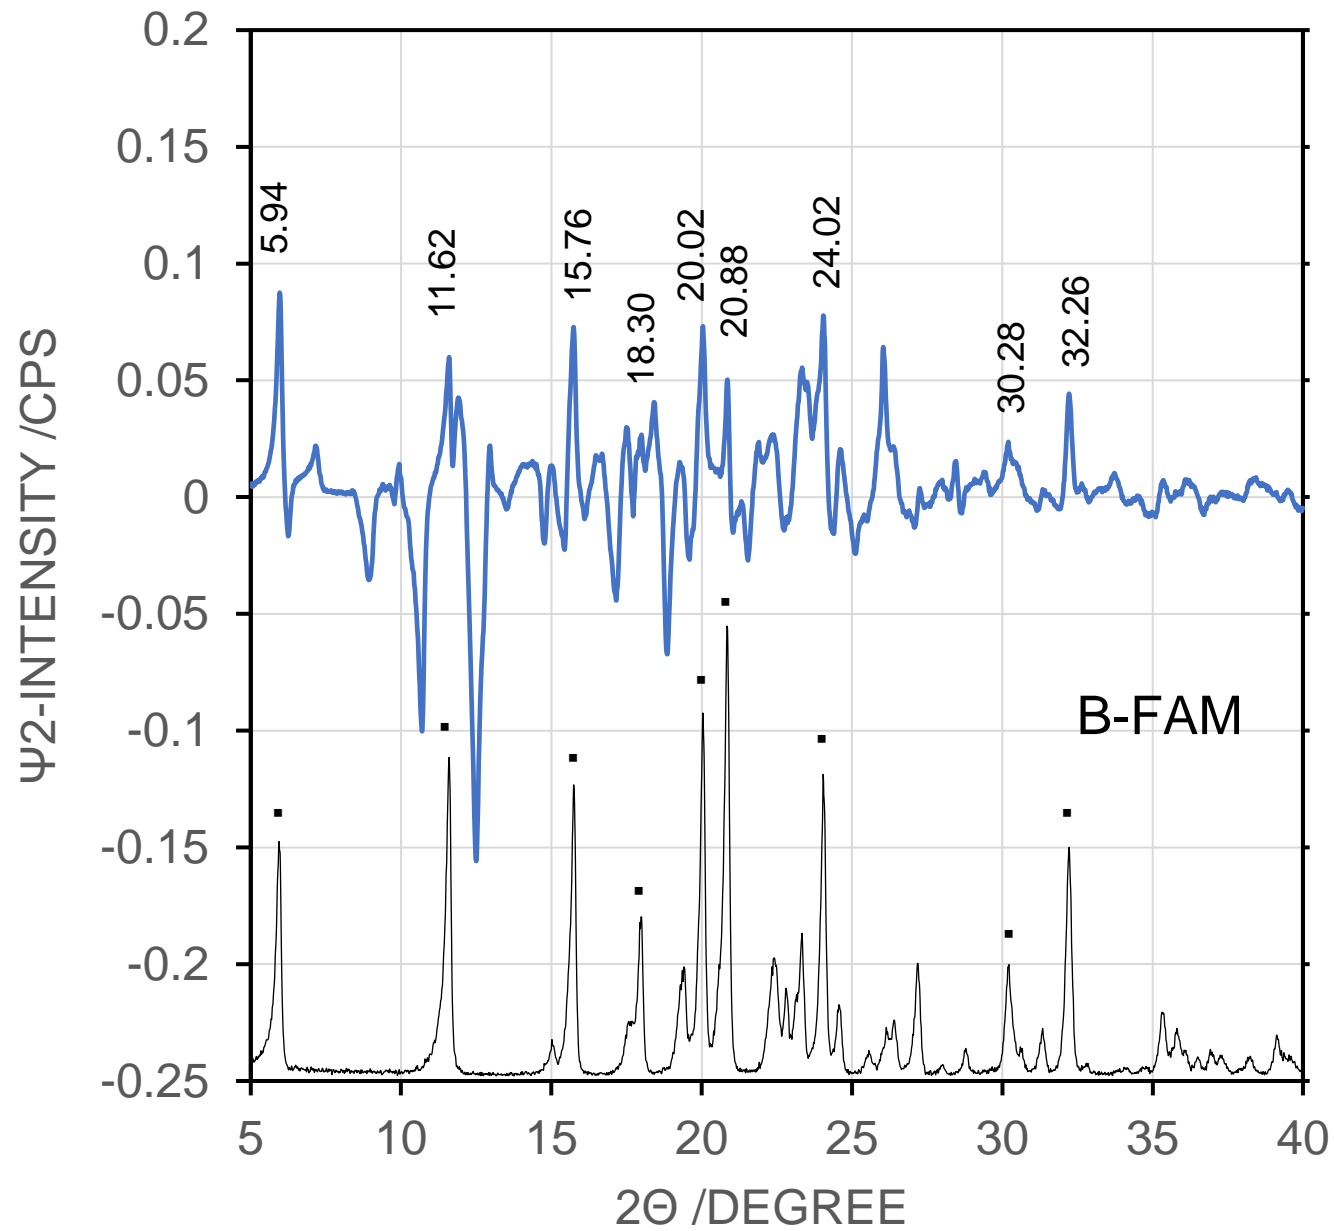

Figure S5(C) The 2-nd singular vector (blue) compared with the diffractogram of FAM B-form (black) 20

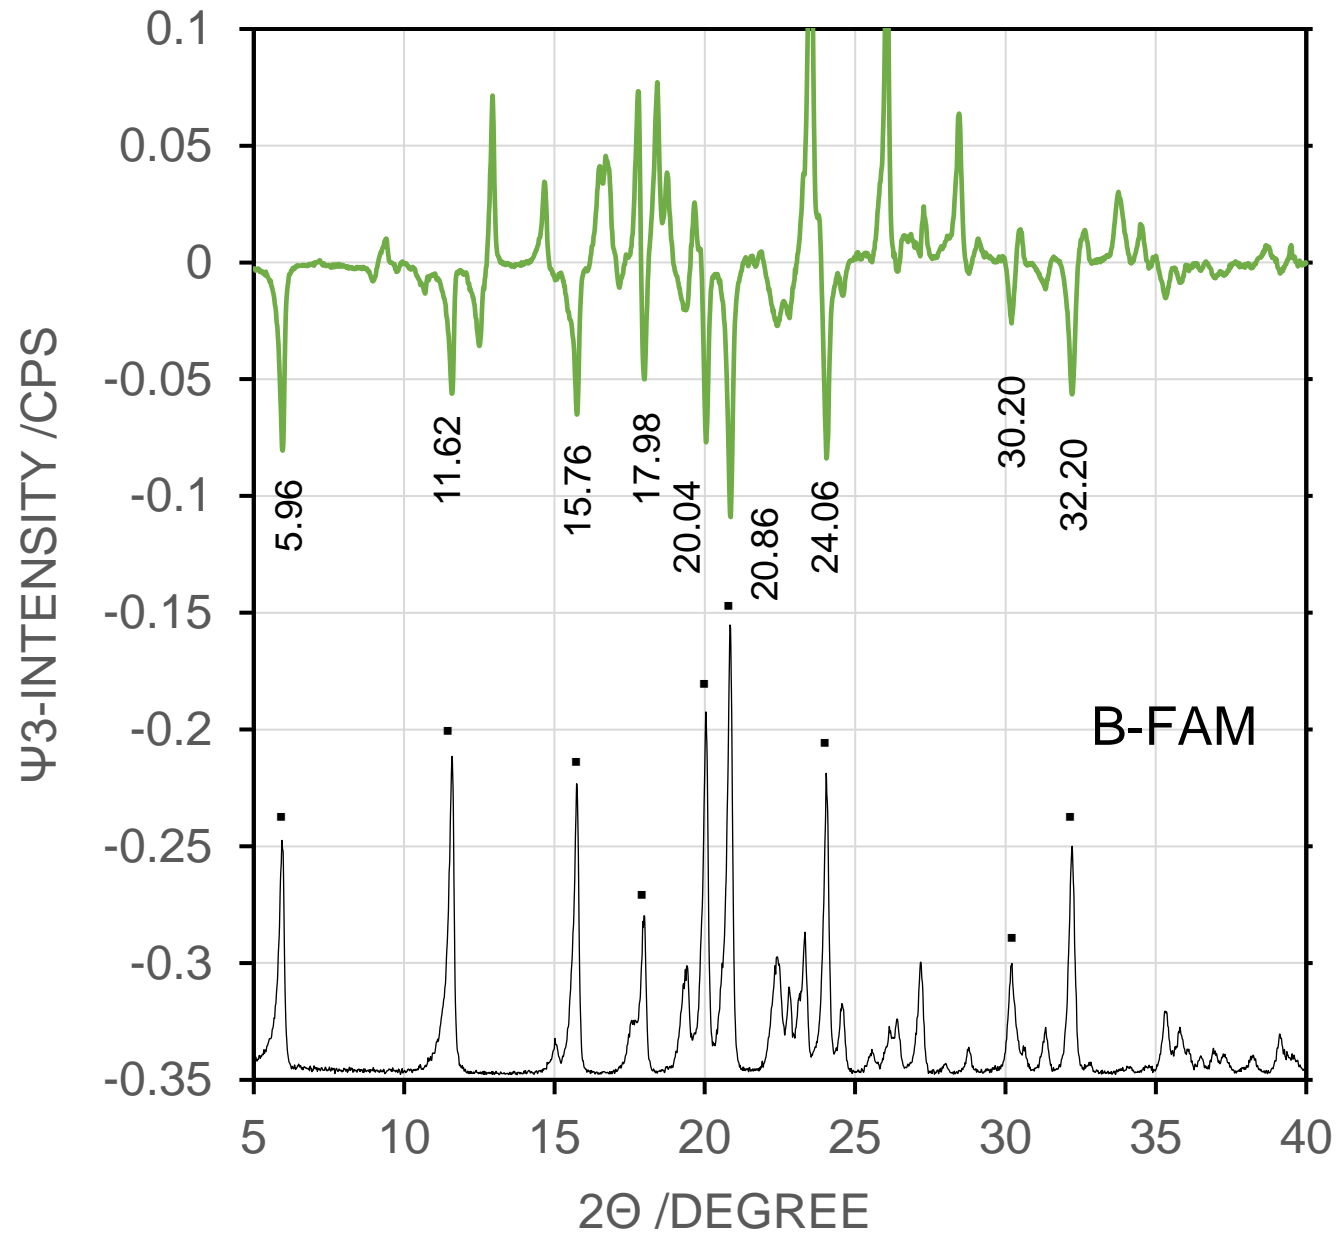

Figure S5(D) The 3-rd singular vector (green) compared with the diffractogram of FAM B-form (black) 21

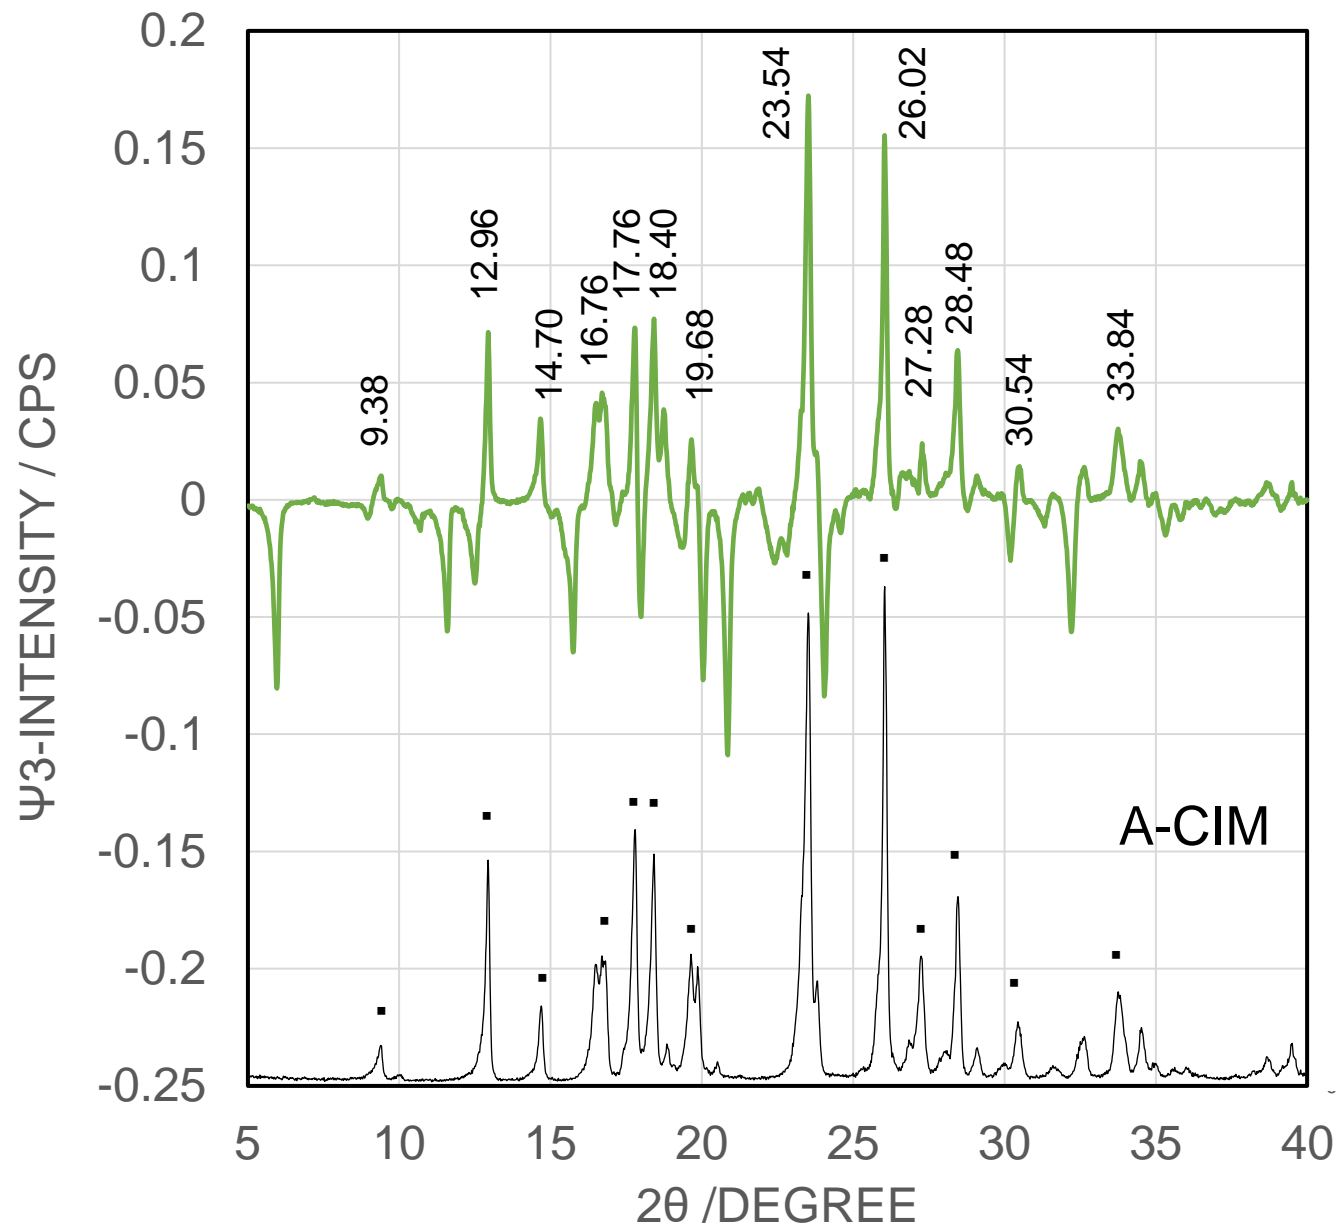

Figure S5(E) The 3-rd singular vector (green) compared with the diffractogram of CIM A-form (black) 22

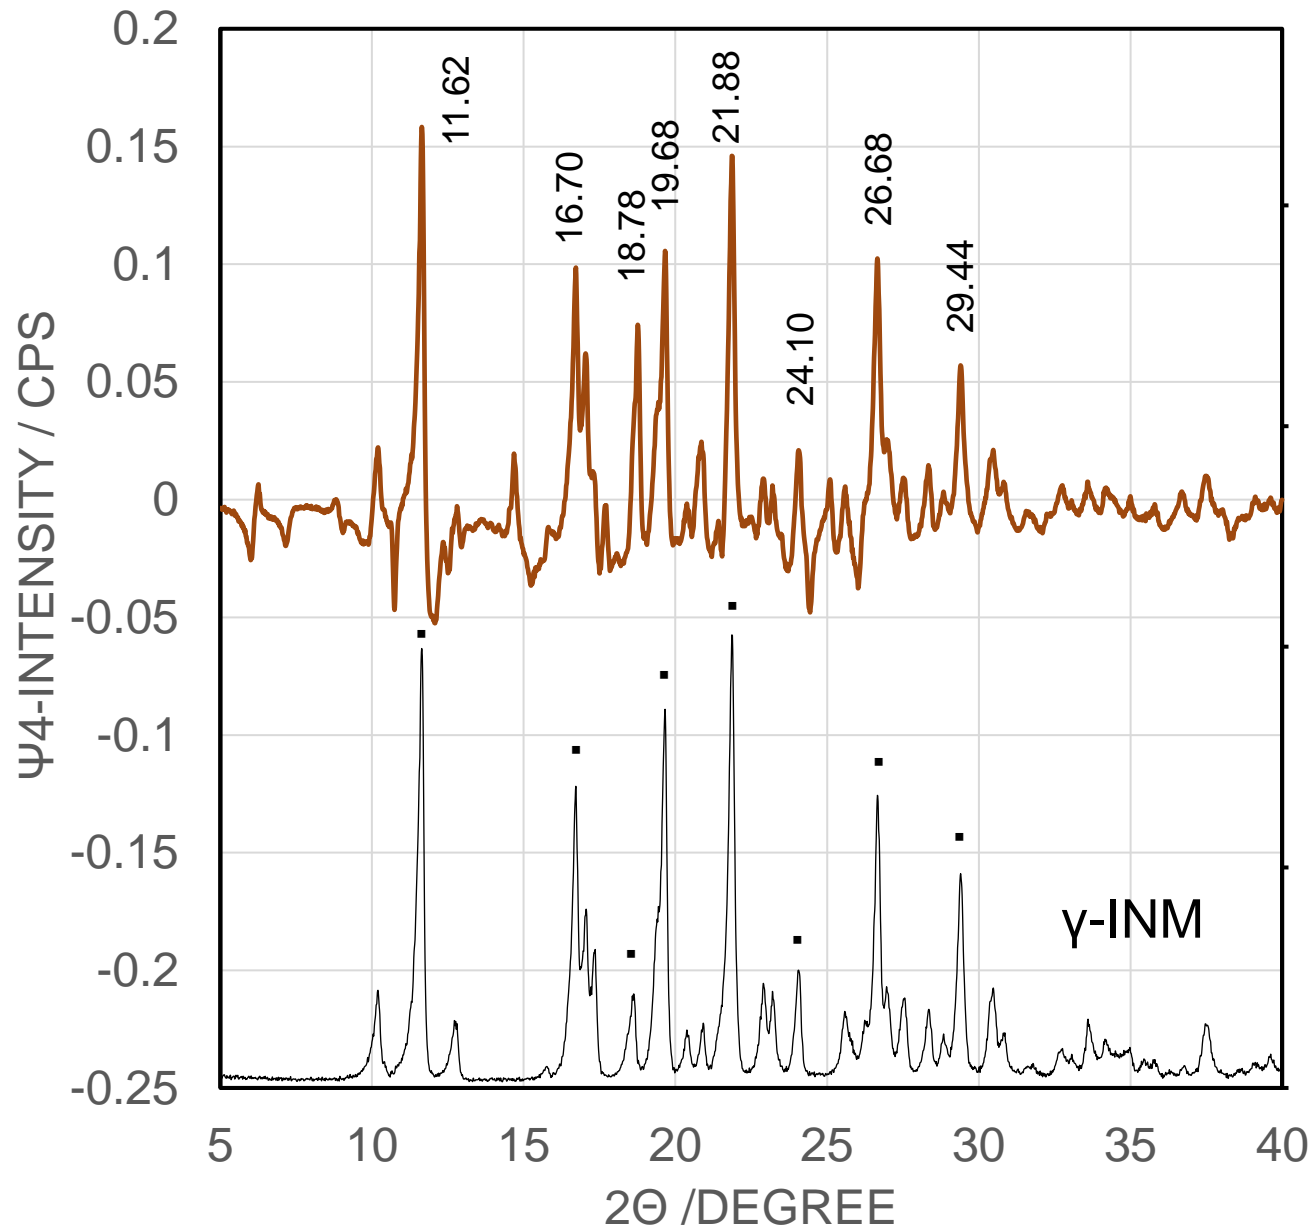

Figure S5(F) The 4-th singular vector (burgundy) compared with the diffractogram of INM  $\gamma$ -form (black) 23

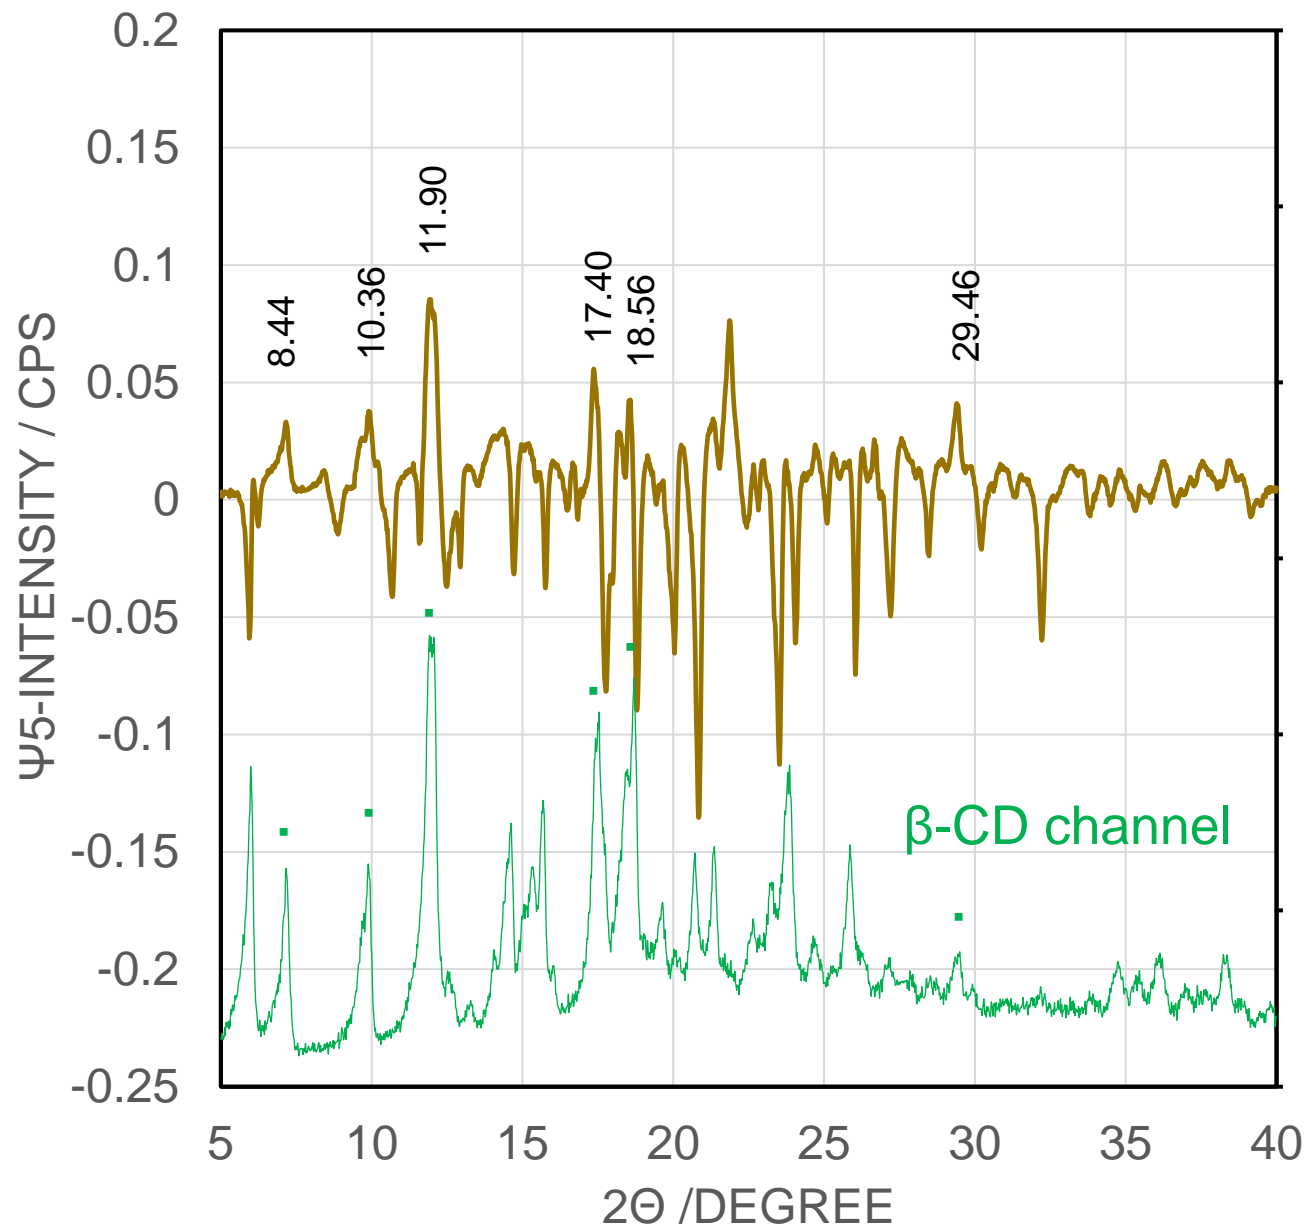

Figure S5(G) The 5-th singular vector (amber) compared with the pattern of  $\beta$ -CD channel-form (green) 24



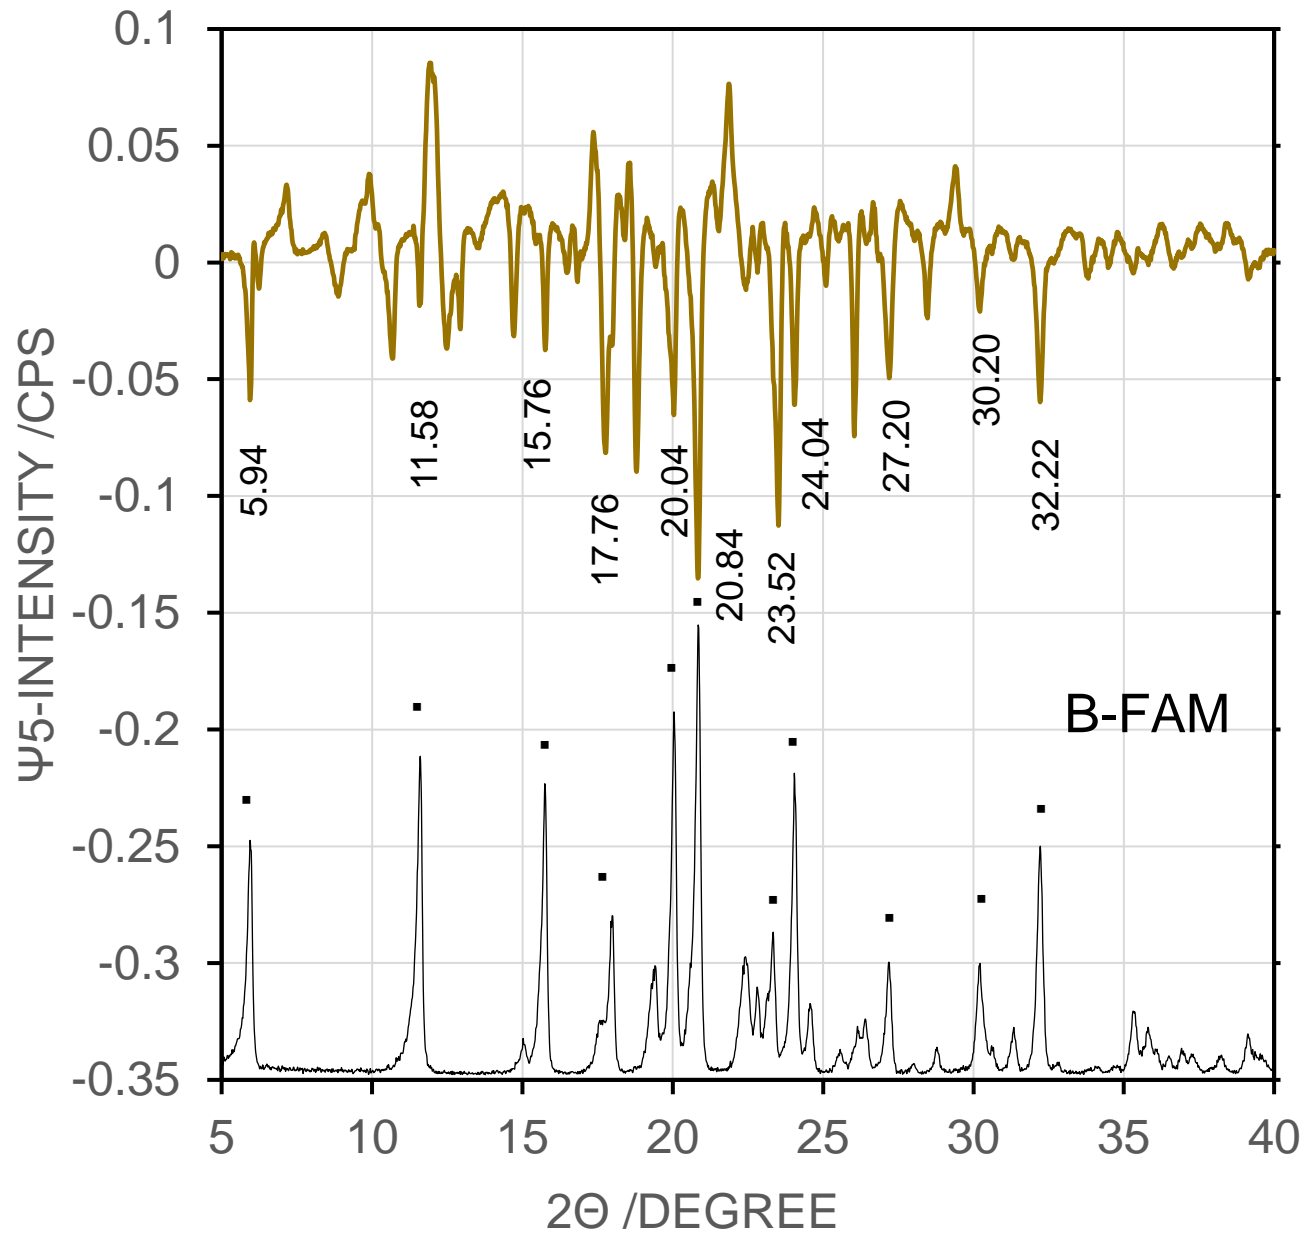

Figure S5(H) The 5-th singular vector (amber) compared with the diffractogram of INM  $\gamma$ -form (black) 25

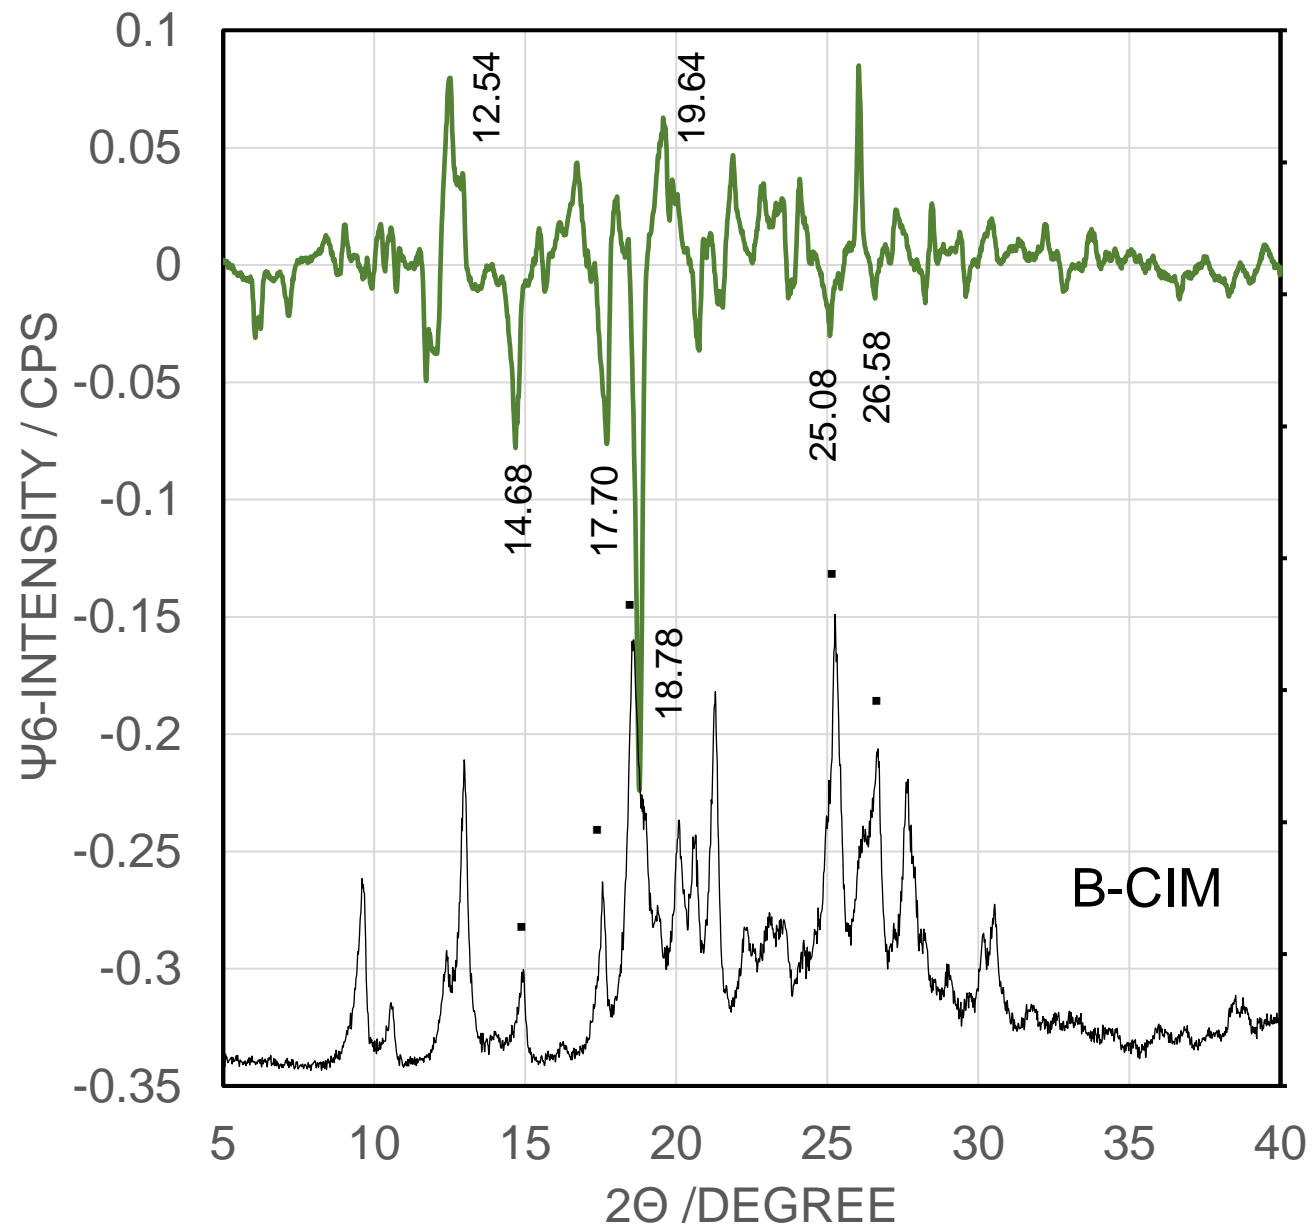

Figure S5(I) The 6-th singular vector (dark green) compared with the diffractogram of CIM B-form (black)

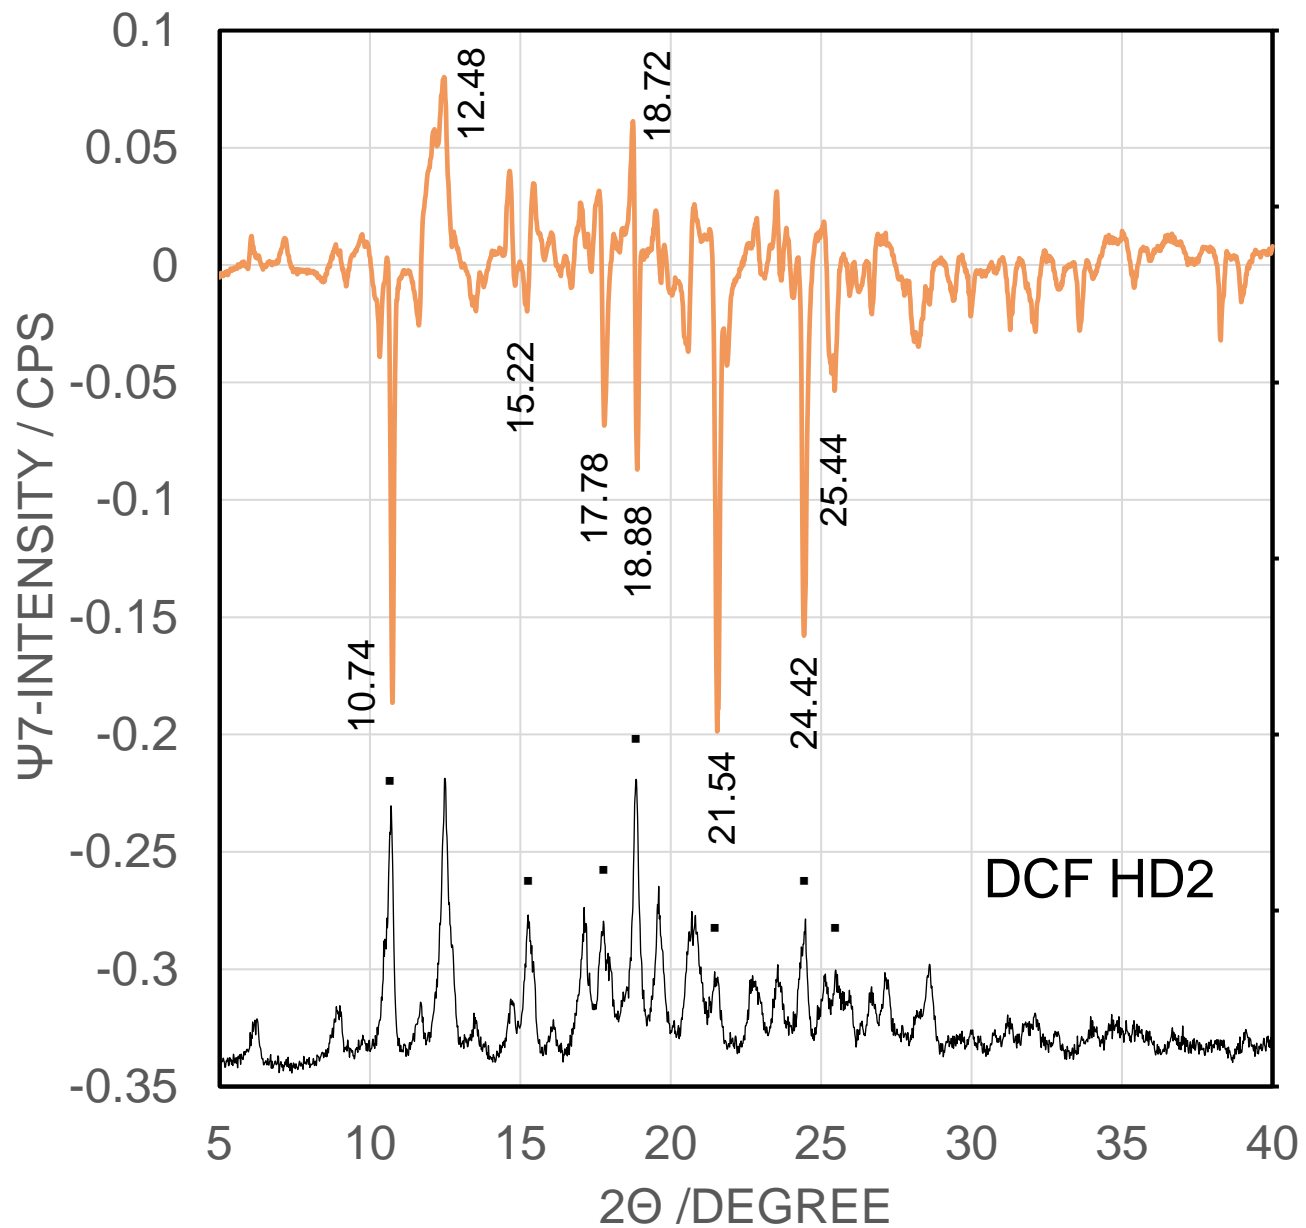

Figure S5(J) The 7-th singular vector (coral) compared with the diffractogram of DCF HD2-form (black)<sup>27</sup>

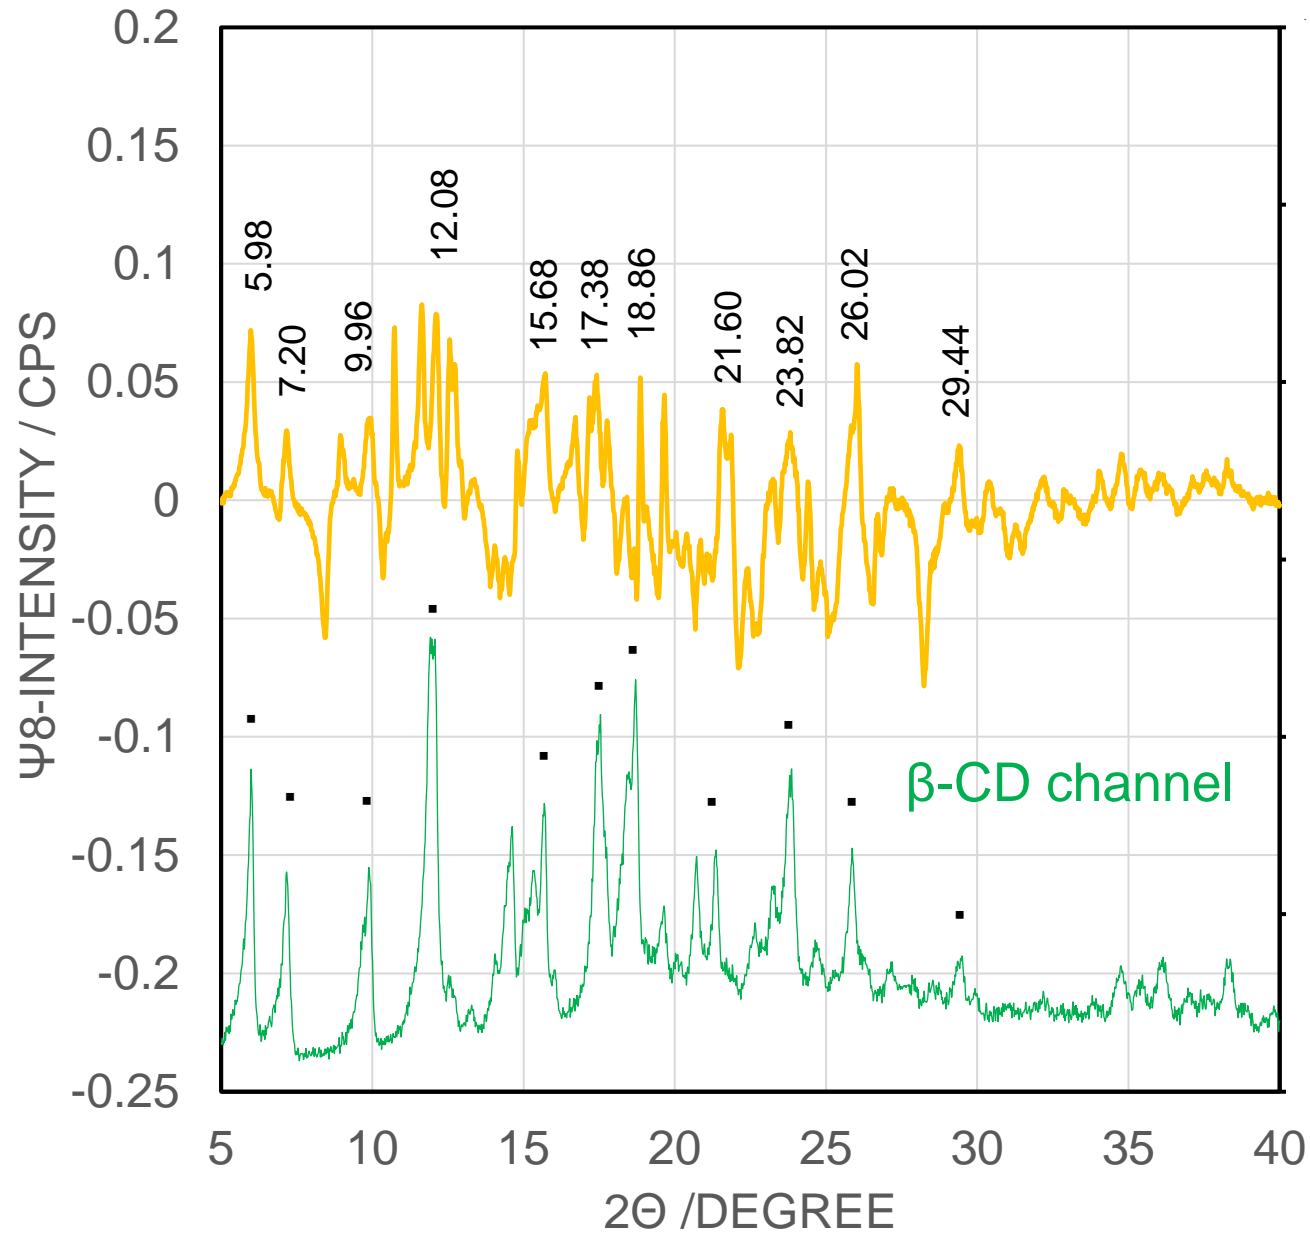

Figure S5(K) The 8-th singular vector (mustard) compared with the pattern of  $\beta$ -CD channel-form (green)

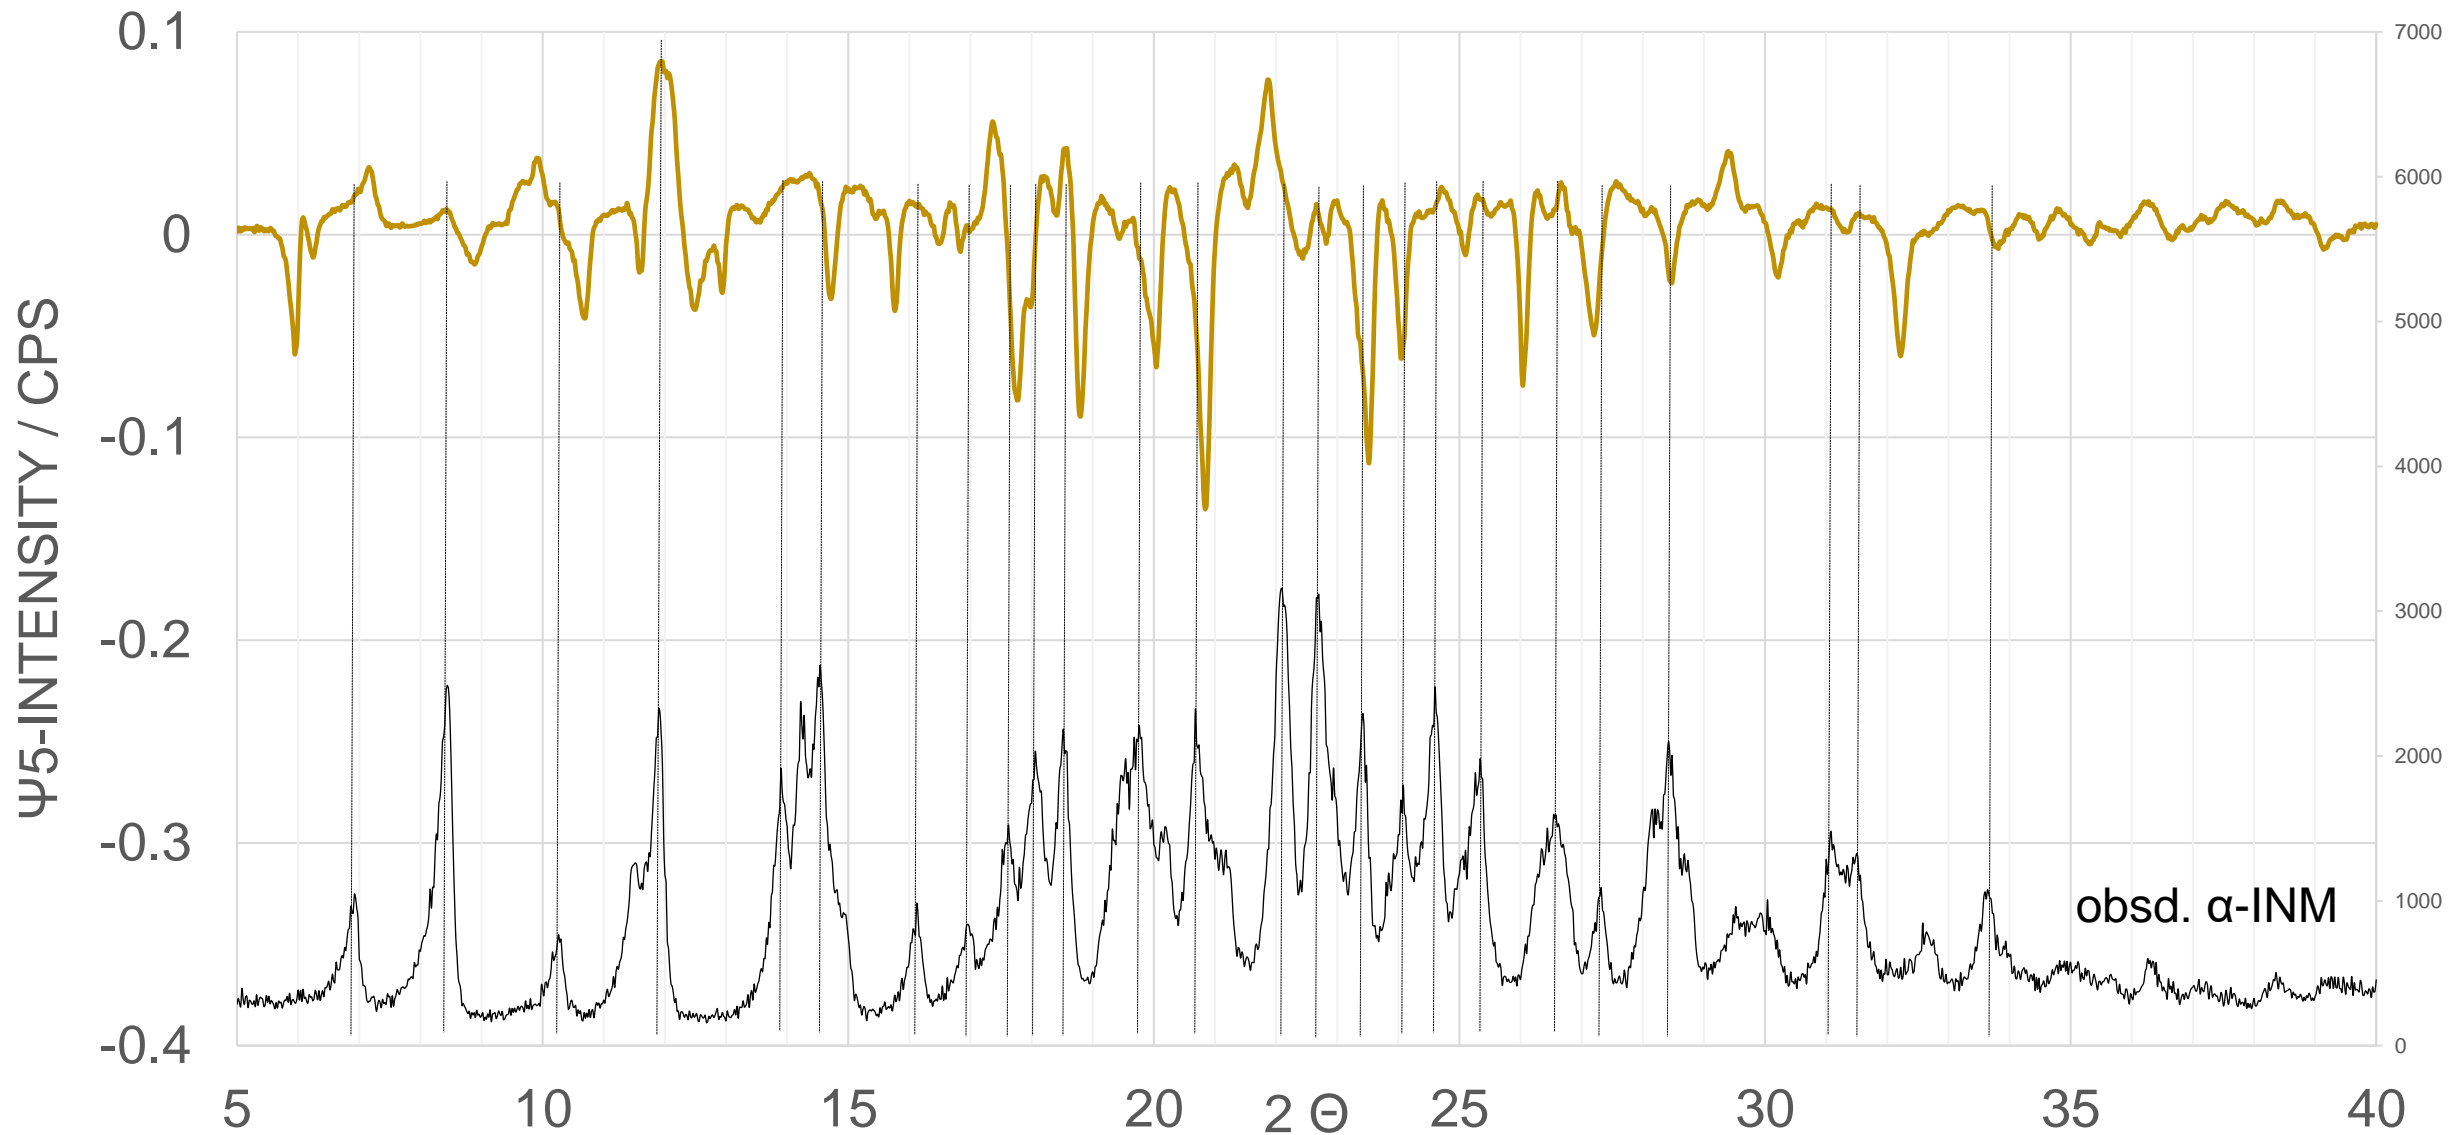

Figure S6. The 5-th basis function compared to the observed diffractogram of the INM  $\alpha$ -form. In the  $\psi_5$  (and other basis functions), neither peaks nor shoulders were almost found corresponding to those in the diffractogram of INM  $\alpha$ -form.

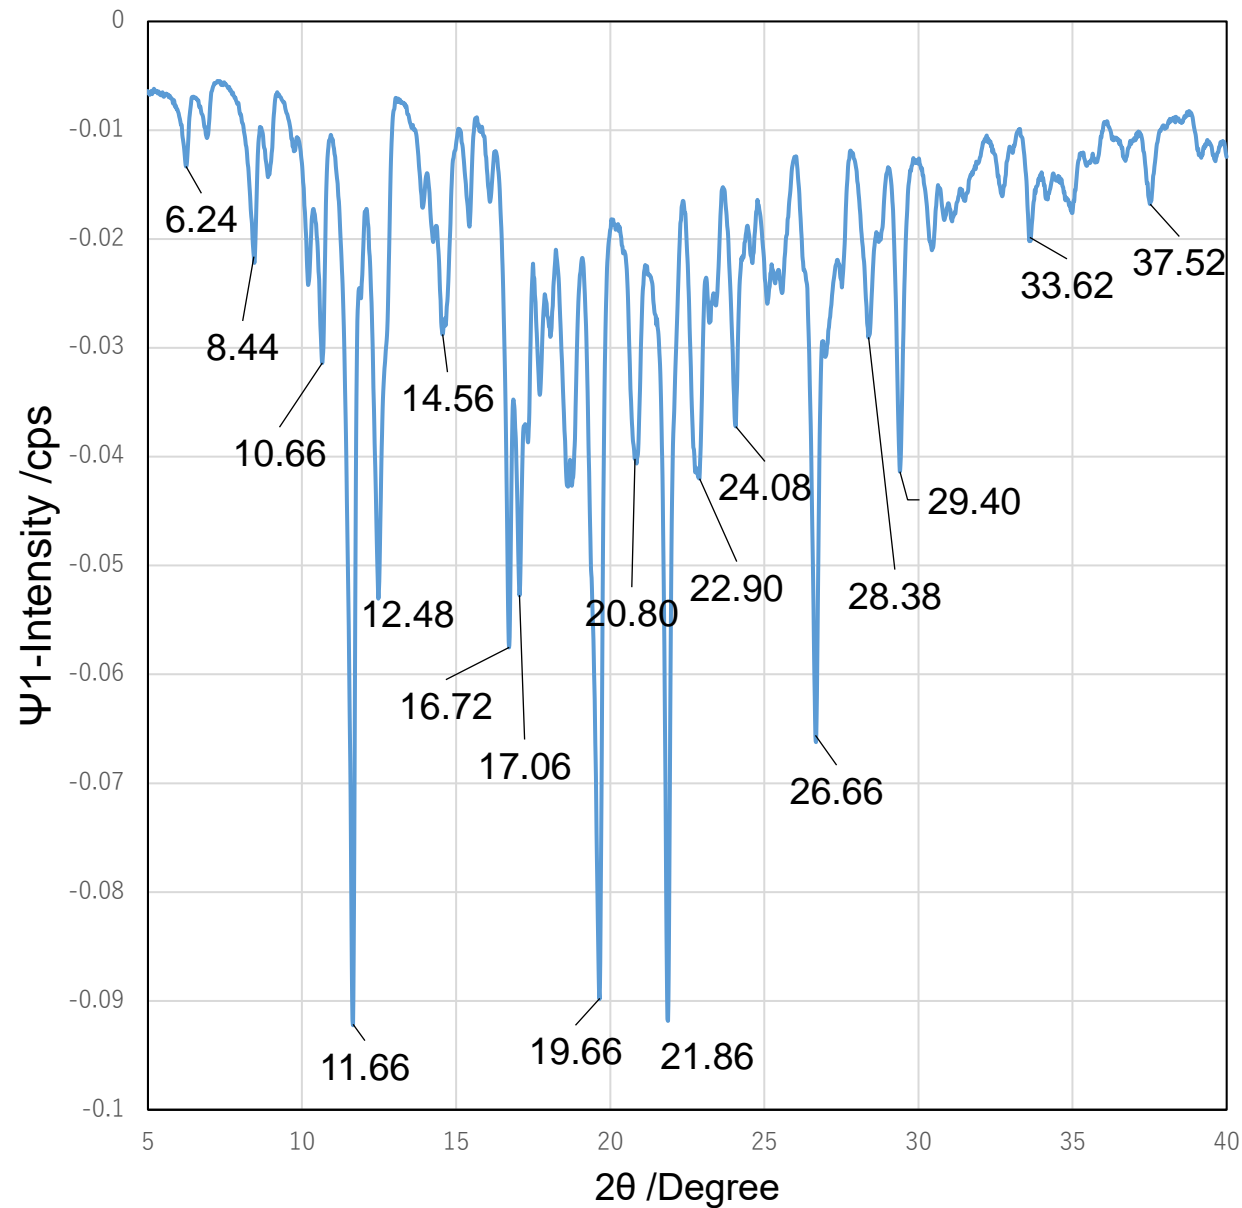

Figure S7(A) The 1-st singular vector (blue) in the SCD for the diffractograms of the INM/ $\beta$ -CD mixtures and the mixtures of the neat INM ( $\gamma$ -form) and its recrystallized  $\alpha$ -form crystal at various molar ratios.

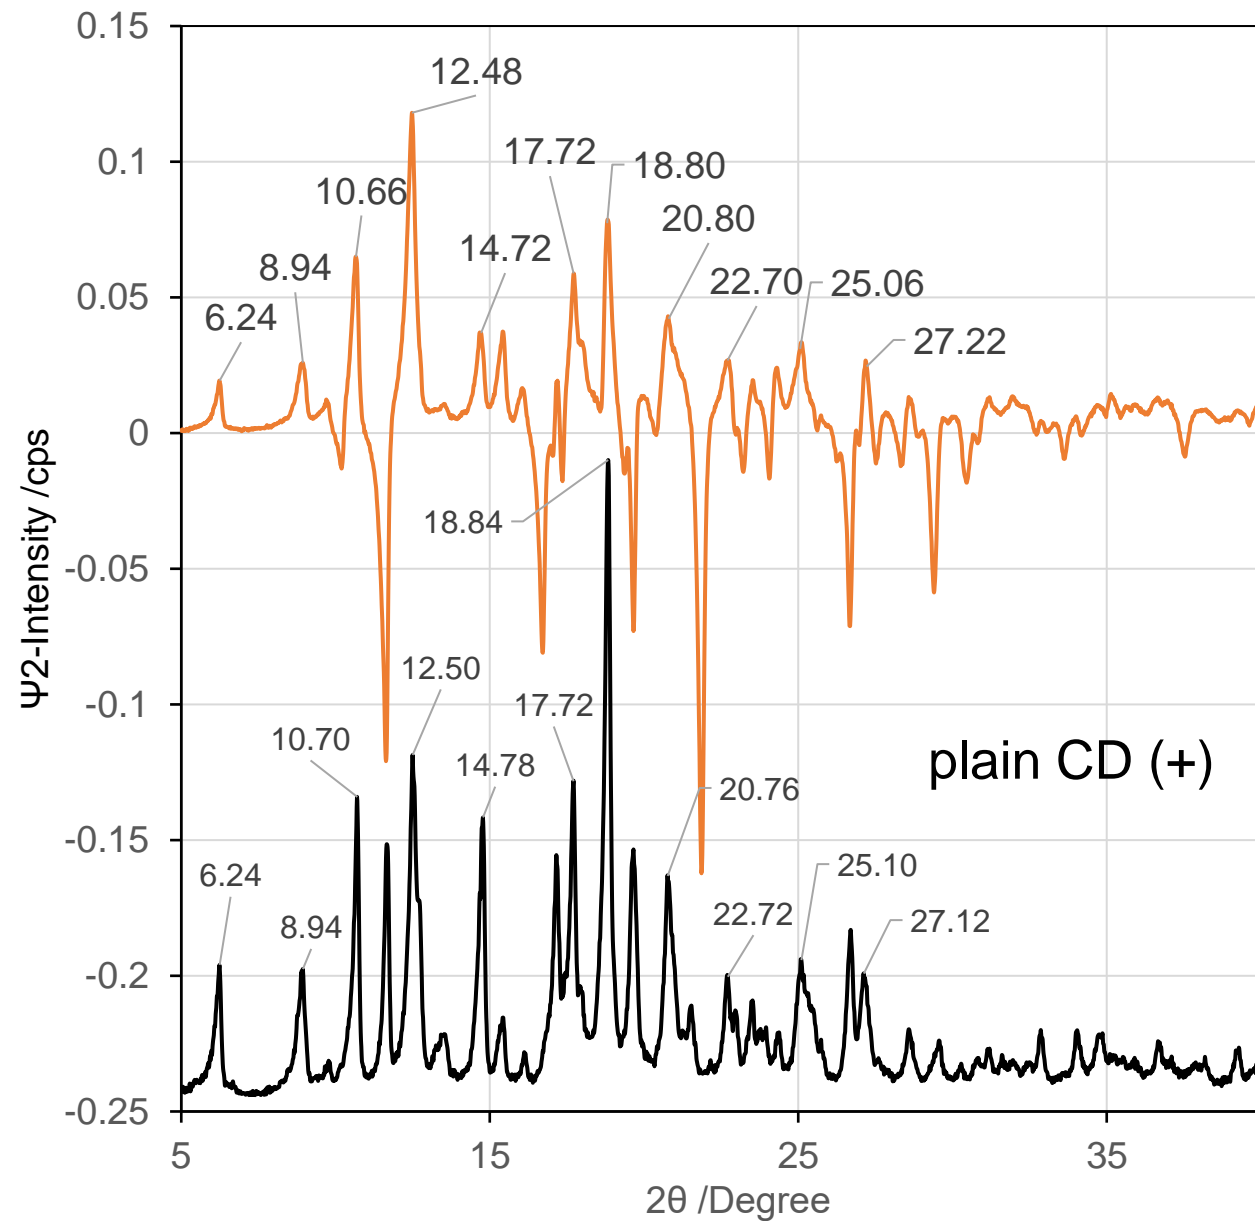

Figure S7(B) The 2-nd singular vector (orange) compared with the pattern of the plain β-CD (cage-form).

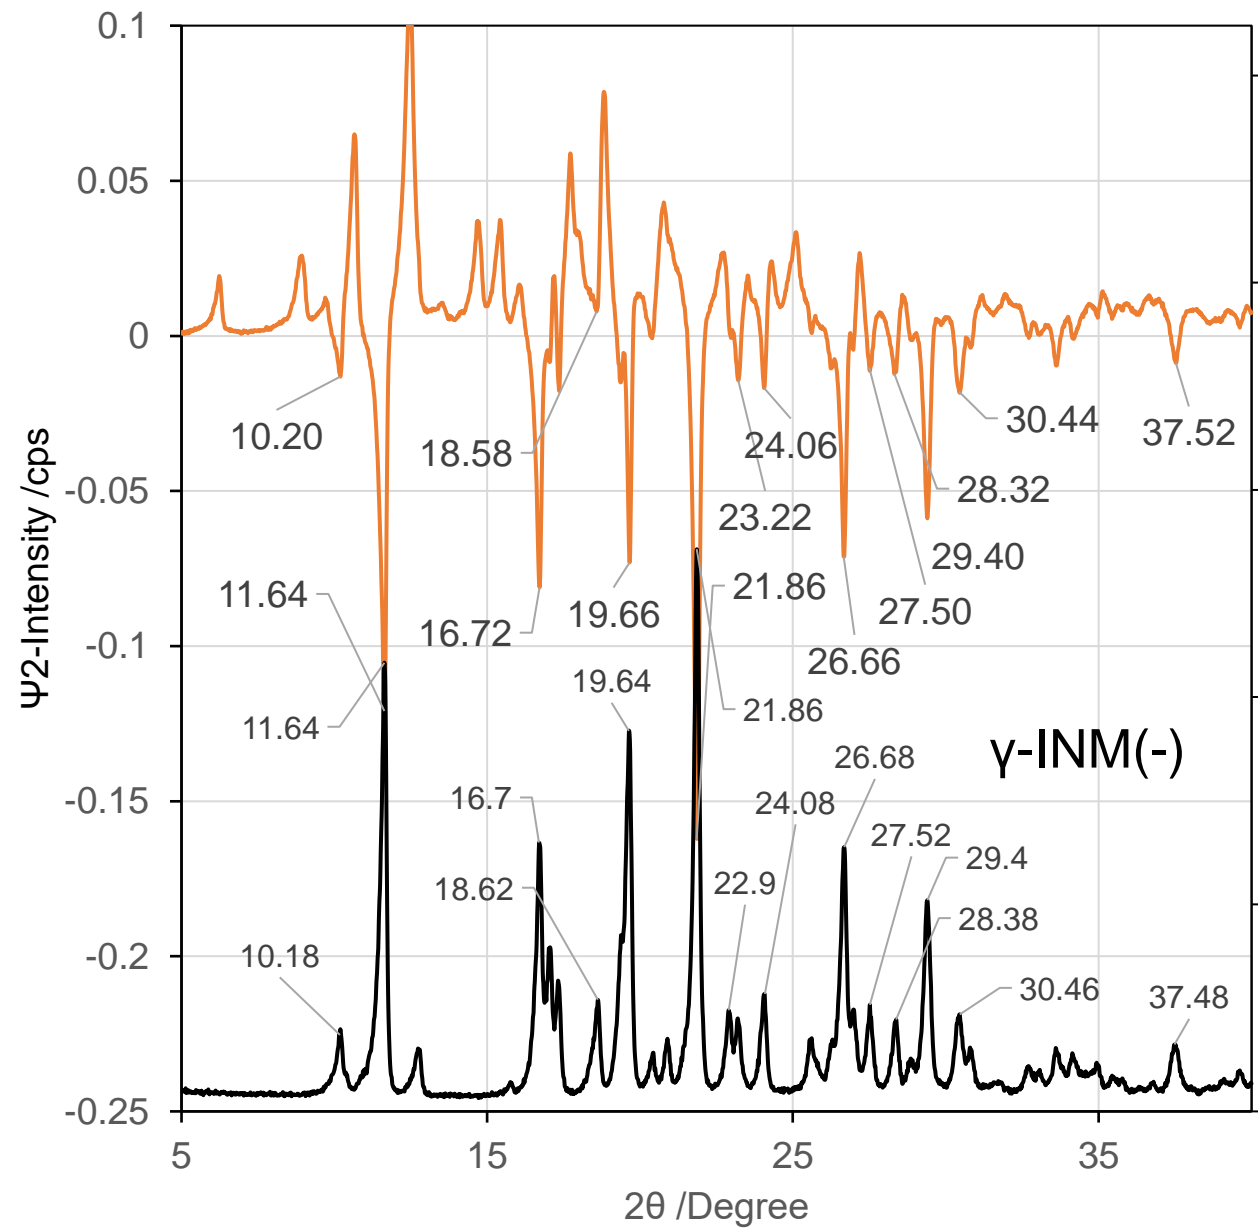

Figure S7(C) The 2-nd singular vector (orange) compared with the pattern of the neat INM ( $\gamma$ -form).



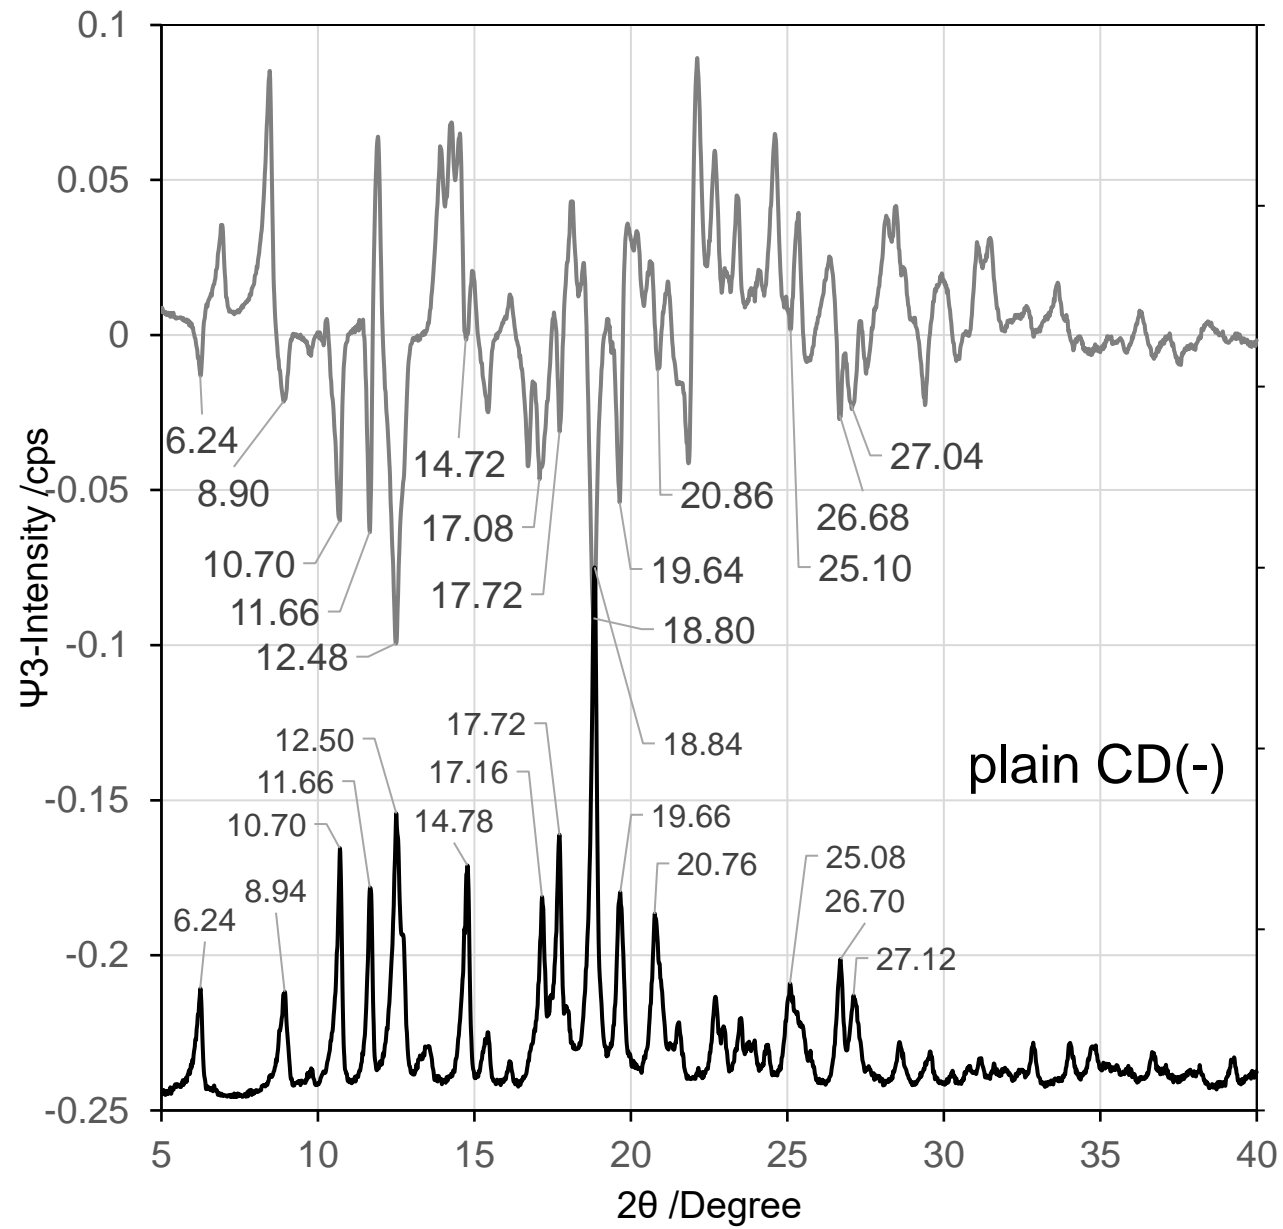

Figure S7(D) The 3-rd singular vector (gray) compared with the pattern of the plain  $\beta$ -CD (cage-form).

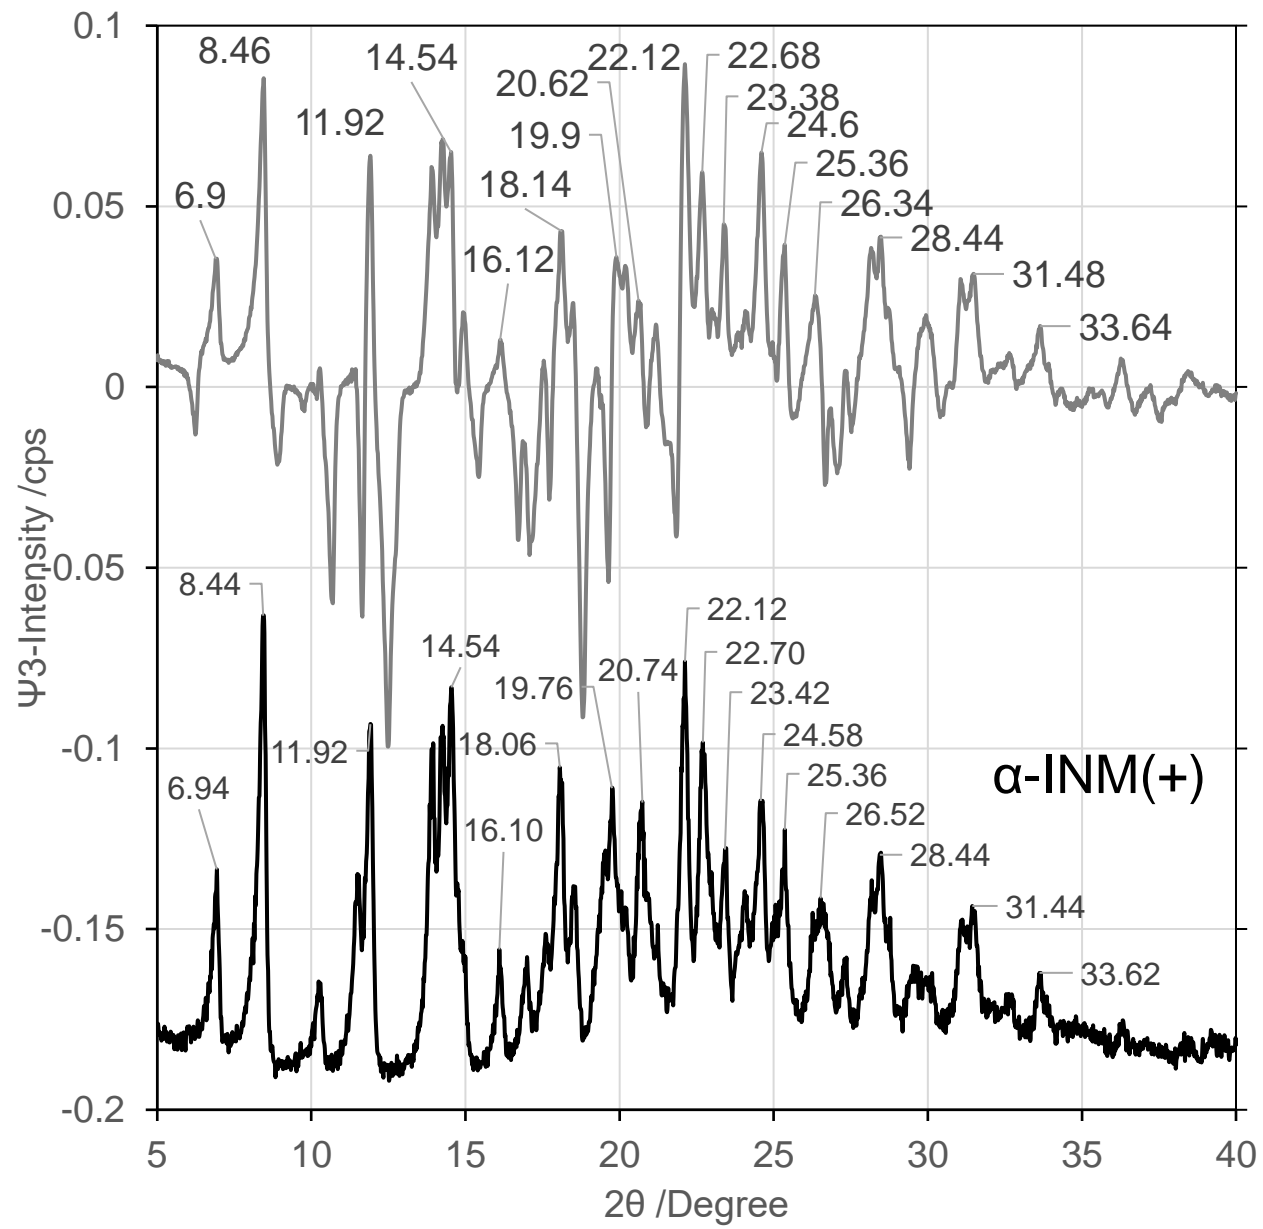

Figure S7(E) The 3-rd singular vector (gray) compared with the pattern of the recrystallized  $\alpha$ -INM.

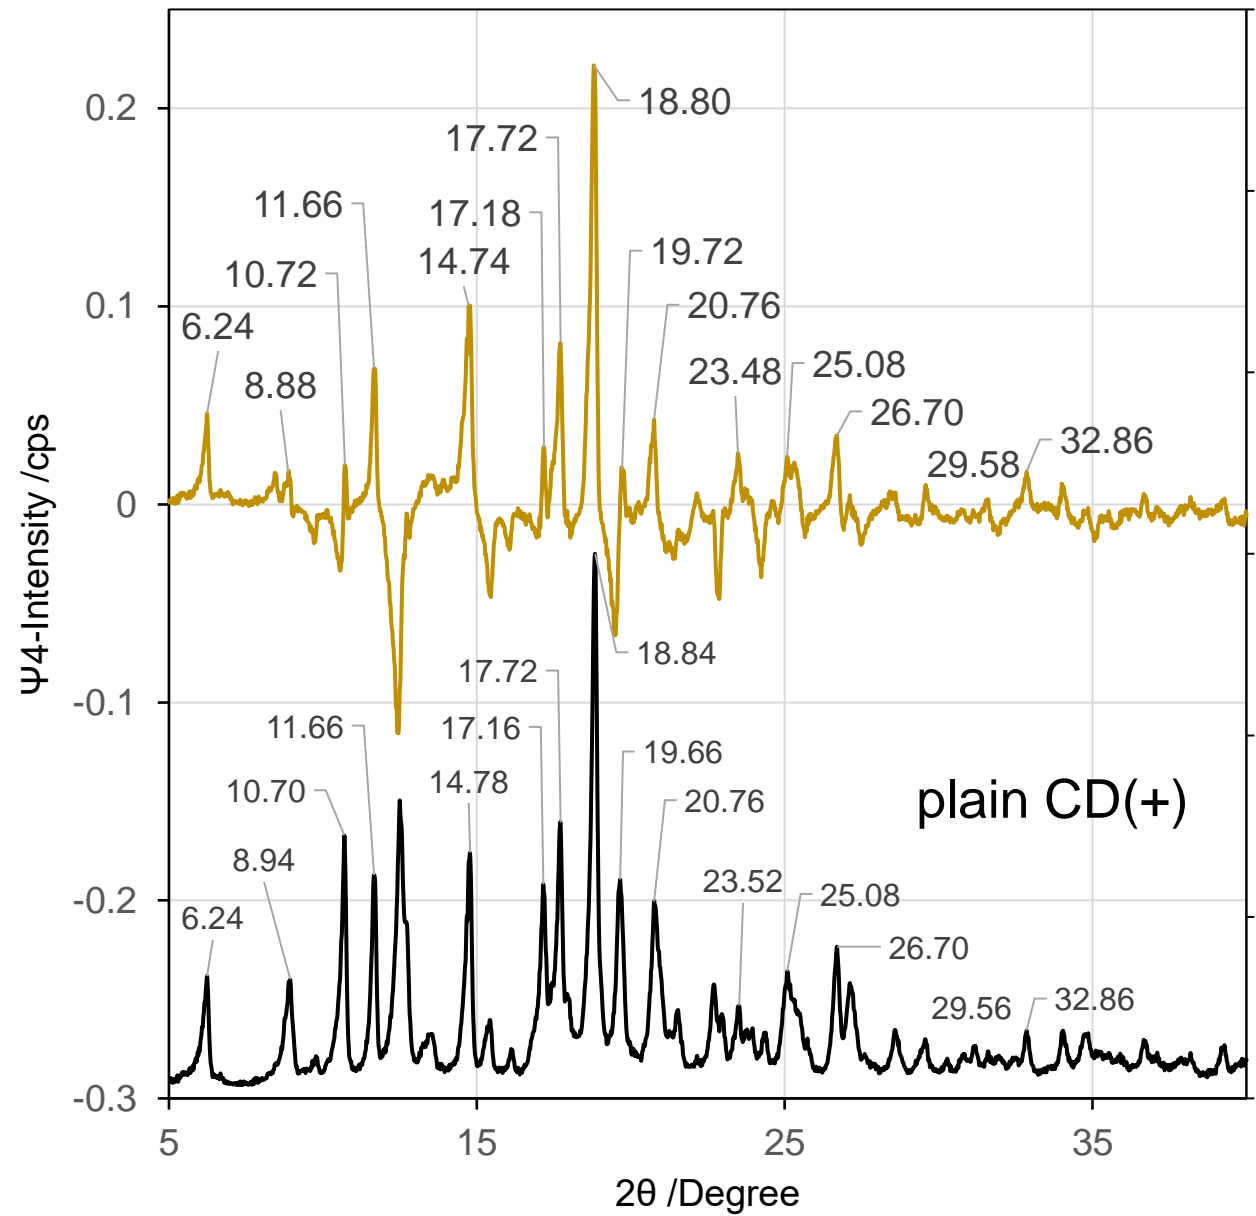

Figure S7(F) The 4-th singular vector (gray) compared with the pattern of the recrystallized  $\alpha$ -INM.

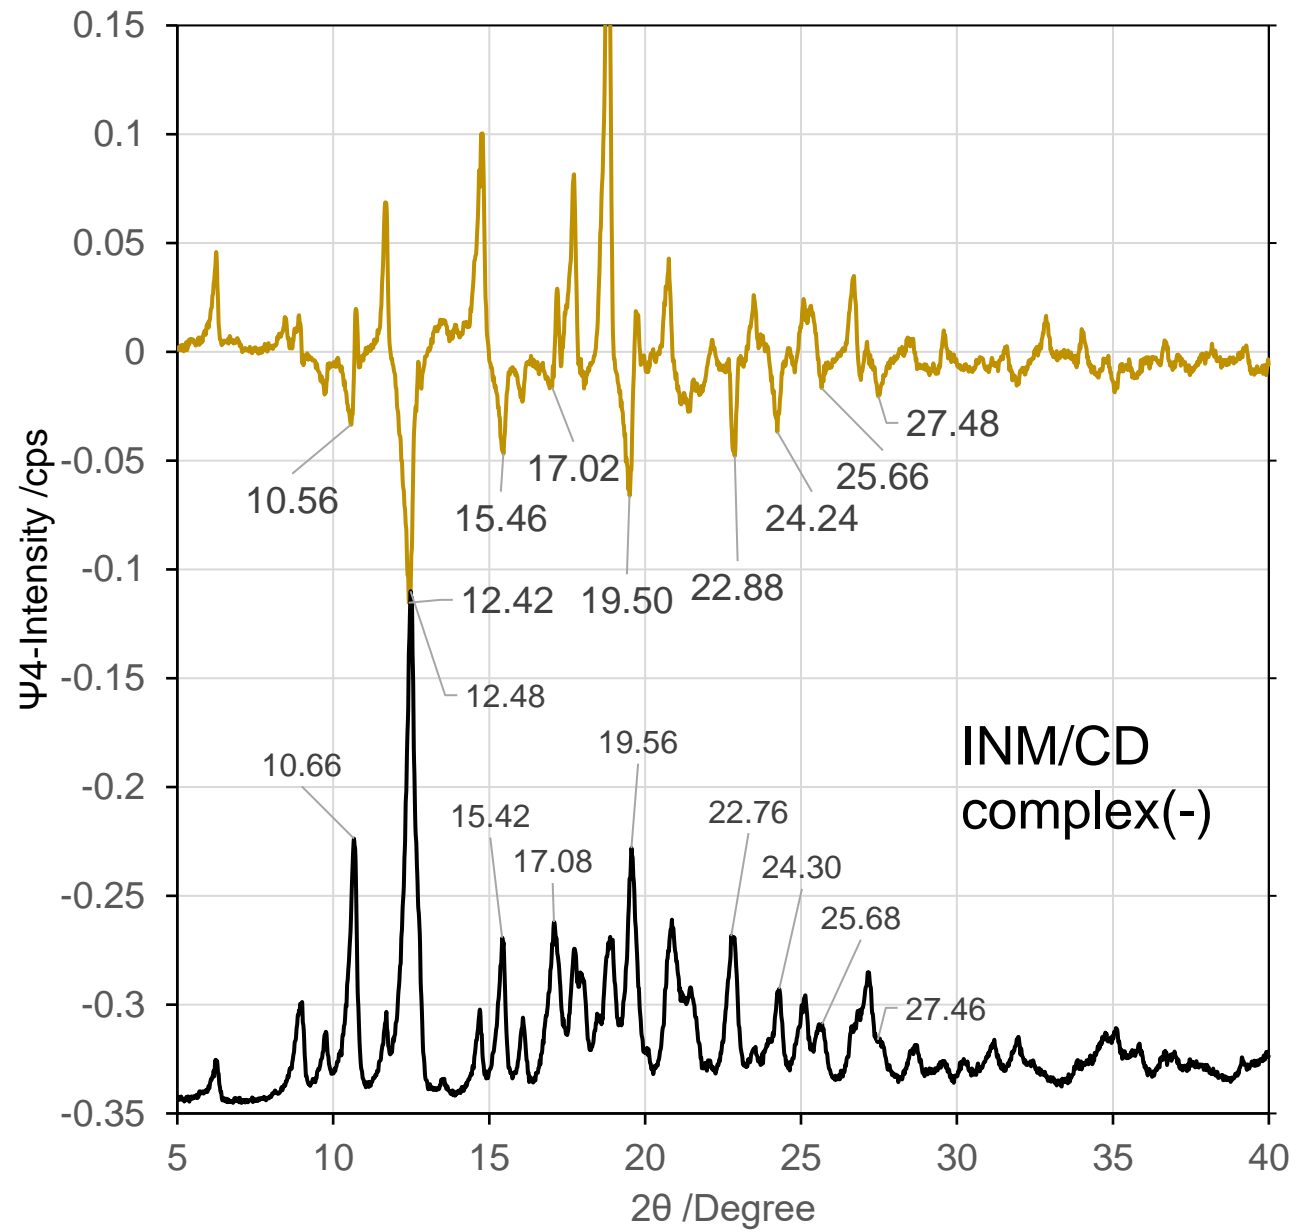

Figure S7(G) The 4-th singular vector (brown) compared with the pattern of the INM/CD complex/

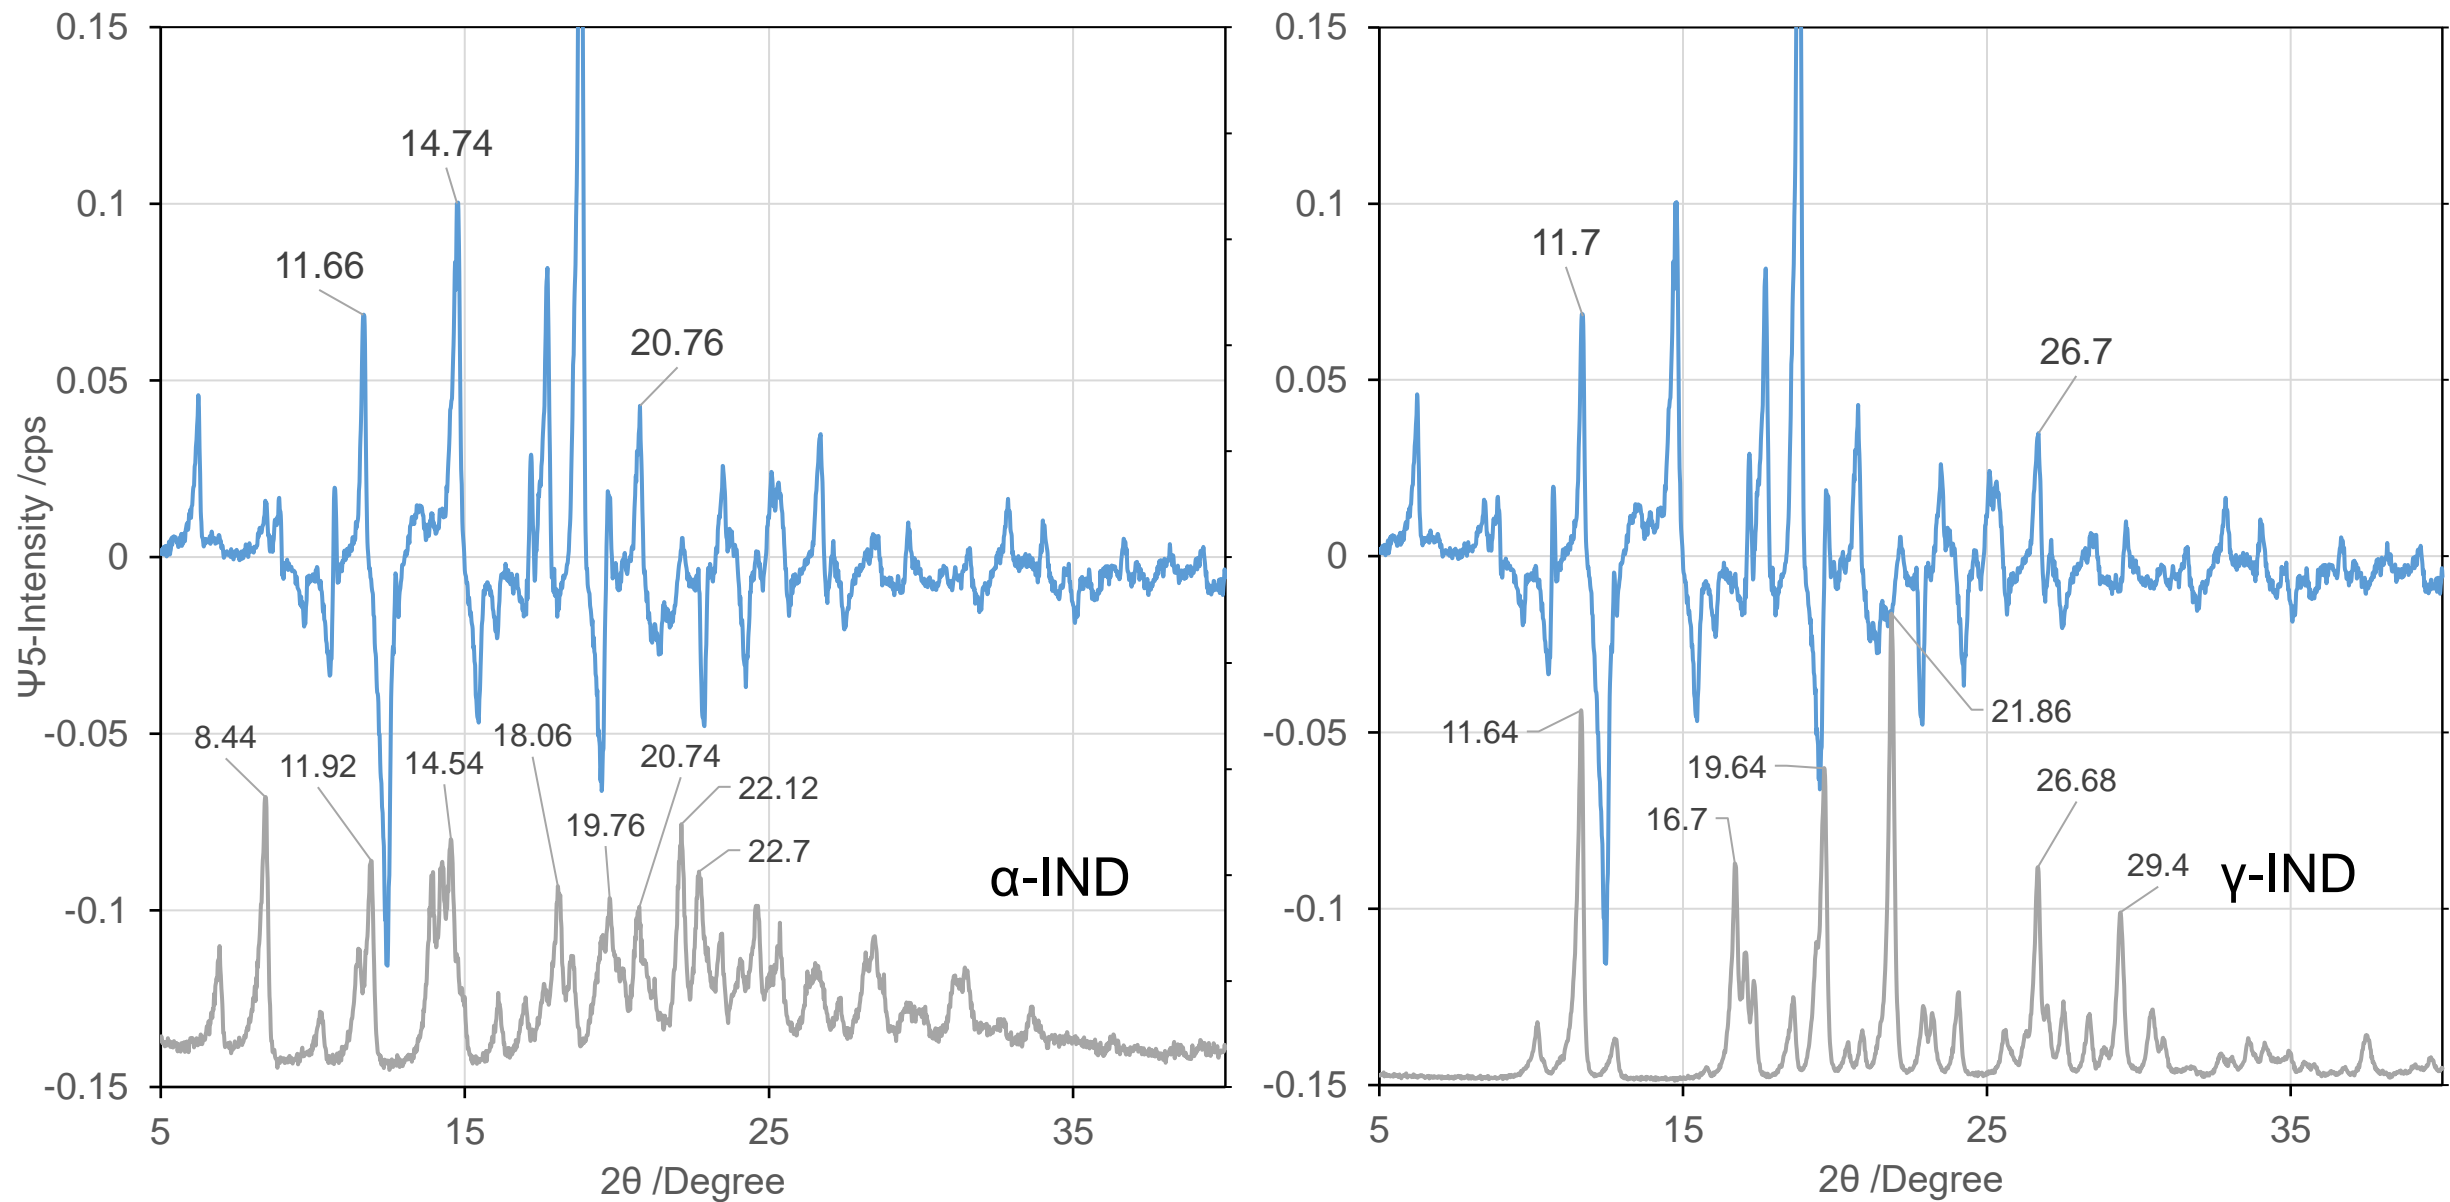

Figure S7(H) The 5-th singular vector (blue) compared with the patterns of the  $\alpha$ - and  $\gamma$ -IND crystals.

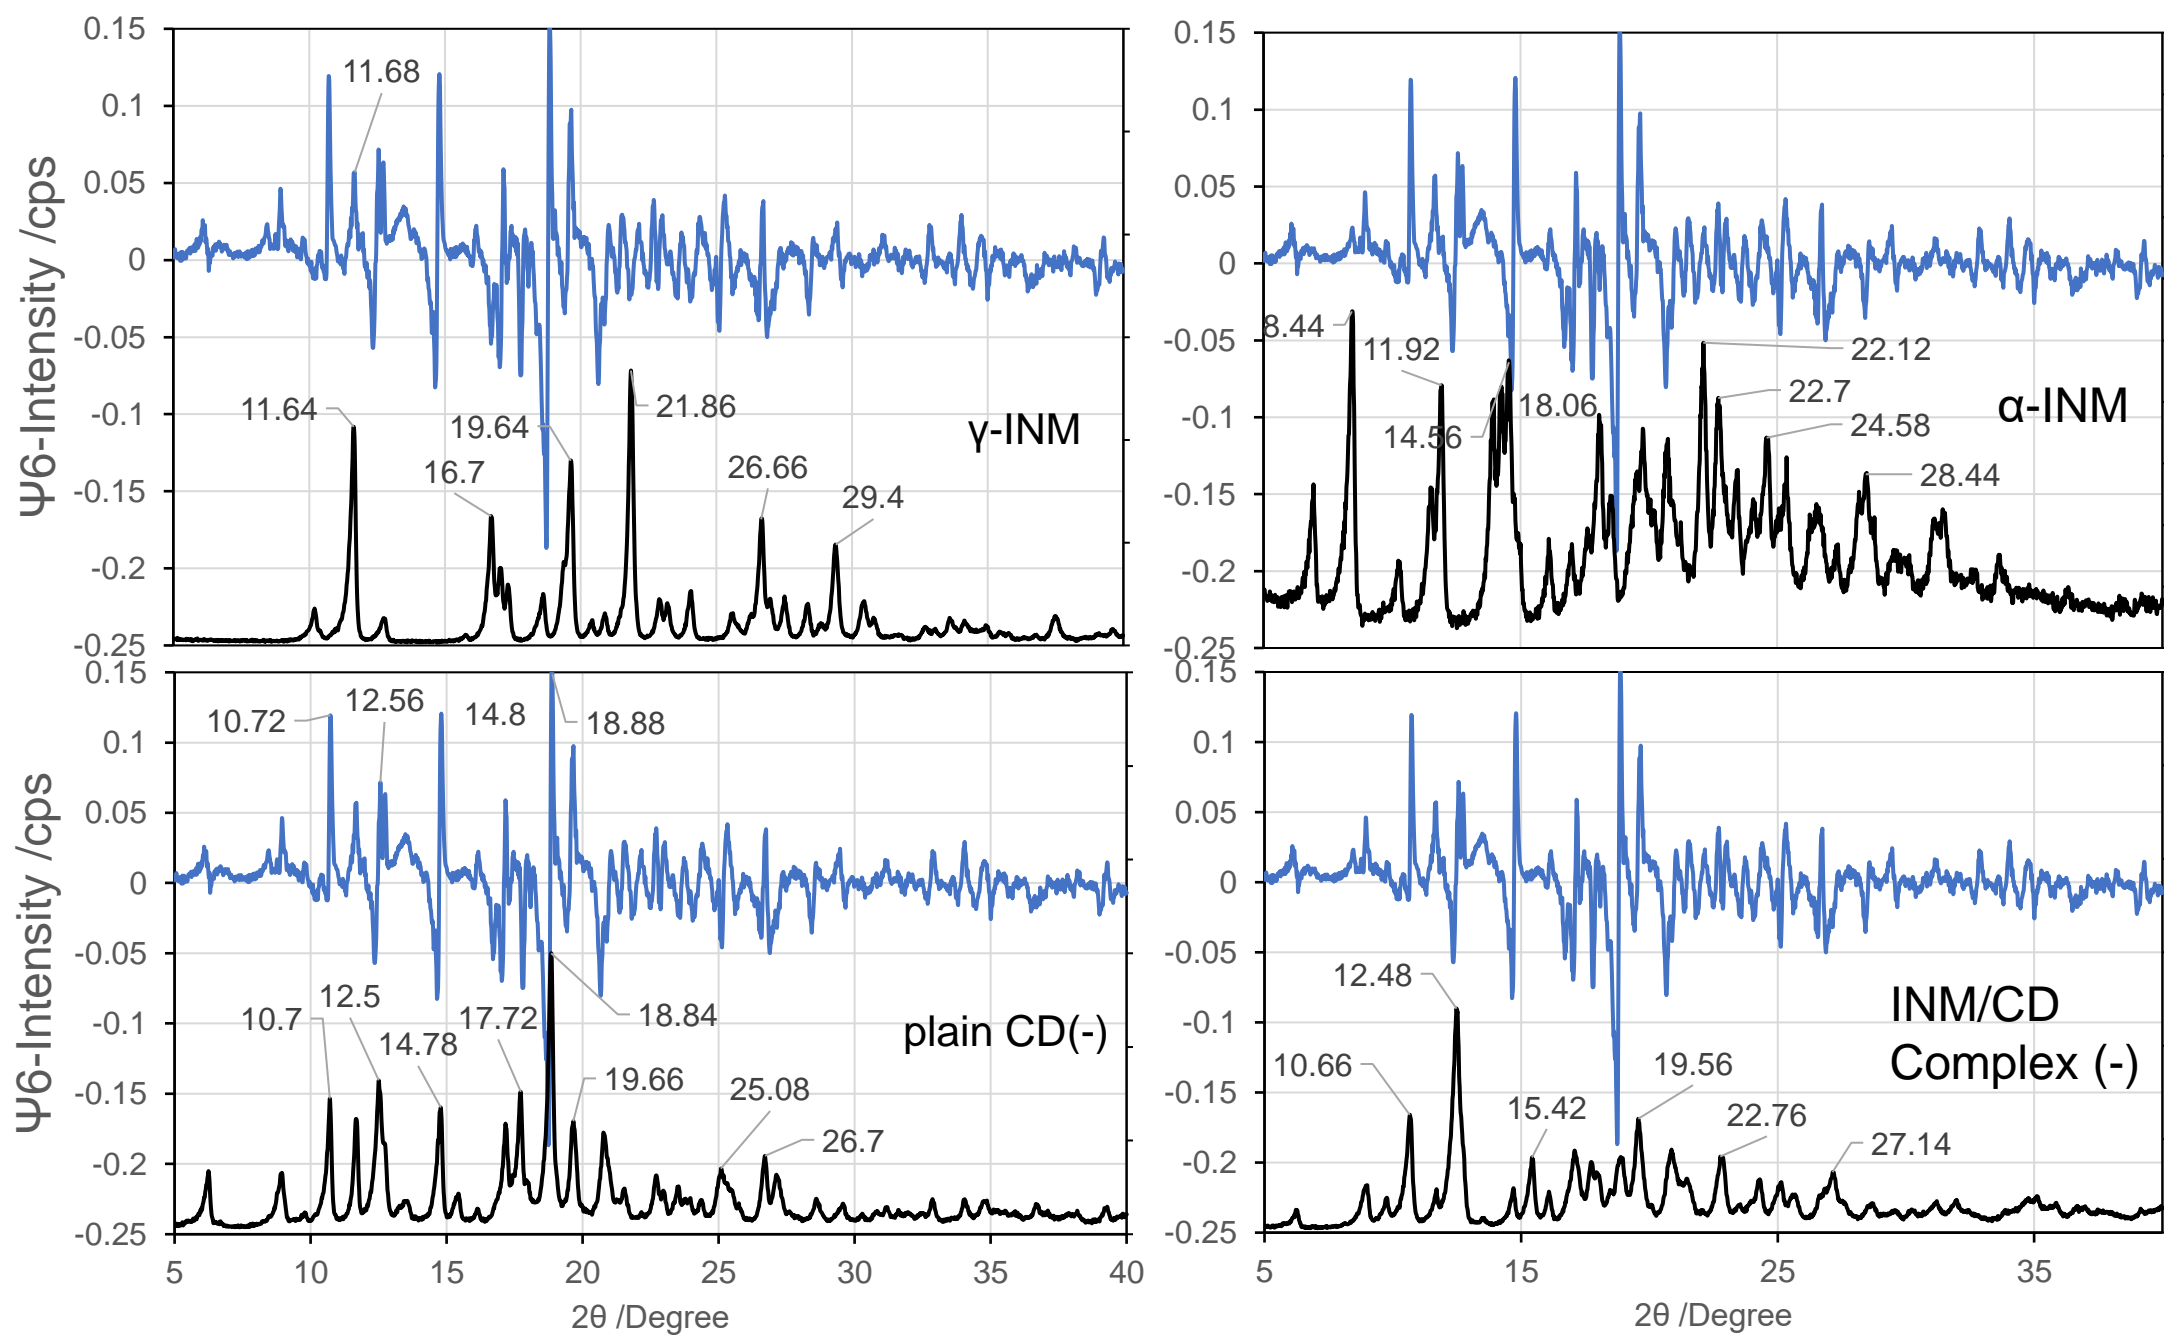

Figure S7(I) The 6-th singular vector (indigo) compared with the patterns of the INMs and CDs.

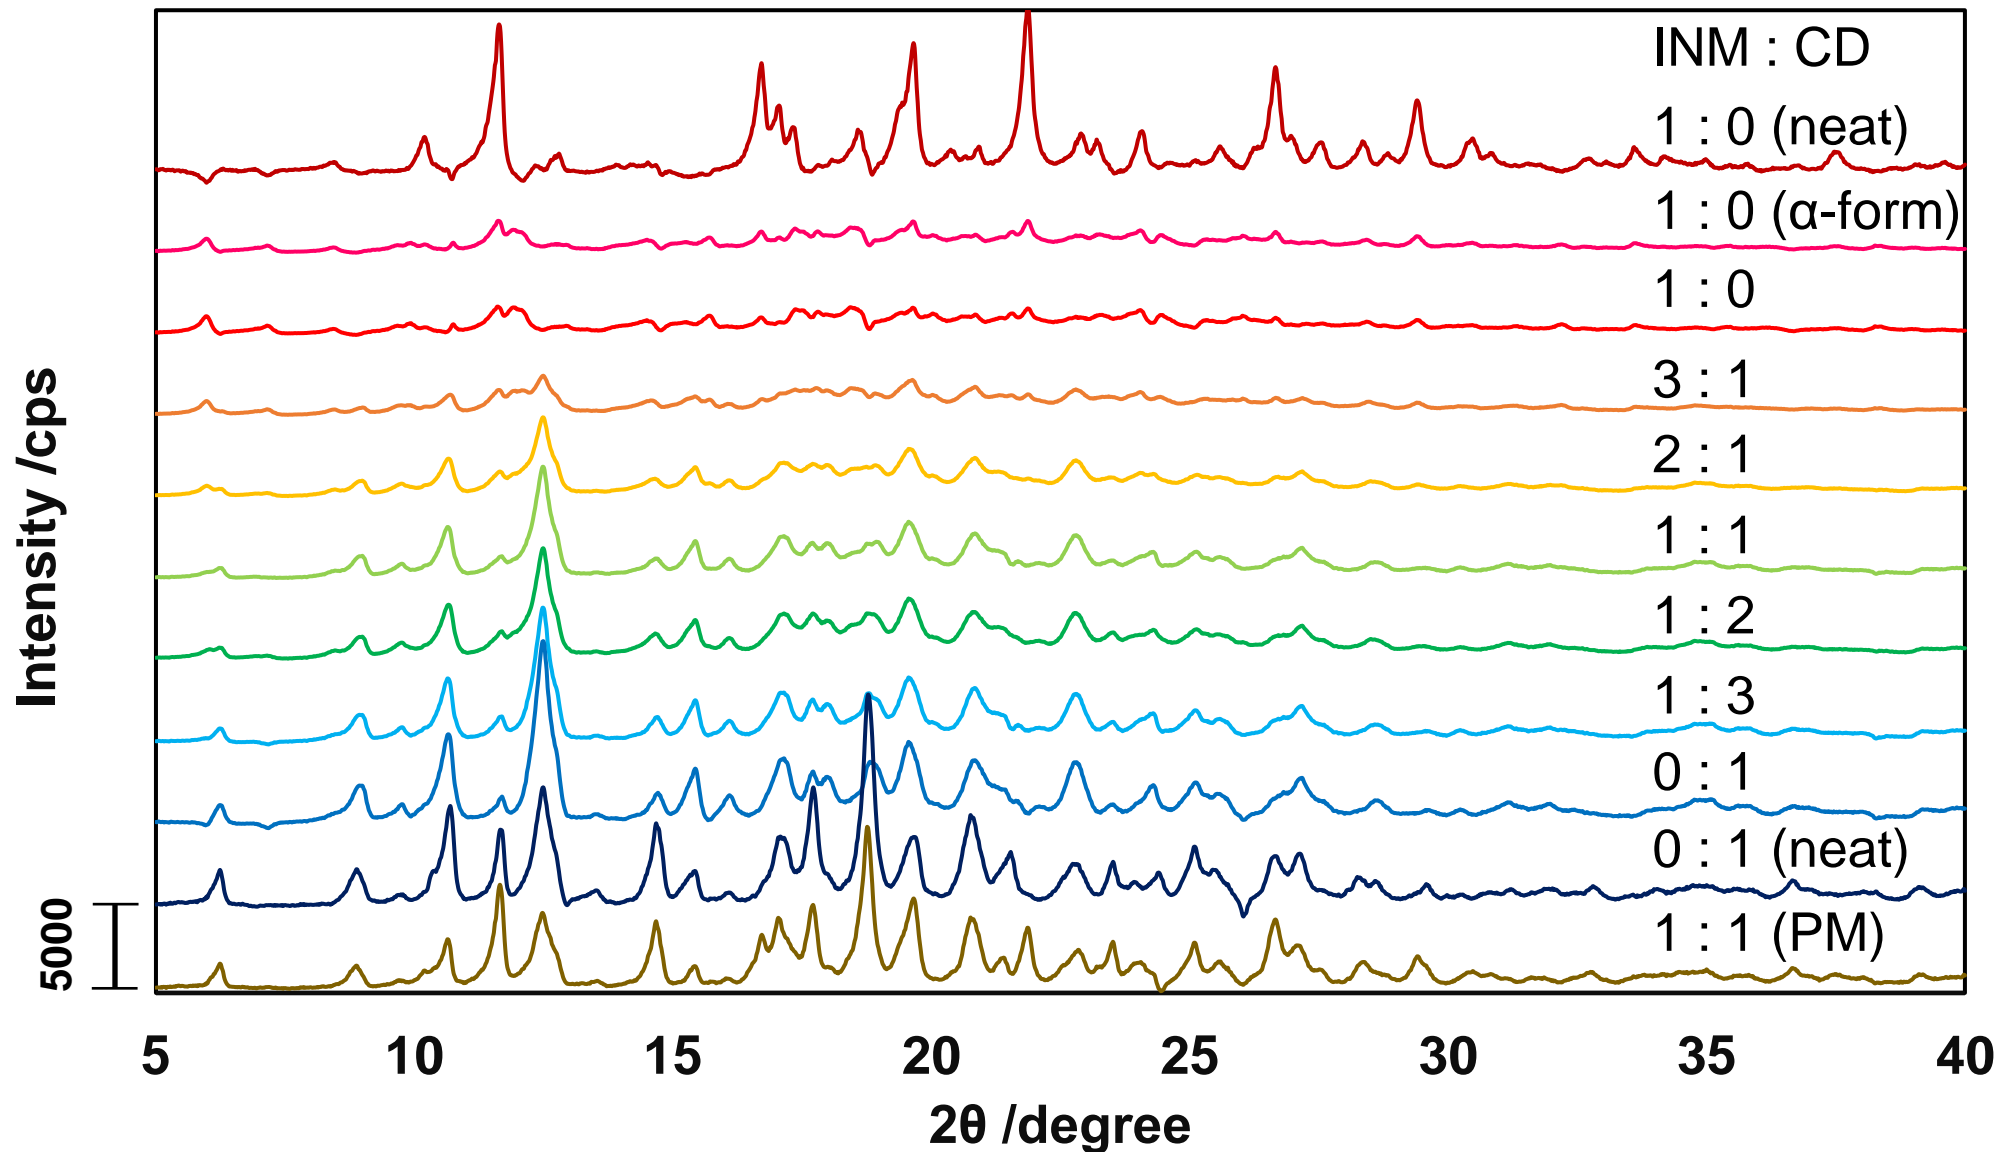

Figure S8 (A) Diffractograms of INM and their mixtures reproduced with 1st-7th components obtained by SVD on  $1751 \times 35$  matrix. Those of neat INM (burgundy),  $\alpha$ -INM (magenta), the SM-prepared INM/ $\beta$ -CD mixtures at various molar ratios, neat  $\beta$ -CD (indigo), and PM-treated INM/ $\beta$ -CD (brown).

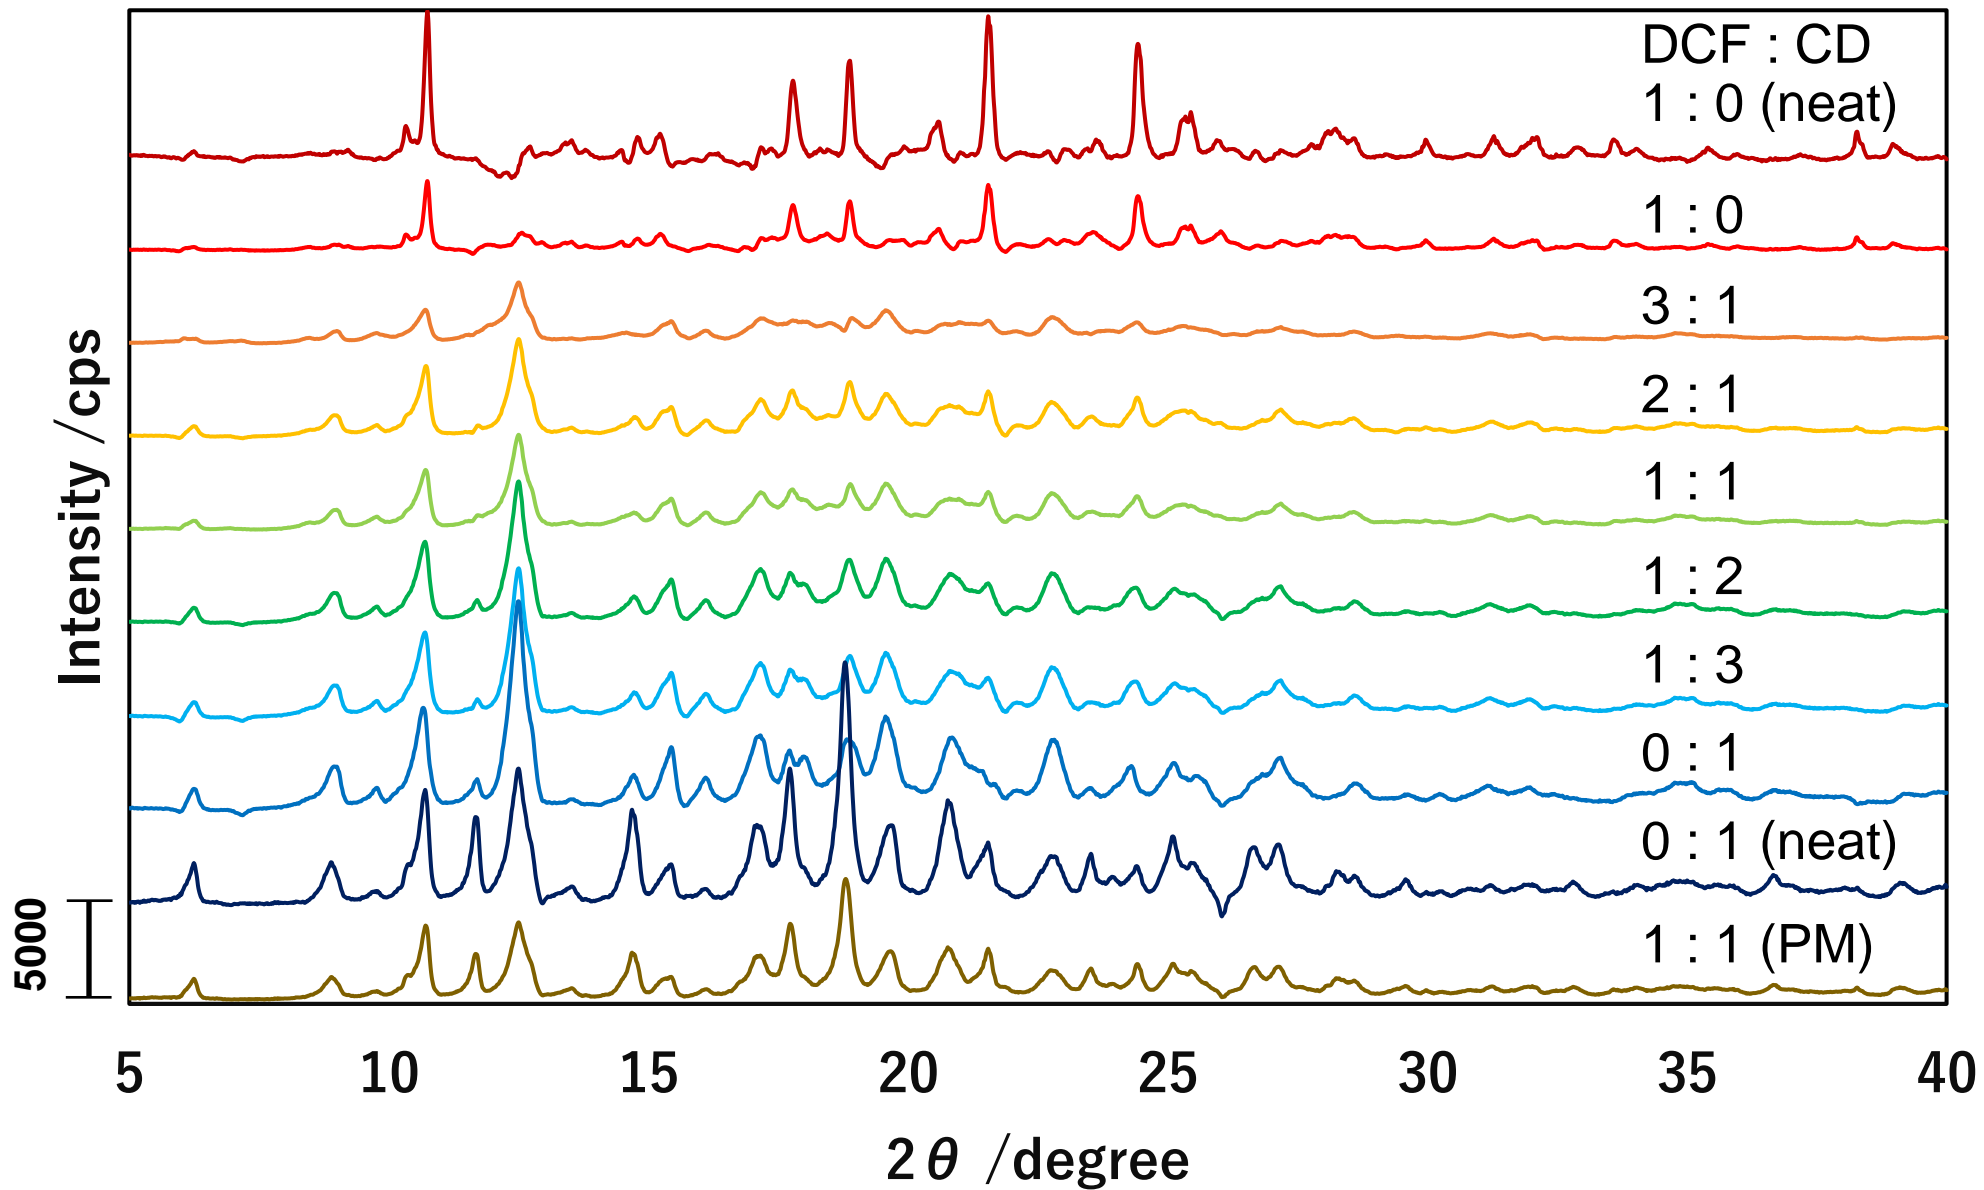

Figure S8 (B) Diffractograms of DCF and their mixtures reproduced with 1st-7th components obtained by SVD on  $1751 \times 35$  matrix. Those of neat DCF (burgundy), the SM-prepared DCF/ $\beta$ -CD mixtures at various molar ratios, neat  $\beta$ -CD (indigo), and PM-treated DCF/ $\beta$ -CD (brown).



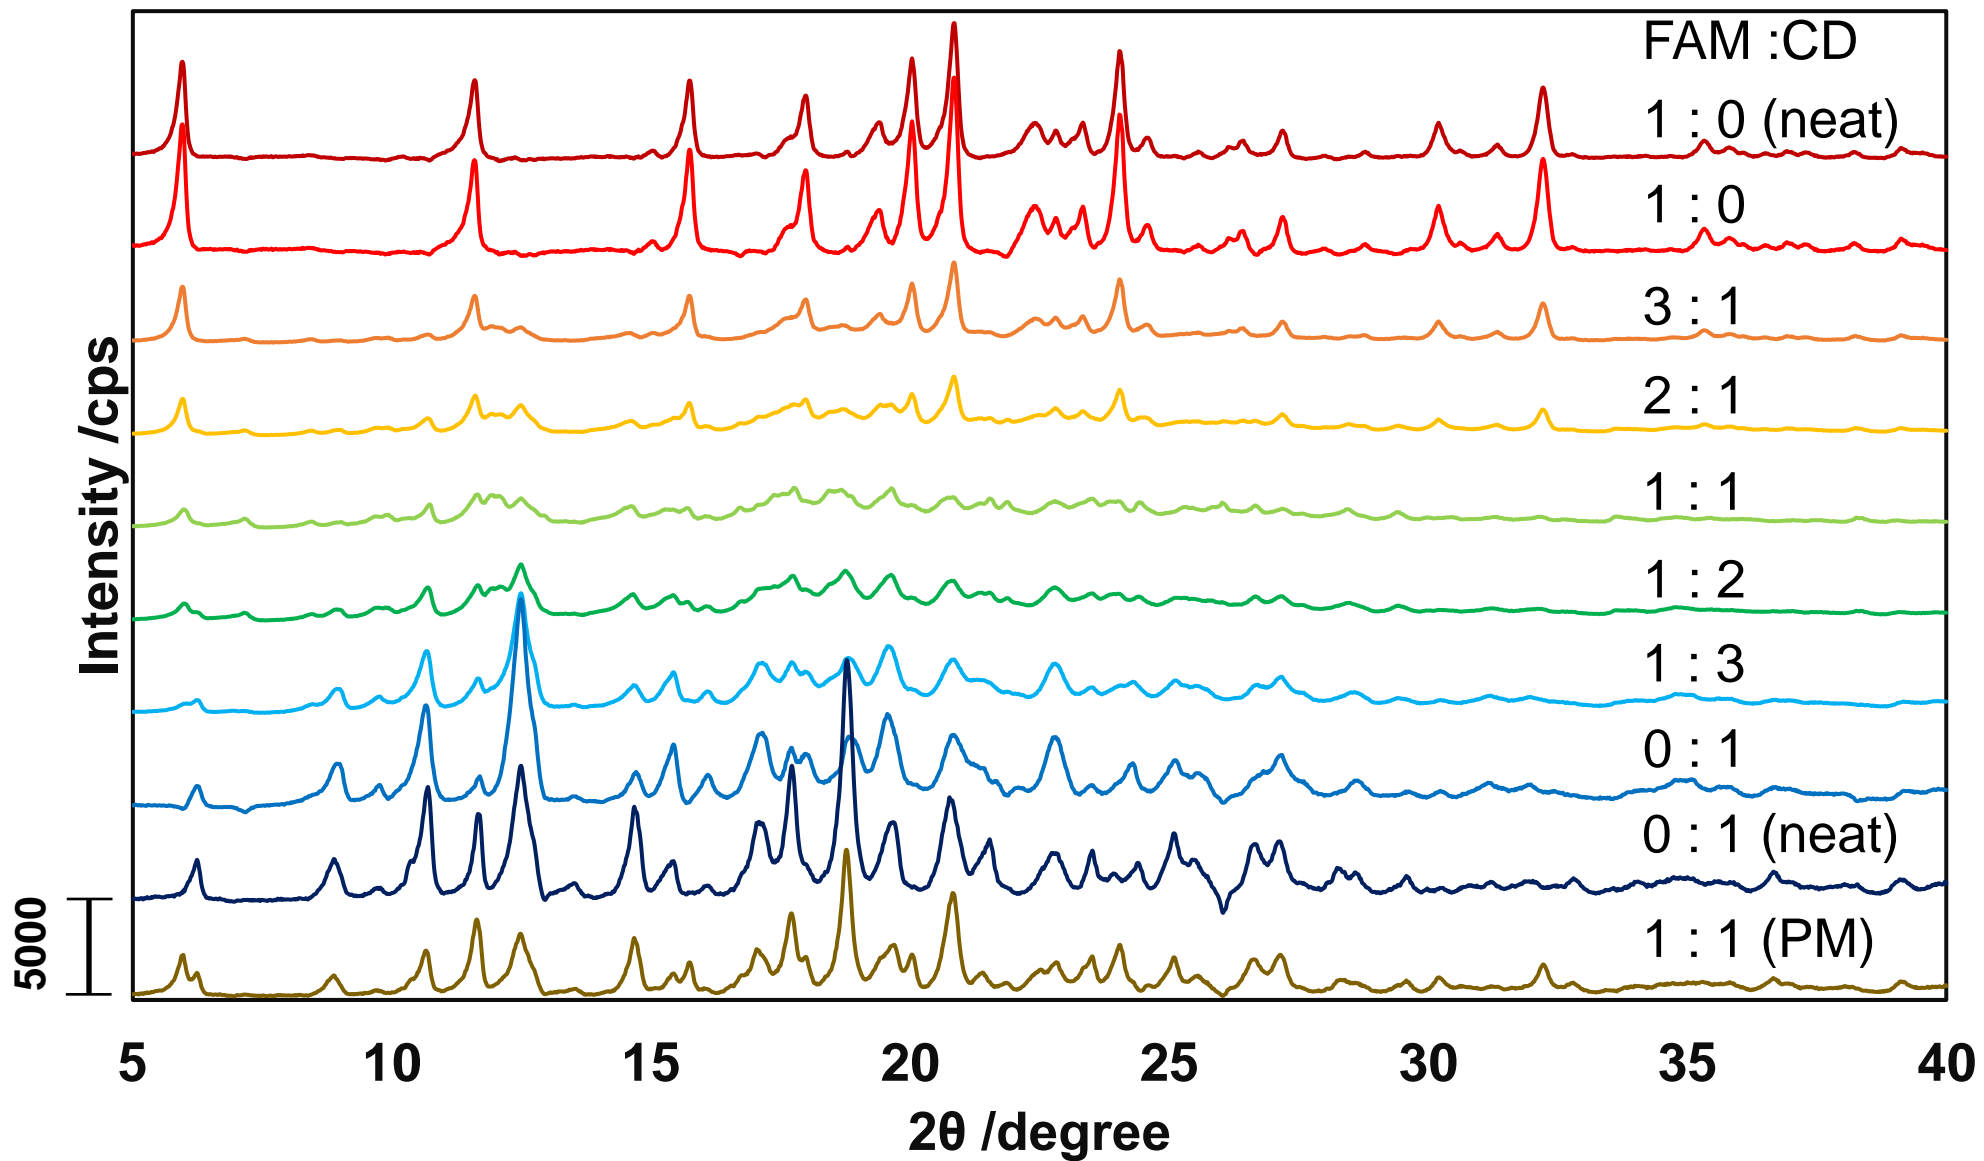

Figure S8 (C) Diffractograms of FAM and their mixtures reproduced with 1st-7th components obtained by SVD on  $1751 \times 35$  matrix. Those of neat FAM (burgundy), the SM-prepared FAM/ $\beta$ -CD mixtures at various molar ratios, neat  $\beta$ -CD (indigo), and PM-treated FAM/ $\beta$ -CD (brown).

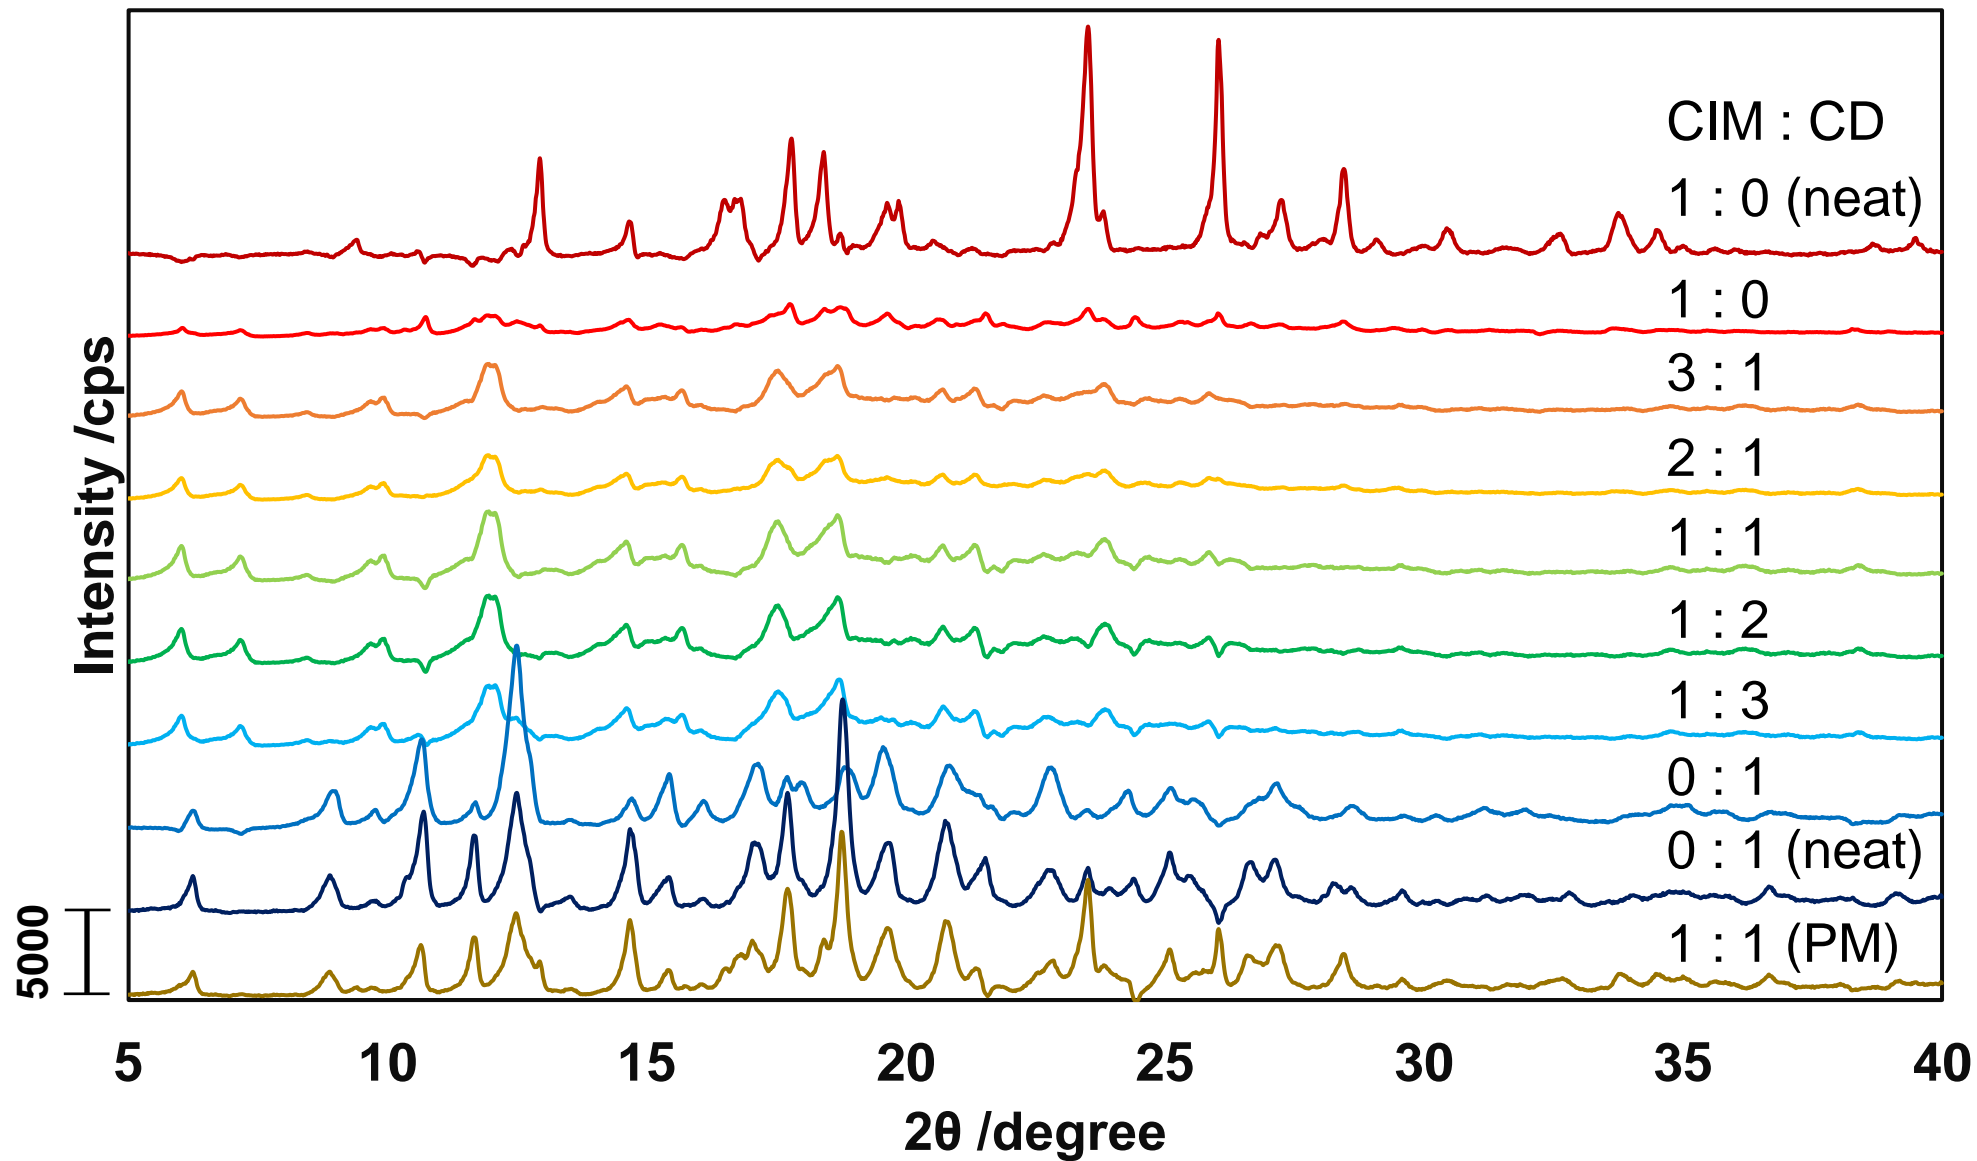

Figure S8 (D) Diffractograms of CIM and their mixtures reproduced with 1st-7th components obtained by SVD on  $1751 \times 35$  matrix. Those of neat CIM (burgundy), the SM-prepared CIM/ $\beta$ -CD mixtures at various molar ratios, neat  $\beta$ -CD (indigo), and PM-treated CIM/ $\beta$ -CD (brown).
